# Supplementary material for: The Potential for Healthy, Sustainable, and Equitable Transport Systems in Africa and the Caribbean: A Mixed-Methods Systematic Review and Meta-Study
Source: MDPI journal article supplement (doi:10.3390/su15065303), 2023-03-16
Supplement: s1 [file s1]

## SUPPORTING INFORMATION CAPTIONS

### File S1. Reporting guidelines.

#### PRISMA 2020 Checklist

| Section and Topic             | Item # | Checklist Item                                                                                                                                                                                                                                                                                       | Location Where Item is Reported |
|-------------------------------|--------|------------------------------------------------------------------------------------------------------------------------------------------------------------------------------------------------------------------------------------------------------------------------------------------------------|---------------------------------|
| <b>TITLE</b>                  |        |                                                                                                                                                                                                                                                                                                      |                                 |
| Title                         | 1      | Identify the report as a systematic review.                                                                                                                                                                                                                                                          |                                 |
| <b>ABSTRACT</b>               |        |                                                                                                                                                                                                                                                                                                      |                                 |
| Abstract                      | 2      | See the PRISMA 2020 for Abstracts checklist.                                                                                                                                                                                                                                                         |                                 |
| <b>INTRODUCTION</b>           |        |                                                                                                                                                                                                                                                                                                      |                                 |
| Rationale                     | 3      | Describe the rationale for the review in the context of existing knowledge.                                                                                                                                                                                                                          |                                 |
| Objectives                    | 4      | Provide an explicit statement of the objective(s) or question(s) the review addresses.                                                                                                                                                                                                               |                                 |
| <b>METHODS</b>                |        |                                                                                                                                                                                                                                                                                                      |                                 |
| Eligibility criteria          | 5      | Specify the inclusion and exclusion criteria for the review and how studies were grouped for the syntheses.                                                                                                                                                                                          |                                 |
| Information sources           | 6      | Specify all databases, registers, websites, organisations, reference lists and other sources searched or consulted to identify studies. Specify the date when each source was last searched or consulted.                                                                                            |                                 |
| Search strategy               | 7      | Present the full search strategies for all databases, registers and websites, including any filters and limits used.                                                                                                                                                                                 |                                 |
| Selection process             | 8      | Specify the methods used to decide whether a study met the inclusion criteria of the review, including how many reviewers screened each record and each report retrieved, whether they worked independently, and if applicable, details of automation tools used in the process.                     |                                 |
| Data collection process       | 9      | Specify the methods used to collect data from reports, including how many reviewers collected data from each report, whether they worked independently, any processes for obtaining or confirming data from study investigators, and if applicable, details of automation tools used in the process. |                                 |
| Data items                    | 10a    | List and define all outcomes for which data were sought. Specify whether all results that were compatible with each outcome domain in each study were sought (e.g. for all measures, time points, analyses), and if not, the methods used to decide which results to collect.                        |                                 |
|                               | 10b    | List and define all other variables for which data were sought (e.g. participant and intervention characteristics, funding sources). Describe any assumptions made about any missing or unclear information.                                                                                         |                                 |
| Study risk of bias assessment | 11     | Specify the methods used to assess risk of bias in the included studies, including details of the tool(s) used, how many reviewers assessed each study and whether they worked independently, and if applicable, details of automation tools used in the process.                                    |                                 |
| Effect measures               | 12     | Specify for each outcome the effect measure(s) (e.g. risk ratio, mean difference) used in the synthesis or presentation of results.                                                                                                                                                                  |                                 |

| Section and Topic             | Item # | Checklist Item                                                                                                                                                                                                                                                                       | Location Where Item is Reported |
|-------------------------------|--------|--------------------------------------------------------------------------------------------------------------------------------------------------------------------------------------------------------------------------------------------------------------------------------------|---------------------------------|
| Synthesis methods             | 13a    | Describe the processes used to decide which studies were eligible for each synthesis (e.g. tabulating the study intervention characteristics and comparing against the planned groups for each synthesis (item #5)).                                                                 |                                 |
|                               | 13b    | Describe any methods required to prepare the data for presentation or synthesis, such as handling of missing summary statistics, or data conversions.                                                                                                                                |                                 |
|                               | 13c    | Describe any methods used to tabulate or visually display results of individual studies and syntheses.                                                                                                                                                                               |                                 |
|                               | 13d    | Describe any methods used to synthesize results and provide a rationale for the choice(s). If meta-analysis was performed, describe the model(s), method(s) to identify the presence and extent of statistical heterogeneity, and software package(s) used.                          |                                 |
|                               | 13e    | Describe any methods used to explore possible causes of heterogeneity among study results (e.g. subgroup analysis, meta-regression).                                                                                                                                                 |                                 |
|                               | 13f    | Describe any sensitivity analyses conducted to assess robustness of the synthesized results.                                                                                                                                                                                         |                                 |
| Reporting bias assessment     | 14     | Describe any methods used to assess risk of bias due to missing results in a synthesis (arising from reporting biases).                                                                                                                                                              |                                 |
| Certainty assessment          | 15     | Describe any methods used to assess certainty (or confidence) in the body of evidence for an outcome.                                                                                                                                                                                |                                 |
| <b>RESULTS</b>                |        |                                                                                                                                                                                                                                                                                      |                                 |
| Study selection               | 16a    | Describe the results of the search and selection process, from the number of records identified in the search to the number of studies included in the review, ideally using a flow diagram.                                                                                         |                                 |
|                               | 16b    | Cite studies that might appear to meet the inclusion criteria, but which were excluded, and explain why they were excluded.                                                                                                                                                          |                                 |
| Study characteristics         | 17     | Cite each included study and present its characteristics.                                                                                                                                                                                                                            |                                 |
| Risk of bias in studies       | 18     | Present assessments of risk of bias for each included study.                                                                                                                                                                                                                         |                                 |
| Results of individual studies | 19     | For all outcomes, present, for each study: (a) summary statistics for each group (where appropriate) and (b) an effect estimate and its precision (e.g. confidence/credible interval), ideally using structured tables or plots.                                                     |                                 |
| Results of syntheses          | 20a    | For each synthesis, briefly summarise the characteristics and risk of bias among contributing studies.                                                                                                                                                                               |                                 |
|                               | 20b    | Present results of all statistical syntheses conducted. If meta-analysis was done, present for each the summary estimate and its precision (e.g. confidence/credible interval) and measures of statistical heterogeneity. If comparing groups, describe the direction of the effect. |                                 |
|                               | 20c    | Present results of all investigations of possible causes of heterogeneity among study results.                                                                                                                                                                                       |                                 |
|                               | 20d    | Present results of all sensitivity analyses conducted to assess the robustness of the synthesized results.                                                                                                                                                                           |                                 |
| Reporting biases              | 21     | Present assessments of risk of bias due to missing results (arising from reporting biases) for each synthesis assessed.                                                                                                                                                              |                                 |
| Certainty of                  | 22     | Present assessments of certainty (or confidence) in the body of evidence for each outcome assessed.                                                                                                                                                                                  |                                 |

| Section and Topic                              | Item # | Checklist Item                                                                                                                                                                                                                             | Location Where Item is Reported |
|------------------------------------------------|--------|--------------------------------------------------------------------------------------------------------------------------------------------------------------------------------------------------------------------------------------------|---------------------------------|
| evidence                                       |        |                                                                                                                                                                                                                                            |                                 |
| <b>DISCUSSION</b>                              |        |                                                                                                                                                                                                                                            |                                 |
| Discussion                                     | 23a    | Provide a general interpretation of the results in the context of other evidence.                                                                                                                                                          |                                 |
|                                                | 23b    | Discuss any limitations of the evidence included in the review.                                                                                                                                                                            |                                 |
|                                                | 23c    | Discuss any limitations of the review processes used.                                                                                                                                                                                      |                                 |
|                                                | 23d    | Discuss implications of the results for practice, policy, and future research.                                                                                                                                                             |                                 |
| <b>OTHER INFORMATION</b>                       |        |                                                                                                                                                                                                                                            |                                 |
| Registration and protocol                      | 24a    | Provide registration information for the review, including register name and registration number, or state that the review was not registered.                                                                                             |                                 |
|                                                | 24b    | Indicate where the review protocol can be accessed, or state that a protocol was not prepared.                                                                                                                                             |                                 |
|                                                | 24c    | Describe and explain any amendments to information provided at registration or in the protocol.                                                                                                                                            |                                 |
| Support                                        | 25     | Describe sources of financial or non-financial support for the review, and the role of the funders or sponsors in the review.                                                                                                              |                                 |
| Competing interests                            | 26     | Declare any competing interests of review authors.                                                                                                                                                                                         |                                 |
| Availability of data, code and other materials | 27     | Report which of the following are publicly available and where they can be found: template data collection forms; data extracted from included studies; data used for all analyses; analytic code; any other materials used in the review. |                                 |

## PRISMA 2020 for Abstracts Checklist

| Section and Topic    | Item # | Checklist item                                                                                                                 | Reported (Yes/No) |
|----------------------|--------|--------------------------------------------------------------------------------------------------------------------------------|-------------------|
| <b>TITLE</b>         |        |                                                                                                                                |                   |
| Title                | 1      | Identify the report as a systematic review.                                                                                    | Yes               |
| <b>BACKGROUND</b>    |        |                                                                                                                                |                   |
| Objectives           | 2      | Provide an explicit statement of the main objective(s) or question(s) the review addresses.                                    | Yes               |
| <b>METHODS</b>       |        |                                                                                                                                |                   |
| Eligibility criteria | 3      | Specify the inclusion and exclusion criteria for the review.                                                                   | Yes               |
| Information sources  | 4      | Specify the information sources (e.g. databases, registers) used to identify studies and the date when each was last searched. | Yes               |
| Risk of bias         | 5      | Specify the methods used to assess risk of bias in the included studies.                                                       | Yes               |
| Synthesis of results | 6      | Specify the methods used to present and synthesise results.                                                                    | Yes               |

| Section and Topic       | Item # | Checklist item                                                                                                                                                                                                                                                                                        | Reported (Yes/No) |
|-------------------------|--------|-------------------------------------------------------------------------------------------------------------------------------------------------------------------------------------------------------------------------------------------------------------------------------------------------------|-------------------|
| <b>RESULTS</b>          |        |                                                                                                                                                                                                                                                                                                       |                   |
| Included studies        | 7      | Give the total number of included studies and participants and summarise relevant characteristics of studies.                                                                                                                                                                                         | Yes               |
| Synthesis of results    | 8      | Present results for main outcomes, preferably indicating the number of included studies and participants for each. If meta-analysis was done, report the summary estimate and confidence/credible interval. If comparing groups, indicate the direction of the effect (i.e. which group is favoured). | Yes               |
| <b>DISCUSSION</b>       |        |                                                                                                                                                                                                                                                                                                       |                   |
| Limitations of evidence | 9      | Provide a brief summary of the limitations of the evidence included in the review (e.g. study risk of bias, inconsistency and imprecision).                                                                                                                                                           | Yes               |
| Interpretation          | 10     | Provide a general interpretation of the results and important implications.                                                                                                                                                                                                                           | Yes               |
| <b>OTHER</b>            |        |                                                                                                                                                                                                                                                                                                       |                   |
| Funding                 | 11     | Specify the primary source of funding for the review.                                                                                                                                                                                                                                                 | Yes               |
| Registration            | 12     | Provide the register name and registration number.                                                                                                                                                                                                                                                    | Yes               |

### Synthesis Without Meta-Analysis (SWiM) Reporting Items

| SWiM is intended to complement and be used as an extension to PRISMA |                                                                                                                                                                                                                                                                  |                                           |        |
|----------------------------------------------------------------------|------------------------------------------------------------------------------------------------------------------------------------------------------------------------------------------------------------------------------------------------------------------|-------------------------------------------|--------|
| SWiM reporting item                                                  | Item description                                                                                                                                                                                                                                                 | Page in manuscript where item is reported | Other* |
| <i>Methods</i>                                                       |                                                                                                                                                                                                                                                                  |                                           |        |
| 1 Grouping studies for synthesis                                     | 1a) Provide a description of, and rationale for, the groups used in the synthesis (e.g., groupings of populations, interventions, outcomes, study design)                                                                                                        |                                           |        |
|                                                                      | 1b) Detail and provide rationale for any changes made subsequent to the protocol in the groups used in the synthesis                                                                                                                                             |                                           |        |
| 2 Describe the standardised metric and transformation methods used   | Describe the standardised metric for each outcome. Explain why the metric(s) was chosen, and describe any methods used to transform the intervention effects, as reported in the study, to the standardised metric, citing any methodological guidance consulted |                                           |        |

|                                                                        |                                                                                                                                                                                                                                                                                                              |                                                  |               |
|------------------------------------------------------------------------|--------------------------------------------------------------------------------------------------------------------------------------------------------------------------------------------------------------------------------------------------------------------------------------------------------------|--------------------------------------------------|---------------|
| <b>3</b> Describe the synthesis methods                                | Describe and justify the methods used to synthesise the effects for each outcome when it was not possible to undertake a meta-analysis of effect estimates                                                                                                                                                   |                                                  |               |
| <b>4</b> Criteria used to prioritise results for summary and synthesis | Where applicable, provide the criteria used, with supporting justification, to select the particular studies, or a particular study, for the main synthesis or to draw conclusions from the synthesis (e.g., based on study design, risk of bias assessments, directness in relation to the review question) |                                                  |               |
| <b>SWiM reporting item</b>                                             | <b>Item description</b>                                                                                                                                                                                                                                                                                      | <b>Page in manuscript where item is reported</b> | <b>Other*</b> |
| <b>5</b> Investigation of heterogeneity in reported effects            | State the method(s) used to examine heterogeneity in reported effects when it was not possible to undertake a meta-analysis of effect estimates and its extensions to investigate heterogeneity                                                                                                              |                                                  |               |
| <b>6</b> Certainty of evidence                                         | Describe the methods used to assess certainty of the synthesis findings                                                                                                                                                                                                                                      |                                                  |               |
| <b>7</b> Data presentation methods                                     | Describe the graphical and tabular methods used to present the effects (e.g., tables, forest plots, harvest plots).<br>Specify key study characteristics (e.g., study design, risk of bias) used to order the studies, in the text and any tables or graphs, clearly referencing the studies included        |                                                  |               |
| <i>Results</i>                                                         |                                                                                                                                                                                                                                                                                                              |                                                  |               |
| <b>8</b> Reporting results                                             | For each comparison and outcome, provide a description of the synthesised findings, and the certainty of the findings. Describe the result in language that is consistent with the question the synthesis addresses, and indicate which studies contribute to the synthesis                                  |                                                  |               |
| <i>Discussion</i>                                                      |                                                                                                                                                                                                                                                                                                              |                                                  |               |
| <b>9</b> Limitations of the synthesis                                  | Report the limitations of the synthesis methods used and/or the groupings used in the synthesis, and how these affect the conclusions that can be drawn in relation to the original review question                                                                                                          |                                                  |               |

|  |  |  |  |
|--|--|--|--|
|  |  |  |  |
|--|--|--|--|

PRISMA=Preferred Reporting Items for Systematic Reviews and Meta-Analyses.

\* If the information is not provided in the systematic review, give details of where this information is available (eg, protocol, other published papers (provide citation details), or website (provide the URL)).

## ENTREQ checklist (Enhancing transparency in reporting the synthesis of qualitative research)

| Item No.                      | Guide and Description                                                                                                                                                                                                                                                                                                                                                                          | Report Location                                                                                |
|-------------------------------|------------------------------------------------------------------------------------------------------------------------------------------------------------------------------------------------------------------------------------------------------------------------------------------------------------------------------------------------------------------------------------------------|------------------------------------------------------------------------------------------------|
| 1. Aim                        | State the research question the synthesis addresses                                                                                                                                                                                                                                                                                                                                            | Introduction                                                                                   |
| 2. Synthesis methodology      | Identify the synthesis methodology or theoretical framework which underpins the synthesis, and describe the rationale for choice of methodology (e.g. meta-ethnography, thematic synthesis, critical interpretive synthesis, grounded theory synthesis, realist synthesis, meta-aggregation, meta-study, framework synthesis)                                                                  | Methodology of synthesis                                                                       |
| 3. Approach to searching      | Indicate whether the search was pre-planned (comprehensive search strategies to seek all available studies) or iterative (to seek all available concepts until they theoretical saturation is achieved)                                                                                                                                                                                        | Study search strategy and process - <i>SPIDER</i>                                              |
| 4. Inclusion criteria         | Specify the inclusion/exclusion criteria (e.g. in terms of population, language, year limits, type of publication, study type)                                                                                                                                                                                                                                                                 | Literature search and selection - <i>Inclusion criteria</i>                                    |
| 5. Data sources               | Describe the information sources used (e.g. electronic databases (MEDLINE, EMBASE, CINAHL, psycINFO), grey literature databases (digital thesis, policy reports), relevant organisational websites, experts, information specialists, generic web searches (Google Scholar) hand searching, reference lists) and when the searches conducted; provide the rationale for using the data sources | Study search strategy and process – <i>Electronic searches &amp; searching other resources</i> |
| 6. Electronic Search strategy | Describe the literature search (e.g. provide electronic search strategies with population terms, clinical or health topic terms, experiential or social phenomena related terms, filters for qualitative research, and search limits)                                                                                                                                                          | S1 – <i>SPIDER Table of terms and search strategy</i>                                          |
| 7. Study screening methods    | Describe the process of study screening and sifting (e.g. title, abstract and full text review, number of independent reviewers who screened studies)                                                                                                                                                                                                                                          | Study selection – <i>Fig 1 PRISMA flow diagram</i>                                             |
| 8. Study characteristics      | Present the characteristics of the included studies (e.g. year of publication, country, population, number of participants, data collection, methodology, analysis, research questions)                                                                                                                                                                                                        | Table 1 - <i>Characteristics of included studies</i>                                           |

|                             |                                                                                                                                                                                                                                                                                                                                                                                         |                                                                                  |
|-----------------------------|-----------------------------------------------------------------------------------------------------------------------------------------------------------------------------------------------------------------------------------------------------------------------------------------------------------------------------------------------------------------------------------------|----------------------------------------------------------------------------------|
| 9. Study selection results  | Identify the number of studies screened and provide reasons for study exclusion (e.g. for comprehensive searching, provide numbers of studies screened and reasons for exclusion indicated in a figure/flowchart; for iterative searching describe reasons for study exclusion and inclusion based on modifications to the research question and/or contribution to theory development) | Fig 1 - PRISMA flow diagram                                                      |
| 10. Rationale for appraisal | Describe the rationale and approach used to appraise the included studies or selected findings (e.g. assessment of conduct (validity and robustness), assessment of reporting (transparency), assessment of content and utility of the findings)                                                                                                                                        | Appraisal of the methodological limitations of included studies                  |
| 11. Appraisal items         | State the tools, frameworks and criteria used to appraise the studies or selected findings (e.g. Existing tools: CASP, QARI, COREQ, Mays and Pope [25]; reviewer developed tools; describe the domains assessed: research team, study design, data analysis and interpretations, reporting)                                                                                             | Appraisal of the methodological limitations of included studies - CASP           |
| 12. Appraisal process       | Indicate whether the appraisal was conducted independently by more than one reviewer and if consensus was required                                                                                                                                                                                                                                                                      | Appraisal of the methodological limitations of included studies                  |
| 13. Appraisal results       | Present results of the quality assessment and indicate which articles, if any, were weighted/excluded based on the assessment and give the rationale                                                                                                                                                                                                                                    | Appraisal of the methodological limitations of included studies – S2 Table. CASP |
| 14. Data extraction         | Indicate which sections of the primary studies were analysed and how were the data extracted from the primary studies? (e.g. all text under the headings “results /conclusions” were extracted electronically and entered into a computer software)                                                                                                                                     | Methodology of synthesis – “ <i>all relevant qualitative data</i> ”              |
| 15. Software                | State the computer software used, if any                                                                                                                                                                                                                                                                                                                                                | None used                                                                        |
| 16. Number of reviewers     | Identify who was involved in coding and analysis                                                                                                                                                                                                                                                                                                                                        | Methodology of synthesis                                                         |
| 17. Coding                  | Describe the process for coding of data (e.g. line by line coding to search for concepts)                                                                                                                                                                                                                                                                                               | Methodology of synthesis                                                         |
| 18. Study comparison        | Describe how were comparisons made within and across studies (e.g. subsequent studies were coded                                                                                                                                                                                                                                                                                        | Findings mapped to                                                               |



|                          |                                                                                                                                                                                                                              |                                                                         |
|--------------------------|------------------------------------------------------------------------------------------------------------------------------------------------------------------------------------------------------------------------------|-------------------------------------------------------------------------|
|                          | into pre-existing concepts, and new concepts were created when deemed necessary)                                                                                                                                             | <i>Theme Matrix</i> table                                               |
| 19. Derivation of themes | Explain whether the process of deriving the themes or constructs was inductive or deductive                                                                                                                                  | Inductive process - <i>Theme Matrix</i> table                           |
| 20. Quotations           | Provide quotations from the primary studies to illustrate themes/constructs, and identify whether the quotations were participant quotations of the author's interpretation                                                  | Findings - <i>Quotations and all sources given</i>                      |
| 21. Synthesis output     | Present rich, compelling and useful results that go beyond a summary of the primary studies (e.g. new interpretation, models of evidence, conceptual models, analytical framework, development of a new theory or construct) | Discussion - <i>highlights the generation and development of theory</i> |

## File S2. Human Mobility Transition.

### Urbanization, economic growth, economic and political power concentration, financialization

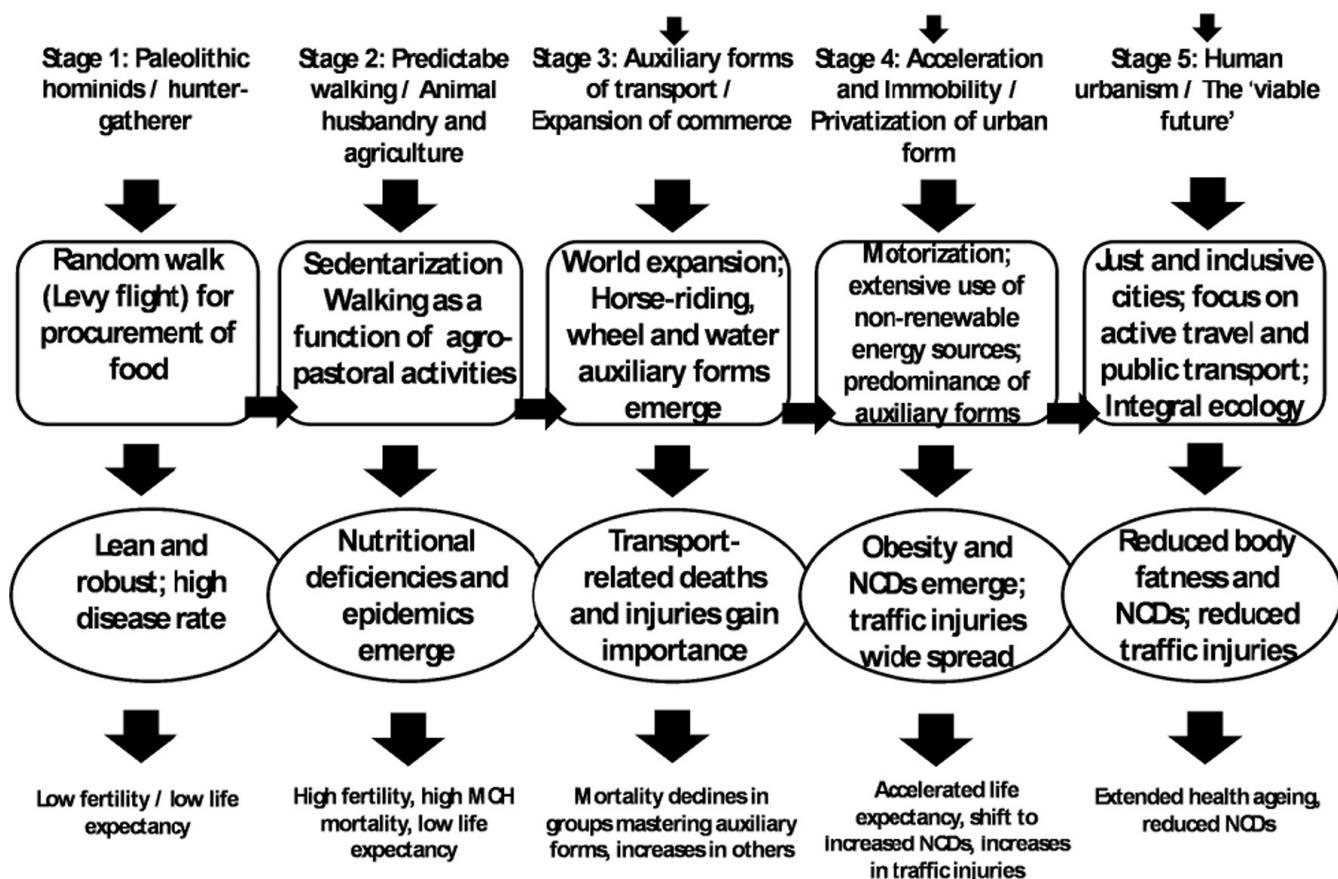

**Figure S2.** Stages of the Human Mobility Transition.

Reproduced with permission from corresponding author, Thiago Hérick de Sá, in article *Right to the City and Human Mobility Transition: The Case of São Paulo* published by Cities, Elsevier, 2019.

**File S3. Eligible countries.**

| Caribbean countries: |                              | African countries: |                              |
|----------------------|------------------------------|--------------------|------------------------------|
| Cuba                 | United States Virgin Islands | Algeria            | Gabon                        |
| Haiti                | Grenada                      | Angola             | Gambia                       |
| Dominican Republic   | Antigua                      | Benin              | Ghana                        |
| Jamaica              | Barbuda                      | Botswana           | Guinea                       |
| Trinidad             | Dominica                     | Burkina Faso       | Guinea Bissau                |
| Tobago               | Cayman Islands               | Burundi            | Ivory Coast or Cote d Ivoire |
| Guadeloupe           | Saint Kitts                  | Cameroon           | Jamahiriya                   |
| Martinique           | Nevis                        | Canary Islands     | Kenya                        |
| Bahamas              | Sint Maarten                 | Cape Verde         | Lesotho                      |
| Barbados             | Turks                        | Chad               | Liberia                      |
| Saint Lucia          | Caicos Islands               | Comoros            | Libya                        |
| Curacao              | Saint Martin                 | Congo              | Madagascar                   |
| Aruba                | British Virgin Islands       | Djibouti           | Malawi                       |
| Saint Vincent        | Caribbean Netherlands        | Egypt              | Mali                         |
| Grenadines           | Anguilla                     | Equatorial Guinea  | Mauritania                   |
| Saint Barthelemy     | Montserrat                   | Eritrea            | Mauritius                    |
| Belize               | Bermuda                      | Ethiopia           | Mayotte                      |
| Guyana               | Suriname                     | Sao Tome           | Senegal                      |
| Virgin Islands       | Antilles                     | Seychelles         | Sierra Leone                 |
| Bonaire              | Panama                       | Somalia            | St Helena                    |
| Caricom              |                              | Sudan              | Swaziland                    |
|                      |                              | Tanzania           | Togo                         |
|                      |                              | Tunisia            | Uganda                       |
|                      |                              | Western Sahara     | Zaire                        |
|                      |                              | Zambia             | Zimbabwe                     |

## **File S4. Electronic database search strategies for three databases.**

### **Search strategy for MEDLINE database**

Access through Open Athens: MEDLINE - Ovid MEDLINE(R) and Epub Ahead of Print, In-Process & Other Non-Indexed Citations and Daily

#### **Exposure**

1. determinants or determinant or associations or association or correlation or correlations or influenc\*.mp
2. exp Risk Factors/ or risk factor\*.mp
3. exp POLICY/ or policy or policies or legislat\* or law or laws.mp
4. exp ENVIRONMENT/ or exp ENVIRONMENT DESIGN/ or environment\*.mp
5. exhaust fume\* or emission\*.mp
6. exp Vehicle Emissions/
7. exp Traffic-Related Pollution/
8. infrastructur\* or neighbo?rhood or rural or countryside\* or suburban or sub-urban or settlement\* or village\* or urban or town or towns or city or cities or slum or slums or pollutant\* or pollution or polluted or (air adj3 quality) or weather or climate.mp
9. exp SOCIAL ENVIRONMENT/ or exp Culture/ or cultur\*.mp
10. social network\* or psychosocial\*.mp
11. exp Ethnic Groups/
12. age or sex or gender or ethnic\*.mp
13. exp Age Factors/
14. exp Sex/ or exp Sex Factors/
15. exp Demography/ or demograph\*.mp
16. exp SOCIOECONOMIC FACTORS/ or socioeconomic\* or socio-economic\*.mp
17. exp Employment/
18. exp Social Networking/
19. education or qualifi\* or profession\* or unskilled or skilled or income\* or wage or wages or salary or salaries or occupation\* or job or jobs or employ\* or unemploy\* or price\* or cost\*.mp

20. 1 or 2 or 3 or 4 or 5 or 6 or 7 or 8 or 9 or 10 or 11 or 12 or 13 or 14 or 15 or 16 or 17 or 18 or 19

## Outcome

21. exp Transportation/ or transport\* or travel\* or traffic or transit or paratransit or para-transit or commut\*.mp

22. exp Transportation/ and mobility.mp

23. "active mode" or "active modes".mp

24. "sedentary mode" or "sedentary modes".mp

25. exp Walking/ or walk\* or pedestrian\*.mp

26. exp Bicycling/ or bike or bikes or bicycle or bicycling or bicyclist or biking.mp

27. exp MOTOR VEHICLES/ or automobile\* or taxi or taxis or truck or trucks.mp

28. subway or subways or underground or metro or train or trains or rail\* or tram or trams or bus or buses or busses or minibus\* or minivan\*.mp

29. motor-cycl\* or motorcycl\* or motor-bik\* or motorbik\* or scooter\* or moped\* or moto or motocycl\* or motocicl\*.mp

30. rickshaw\* or auto-rickshaw\* or autorickshaw\* or "two-wheeler".mp

31. boat\* or ferry or ferries.mp

32. matatu or tuktuk\* or tuk-tuk\* or bodaboda\* or boda-boda\*.mp

33. "International Physical Activity Questionnaire" or IPAQ or "Global Physical Activity Questionnaire" or GPAQ.mp

34. domain adj3 physical activity.mp

35. pattern\* adj3 physical activity.mp

36. 21 or 22 or 23 or 24 or 25 or 26 or 27 or 28 or 29 or 30 or 31 or 32 or 33 or 34 or 35

## Population

37. Developing Countries/

38. (developing or "less\* developed" or "under-developed" or underdeveloped or middle-income or low-income or lower-income or underserved or "under-served" or deprived or poor\*) adj (countr\* or nation\* or population\* or world).mp

39. (developing or "less\* developed" or "under-developed" or underdeveloped or middle-income or low-income or lower-income or underserved or "under-served" or deprived or poor\*) adj (economy or economies).mp
40. low\* adj (gdp or gnp or "gross domestic" or "gross national").mp
41. low\* adj3 middle adj3 countr\*.mp
42. lmic or lmics or "third world" or "lami countr\*".mp
43. "transitional countr\*".mp
44. Africa or African or Caribbean or "West Indies".mp
45. exp Africa/ or exp Caribbean Region or exp West Indies/
46. Algeria or Angola or Benin or Botswana or "Burkina Faso" or Burundi or Cameroon or "Canary Islands" or "Cape Verde" or Chad or Comoros or Congo or Djibouti or Egypt or "Equatorial Guinea" or Eritrea or Ethiopia or Gabon or Gambia or Ghana or Guinea or Guinea Bissau or "Ivory Coast" or "Cote d'Ivoire" or Jamahiriya or Kenya or Lesotho or Liberia or Libya or Madagascar or Malawi or Mali or Mauritania or Mauritius or Mayotte or Morocco or Mozambique or Namibia or Niger or Nigeria or Principe or Reunion or Rwanda or "Sao Tome" or Senegal or Seychelles or "Sierra Leone" or Somalia or "St Helena" or Sudan or Swaziland or Tanzania or Togo or Tunisia or Uganda or "Western Sahara" or Zaire or Zambia or Zimbabwe.mpp
47. Cuba or Haiti or "Dominican Republic" or "Puerto Rico" or Jamaica or Trinidad or Tobago or Guadeloupe or Martinique or Bahamas or Barbados or "Saint Lucia" or Curacao or Aruba or "Saint Vincent" or Grenadines or "United States Virgin Islands" or Grenada or Antigua or Barbuda or Dominica or "Cayman Islands" or "Saint Kitts" or Nevis or "Sint Maarten" or Turks or "Caicos Islands" or "Saint Martin" or "British Virgin Islands" or "Caribbean Netherlands" or Anguilla or "Saint Barthelemy" or Montserrat or Belize or Bermuda or Guyana or Suriname or "Virgin Islands" or Antilles or Bonaire or Panama or Caricom.mpp
48. 37 or 38 or 39 or 40 or 41 or 42 or 43 or 44 or 45 or 46 or 47
49. 20 and 36 and 48
50. HIV or "human immunodeficiency virus" or tuberculosis or TB or ebola or zika or malaria or pregnancy or pregnant or matern\* or obstetric\* or abortion or contracept\* or midwife or midwives or postnatal or "sexual health" or "reproductive health".mp
51. 49 NOT 50
52. limit 51 to (yr="2008 -Current")
53. limit 52 to (male or female or humans)

## Search strategy for TRID database

Access through: <https://trid.trb.org/>:

TRID - CUSTOM FILTERS: between dates 2008 - 2019 (An expanded search was done for each Index Term used)

### Exposure

1. (Keywords) determinants or determinant or associations or association or correlation or correlations or influenc\*
2. (Keywords) "risk factor"
3. (Index Term) Policy --> (Keywords) NN:Cra\*
4. (Keywords) policy or policies or legislat\* or law or laws
5. (Index Term) Environment, Environmental design, Built environment --> (Keywords) NN:J\* or NN:Ttn\* or NN:Eb\*
6. (Keywords) environment\*
7. (Keywords) "exhaust fume\*" or emission\*
8. (Keywords) "vehicle emissions"
9. (Keywords) "traffic-related pollution"
10. (Keywords) infrastructur\* or neighbourhood or neighborhood or rural or countryside\* or suburban or sub-urban or settlement\* or village\* or urban or town or towns or city or cities or slum or slums or pollutant\* or pollution or polluted or weather or climate
11. (Keywords) "Air quality"
12. (Index Term) Culture (Social sciences) --> (Keywords) NN:Khr\*
13. (Keywords) cultur\*
14. (Keywords) "social network\*" or psychosocial\*
15. (Keywords) age or sex or gender or ethnic\*
16. (Index Term) Age Groups --> (Keywords) NN:Mb\*
17. (Index Term) Ethnic Groups --> (Keywords) NN:Mha\*
18. (Index Term) Population --> (Keywords) NN:Khb\*
19. (Keywords) demograph\*

20.(Index Term) Socioeconomic factors --> (Keywords) NN:Kj\*

21.(Keywords) socioeconomic\* or socio-economic\*

22.(Index Term) Employment --> (Keywords) NN:Kabkp\*

23.(Keywords) education or qualifi\* or profession\* or unskilled or skilled or income\* or wage or wages or salary or salaries or occupation\* or job or jobs or employ\* or unemploy\* or price\* or cost\*

24. 1 or 2 or 3 or 4 or 5 or 6 or 7 or 8 or 9 or 10 or 11 or 12 or 13 or 14 or 15 or 16 or 17 or 18 or 18 or 20 or 21 or 22 or 23

## Outcome

25. (Index Term) Transportation --> (Keywords) NN:A

26. (Keywords) transport\* or travel\* or traffic or transit or paratransit or para-transit or commut\*

27. (Index Term) Transportation --> (Keywords) NN:A AND mobility

28. (Keywords) "active mode" or "active modes"

29. (Keywords) "sedentary mode" or "sedentary modes"

30. (Index Term) Walking, Walking distance --> (Keywords) NN:Aexw\* or NN:Bxw\*

31. (Keywords) walk\* or pedestrian\*

32. (Index Term) Bicycling --> (Keywords) NN:Aexb\*

33. (Keywords) bicycling or cycle or cycles or bike or bikes or bicycle or bicyclist or biking

34. (Index Term) Motor vehicles --> (Keywords) NN:Qbdd\*

35. (Keywords) automobile\* or taxi or taxis or truck or trucks or car or cars

36. (Keywords) subway or subways or underground or metro or train or trains or rail\* or tram or trams or bus or buses or busses or minibus\* or minivan\*

37. (Keywords) motor-cycl\* or motorcycl\* or motor-bik\* or motorbik\* or scooter\* or moped\* or moto or motocycl\* or motocicl\*

38. (Keywords) rickshaw\* or auto-rickshaw\* or autorickshaw\* or two-wheeler\*

39. (Keywords) boat\* or ferry or ferries

40. (Keywords) matatu or tuktuk\* or tuk-tuk\* or bodaboda\* or boda-boda\*

41. (Keywords) "International Physical Activity Questionnaire\*" or IPAQ or "International Physical Activity Questionnaire\*" or "Global Physical Activity Questionnaire\*" or GPAQ or "Global Physical Activity Questionnaire"
  42. (Keywords) domain\* and "physical activity"
  43. (Keywords) pattern\* and "physical activity"
  44. 25 or 26 or 27 or 28 or 29 or 30 or 31 or 32 or 33 or 34 or 35 or 36 or 37 or 38 or 39 or 40 or 41 or 42 or 43
- Population
45. (Index Term) Developing countries --> (Keywords) NN:Vwad\*
  46. (Keywords) "developing countr\*" or "less\* developed countr\*" or "under-developed countr\*" or "underdeveloped countr\*" or "middle-income countr\*" or "low-income countr\*" or "lower-income countr\*" or "underserved countr\*" or "under-served countr\*" or "deprived countr\*" or "poor\* countr"
  47. (Keywords) "developing nation\*" or "less\* developed nation\*" or "under-developed nation\*" or "underdeveloped nation\*" or "middle-income nation\*" or "low-income nation\*" or "lower-income nation\*" or "underserved nation\*" or "under-served nation\*" or "deprived nation\*" or "poor\* nation"
  48. (Keywords) "developing population\*" or "less\* developed population\*" or "under-developed population\*" or "underdeveloped population\*" or "middle-income population\*" or "low-income population\*" or "lower-income population\*" or "underserved population\*" or "under-served population\*" or "deprived population\*" or "poor\* population"
  49. (Keywords) "developing world" or "less\* developed world" or "under-developed world" or "underdeveloped world" or "middle-income world" or "low-income world" or "lower-income world" or "underserved world" or "under-served world" or "deprived world" or "poor\* world"
  50. (Keywords) "developing econom\*" or "less\* developed econom\*" or "under-developed econom\*" or "underdeveloped econom\*" or "middle-income econom\*" or "low-income econom\*" or "lower-income econom\*" or "underserved econom\*" or "under-served econom\*" or "deprived econom\*" or "poor\* econom"
  51. (Keywords) "low\* gdp"
  52. (Keywords) "low\* gnp"
  53. (Keywords) "low\* gross domestic"
  54. (Keywords) "low\* gross national"
  55. (Keywords) "low\* middle" and count\*
  56. (Keywords) lmic or lmic\* or "third world" or "lami countr"
  57. (Keywords) "transitional countr"
  58. (Keywords) Africa or African or Caribbean or "West Indies"



59. (Keywords) Algeria or Angola or Benin or Botswana or "Burkina Faso" or Burundi or Cameroon or "Canary Islands" or "Cape Verde" or Chad or Comoros or Congo or Djibouti or Egypt or "Equatorial Guinea" or Eritrea or Ethiopia or Gabon or Gambia or Ghana or Guinea or Guinea Bissau or "Ivory Coast" or "Cote d'Ivoire" or Jamahiriya or Jamahiriya or Kenya or Lesotho or Liberia or Libya or Madagascar or Malawi or Mali or Mauritania or Mauritius or Mayotte or Morocco or Mozambique or Namibia or Niger or Nigeria or Principe or Reunion or Rwanda or "Sao Tome" or Senegal or Seychelles or "Sierra Leone" or Somalia or "St Helena" or Sudan or Swaziland or Tanzania or Togo or Tunisia or Uganda or "Western Sahara" or Zaire or Zambia or Zimbabwe

60. (Keywords) Cuba or Haiti or "Dominican Republic" or "Puerto Rico" or Jamaica or Trinidad or Tobago) or Guadeloupe or Martinique or Bahamas or Barbados or "Saint Lucia" or Curacao or Aruba or "Saint Vincent" or Grenadines or "United States Virgin Islands" or Grenada or Antigua or Barbuda or Dominica or "Cayman Islands" or "Saint Kitts" or Nevis or "Sint Maarten" or Turks or "Caicos Islands" or "Saint Martin" or "British Virgin Islands" or "Caribbean Netherlands" or Anguilla or "Saint Barthelemy" or Montserrat or Belize or Bermuda or Guyana or Suriname or "Virgin Islands" or Antilles or Bonaire or Panama or Caricom

61. 45 or 46 or 47 or 48 or 49 or 50 or 51 or 52 or 53 or 54 or 55 or 56 or 57 or 58 or 59 or 60

62. HIV or "human immunodeficiency virus" or tuberculosis or TB or ebola or zika or malaria or pregnancy or pregnant or matern\* or obstetric\* or abortion or contracept\* or midwife or midwives or postnatal or "sexual health" or "reproductive health"

63. (24 and 44 and 61) NOT 62

\*\*\*\*\* no other limits applied \*\*\*\*\*

### **Search strategy for SCOPUS database**

Access through: Cambridge LibGuides

Exposure

1. TITLE-ABS-KEY determinant or association or correlation or influenc\*
2. TITLE-ABS-KEY "risk factor"
3. TITLE-ABS-KEY policy or legislat\* or law
4. TITLE-ABS-KEY environment\*
5. TITLE-ABS-KEY "exhaust fume" or emission
6. TITLE-ABS-KEY "vehicle emission"
7. TITLE-ABS-KEY "traffic-related pollution"

8. TITLE-ABS-KEY infrastru\* or neighborhood or rural or countryside or suburban or sub-urban or settlement or village or urban or town or city or slum or pollutant or pollution or polluted or (air w/3 quality) or weather or climate
9. TITLE-ABS-KEY "social environment" or cultur\*
10. TITLE-ABS-KEY "social network\*" or psychosocial\*
11. TITLE-ABS-KEY age or sex or gender or ethnic\*
12. TITLE-ABS-KEY demograph\*
13. TITLE-ABS-KEY socioeconomic\*
14. TITLE-ABS-KEY education or qualifi\* or profession\* or unskilled or skilled or income\* or wage or salary or occupation\* or job or employ\* or unemploy\* or price\* or cost\*
15. 1 or 2 or 3 or 4 or 5 or 6 or 7 or 8 or 9 or 10 or 11 or 12 or 13 or 14

#### Outcome

16. TITLE-ABS-KEY transport\* or travel\* or traffic or transit or paratransit or commut\*
17. TITLE-ABS-KEY transportation AND mobility
18. TITLE-ABS-KEY {active mode} or {active modes}
19. TITLE-ABS-KEY {sedentary mode} or {sedentary modes}
20. TITLE-ABS-KEY walk\* or pedestrian\*
21. TITLE-ABS-KEY bike or bicycle or bicycling or bicyclist or biking
22. TITLE-ABS-KEY "motor vehicle" or automobile or taxi or truck
23. TITLE-ABS-KEY subway or underground or metro or train or rail\* or tram or bus or minibus\* or minivan\*
24. TITLE-ABS-KEY motor-cycl\* or motorcycl\* or motor-bik\* or motorbik\* or scooter\* or moped\* or moto or motocycl\* or motocicl\*
25. TITLE-ABS-KEY rickshaw\* or auto-rickshaw\* or autorickshaw\* or two-wheeler\*
26. TITLE-ABS-KEY boat\* or ferry
27. TITLE-ABS-KEY matatu or tuktuk\* or "tuk-tuk\*" or bodaboda\* or "boda-boda"
28. TITLE-ABS-KEY "International Physical Activity Questionnaire\*" or IPAQ or "Global Physical Activity Questionnaire\*" or GPAQ

29. TITLE-ABS-KEY domain w/3 "physical activity"

30. TITLE-ABS-KEY pattern\* w/3 "physical activity"

31. 16 or 17 or 18 or 19 or 20 or 21 or 22 or 23 or 24 or 25 or 26 or 27 or 28 or 29 or 30

## Population

32. TITLE-ABS-KEY (developing or "less\* developed" or "under developed" or underdeveloped or "middle-income" or "low\*-income" or underserved or "under-served" or deprived or poor\*) pre/1 (countr\* or nation\* or population\* or world)

33. TITLE-ABS-KEY (developing or "less\* developed" or "under developed" or underdeveloped or "middle-income" or "low\*-income" or underserved or "under-served" or deprived or poor\*) pre/1 (economy or economies)

34. TITLE-ABS-KEY low\* pre/1 (gdp or gnp or {gross domestic} or {gross national})

35. TITLE-ABS-KEY low\* w/3 middle w/3 countr\*

36. TITLE-ABS-KEY lmic or lmic\* or {third world} or "lami countr\*"

37. TITLE-ABS-KEY "transitional countr\*"

38. TITLE-ABS-KEY Africa or African or Caribbean or {West Indies}

39. TITLE-ABS-KEY (Algeria or Angola or Benin or Botswana or {Burkina Faso} or Burundi or Cameroon or {Canary Islands} or {Cape Verde} or Chad or Comoros or Congo or Djibouti or Egypt or {Equatorial Guinea} or Eritrea or Ethiopia or Gabon or Gambia or Ghana or Guinea or {Guinea Bissau} or {Ivory Coast} or {Cote d'Ivoire} or Jamahiriya or Kenya or Lesotho or Liberia or Libya or Madagascar or Malawi or Mali or Mauritania or Mauritius or Mayotte or Morocco or Mozambique or Namibia or Niger or Nigeria or Principe or Reunion or Rwanda or {Sao Tome} or Senegal or Seychelles or {Sierra Leone} or Somalia or {St Helena} or Sudan or Swaziland or Tanzania or Togo or Tunisia or Uganda or {Western Sahara} or Zaire or Zambia or Zimbabwe)

40. TITLE-ABS-KEY (Cuba or Haiti or {Dominican Republic} or {Puerto Rico} or Jamaica or Trinidad or Tobago or Guadeloupe or Martinique or Bahamas or Barbados or {Saint Lucia} or Curacao or Aruba or {Saint Vincent} or Grenadines or {United States Virgin Islands} or Grenada or Antigua or Barbuda or Dominica or {Cayman Islands} or {Saint Kitts} or Nevis or {Sint Maarten} or Turks or {Caicos Islands} or {Saint Martin} or {British Virgin Islands} or {Caribbean Netherlands} or Anguilla or {Saint Barthelemy} or Montserrat or Belize or Bermuda or Guyana or Suriname or {Virgin Islands} or Antilles or Bonaire or Panama or Caricom)

41. 32 or 33 or 34 or 35 or 36 or 37 or 38 or 30 or 40

42. 15 and 31 and 41

43. 42 AND NOT (TITLE-ABS-KEY (HIV or {human immunodeficiency virus} or tuberculosis or TB or ebola or zika or malaria or pregnancy or pregnant or matern\* or obstetric\* or abortion or contracept\* or midwife or postnatal or {sexual health} or {reproductive health}))

44. limit 43 to (yr="2008 -Current")

45. With limit to male or female or humans

File S5. Data extraction template.

| Field                           | Standard or custom Covidence field | Format    | Notes                                                                                                                                                                                                                                                                                                                                                                                                       |
|---------------------------------|------------------------------------|-----------|-------------------------------------------------------------------------------------------------------------------------------------------------------------------------------------------------------------------------------------------------------------------------------------------------------------------------------------------------------------------------------------------------------------|
| <b>Identification</b>           |                                    |           |                                                                                                                                                                                                                                                                                                                                                                                                             |
| <b>Study details</b>            |                                    |           |                                                                                                                                                                                                                                                                                                                                                                                                             |
| Sponsorship source              | Standard                           | Free text | <p>Check whether a funding source is reported. Often this can be found in a section titled 'Acknowledgements' or 'Funding' or reported on the first page of the manuscript near the author information.</p> <p>Enter the funding source<br/>If more than one, list separated by a comma<br/>Otherwise enter 'no source reported'</p> <p><i>Example</i><br/>Medical Research Council, Heart Foundation</p>   |
| Country                         | Standard                           | Free text | <p>Enter the country where the data were collected<br/>If more than one, list separated by a comma</p> <p><i>Example</i><br/>Ghana</p>                                                                                                                                                                                                                                                                      |
| Setting                         | Standard                           | Free text | <p>Enter the setting where the data were collected<br/>If more than one, list separated by a comma<br/>If information given at different levels of geographical aggregation (e.g. region, city, district), list all this information and where possible give information on the level of aggregation in brackets</p> <p><i>Example</i><br/>Accra, Kumasi, Tamale, Sekondi-Takoradi (metropolitan areas)</p> |
| Comments                        | Standard                           | Free text | Leave this field blank or use for general comments/queries arising                                                                                                                                                                                                                                                                                                                                          |
| <b>Author's contact details</b> |                                    |           |                                                                                                                                                                                                                                                                                                                                                                                                             |
| Author's name                   | Standard                           | Free text | <p>Enter the name of the first author<br/>Use the format [surname, initials]</p> <p><i>Example</i><br/>Abane, AB</p>                                                                                                                                                                                                                                                                                        |
| Institution                     | Standard                           | Free text | <p>Enter the institution or affiliation of the first author with the country of this affiliation in brackets<br/>If more than one, list separated by a comma</p> <p><i>Example</i><br/>University of Cape Coast (Ghana)</p>                                                                                                                                                                                 |
| Email                           | Standard                           | Free text | <p>Enter the email address of the first author<br/>If none provided enter 'email not provided'</p>                                                                                                                                                                                                                                                                                                          |

|                                |          |                          |                                                                                                                                                                                                                                                                                                                                                                                                                                                                                                                                                                                                                                                                                                                                                                                                                                                                                                                                                                                                                                                                                                   |
|--------------------------------|----------|--------------------------|---------------------------------------------------------------------------------------------------------------------------------------------------------------------------------------------------------------------------------------------------------------------------------------------------------------------------------------------------------------------------------------------------------------------------------------------------------------------------------------------------------------------------------------------------------------------------------------------------------------------------------------------------------------------------------------------------------------------------------------------------------------------------------------------------------------------------------------------------------------------------------------------------------------------------------------------------------------------------------------------------------------------------------------------------------------------------------------------------|
|                                |          |                          | <i>Example</i><br><a href="mailto:am_abane@yahoo.com">am_abane@yahoo.com</a>                                                                                                                                                                                                                                                                                                                                                                                                                                                                                                                                                                                                                                                                                                                                                                                                                                                                                                                                                                                                                      |
| Address                        | Standard | Free text                | Leave this field blank                                                                                                                                                                                                                                                                                                                                                                                                                                                                                                                                                                                                                                                                                                                                                                                                                                                                                                                                                                                                                                                                            |
| Additional identification data |          |                          |                                                                                                                                                                                                                                                                                                                                                                                                                                                                                                                                                                                                                                                                                                                                                                                                                                                                                                                                                                                                                                                                                                   |
| Country - first author         | Custom   | Free text                | Enter the country where the first author's institution or affiliation is located<br>If more than one, list the country of the first affiliation<br><br><i>Example</i><br>Kenya                                                                                                                                                                                                                                                                                                                                                                                                                                                                                                                                                                                                                                                                                                                                                                                                                                                                                                                    |
| Country - last author          | Custom   | Free text                | Enter the country where the last author's institution or affiliation is located<br>If more than one, list the country of the first affiliation<br>If the study has only one author, enter 'no last author'<br><br><i>Example</i><br>United States of America                                                                                                                                                                                                                                                                                                                                                                                                                                                                                                                                                                                                                                                                                                                                                                                                                                      |
| Data source                    | Custom   | Free text<br>Categorical | Enter the source of the data<br><br>Use the following categories:<br>If more than one, list separated by a comma<br><br><ul style="list-style-type: none"> <li>• Academic</li> <li>• Research Institute/Centre</li> <li>• Government</li> <li>• Private sector</li> <li>• International organisation</li> <li>• NGO</li> <li>• Other</li> </ul><br>Academic: research studies led by universities<br>Research Institute/Centre: research studies led by research groups which are part of a larger institution such as universities, hospitals, corporations, etc.<br>Government: routine monitoring such as national surveys or traffic monitoring<br>Private sector: research studies led by industry, private companies, consultancy firms, etc.<br>International organisation: research studies led by organisations such as WHO, World Bank, FAO, UN, etc.<br>NGO: research studies led by non-profit, non-governmental organisations<br>Other: enter other type of source of data not listed above<br><br><i>Example</i><br>Academic, Research Institute/Centre, International organisation |

|                                |          |                          |                                                                                                                                                                                                                                                                                                                                                                                                                                                                                                                                                                                                                                                                                                                          |
|--------------------------------|----------|--------------------------|--------------------------------------------------------------------------------------------------------------------------------------------------------------------------------------------------------------------------------------------------------------------------------------------------------------------------------------------------------------------------------------------------------------------------------------------------------------------------------------------------------------------------------------------------------------------------------------------------------------------------------------------------------------------------------------------------------------------------|
| Date - data collection         | Custom   | Free text                | <p>Enter the start and end year of data collection</p> <p>If data collection was completed within one year, enter the year only</p> <p>If one discrete period of data collection spanned multiple years, enter the start and end year separated by a dash</p> <p>If there were multiple discrete periods of data collection (e.g. in a longitudinal cohort that had a baseline and follow-up data collection), enter the years separated by a comma</p> <p><i>Examples</i></p> <p>2014</p> <p>2014-2015 (one discrete period of data collection)</p> <p>2014, 2017 (multiple periods of data collection e.g. cohort)</p> <p>2015-2015, 2017-2018 (multiple periods of data collection, each spanning multiple years)</p> |
| Date - publication             | Custom   | Free text                | <p>Enter the year that the study was published</p> <p><i>Example</i></p> <p>2014</p>                                                                                                                                                                                                                                                                                                                                                                                                                                                                                                                                                                                                                                     |
| GDAR - work package 1b         | Custom   | Free text                | <p>Enter 'WP1flag' if the study uses spatial assessment, or provides information on transportation patterns, physical activity patterns, road traffic accidents, air pollution, demographics or health outcomes</p> <p>Otherwise enter 'none'</p>                                                                                                                                                                                                                                                                                                                                                                                                                                                                        |
| GDAR - work package 3          | Custom   | Free text                | <p>Enter 'WP3flag' if the study refers to policy in South Africa, Kenya, Cameroon or Jamaica, and provides information on the sector of origin of the policy such as health or transport</p> <p>Otherwise enter 'none'</p>                                                                                                                                                                                                                                                                                                                                                                                                                                                                                               |
| Equity                         | Custom   | Free text                | <p>Enter 'equityflag' if the study explores gender or sex differences in travel behaviour, or differences by socioeconomic status to inform an equity analysis</p> <p>Otherwise enter 'none'</p>                                                                                                                                                                                                                                                                                                                                                                                                                                                                                                                         |
| <b>Methods</b>                 |          |                          |                                                                                                                                                                                                                                                                                                                                                                                                                                                                                                                                                                                                                                                                                                                          |
| Design                         |          |                          | Leave this field blank                                                                                                                                                                                                                                                                                                                                                                                                                                                                                                                                                                                                                                                                                                   |
| Additional methods data        |          |                          |                                                                                                                                                                                                                                                                                                                                                                                                                                                                                                                                                                                                                                                                                                                          |
| A. Research type               | Standard | Categorical              | <p>Enter the research type:</p> <p>Use ONE of the following categories:</p> <ul style="list-style-type: none"> <li>Quantitative</li> <li>Qualitative</li> <li>Mixed method</li> </ul> <p>Quantitative: measures of values or counts expressed as numbers e.g. the data generated from surveys, questionnaires, measurements</p> <p>Qualitative: description of phenomena often expressed as text e.g. interviews, focus groups</p> <p>Mixed method: Both quantitative and qualitative methods used</p>                                                                                                                                                                                                                   |
| B. Study design - quantitative | Custom   | Free text<br>Categorical | Enter the study design.                                                                                                                                                                                                                                                                                                                                                                                                                                                                                                                                                                                                                                                                                                  |

|                                |        |                          |                                                                                                                                                                                                                                                                                                                                                                                                                                                                                                                                                                                                                                                                                                                                                          |
|--------------------------------|--------|--------------------------|----------------------------------------------------------------------------------------------------------------------------------------------------------------------------------------------------------------------------------------------------------------------------------------------------------------------------------------------------------------------------------------------------------------------------------------------------------------------------------------------------------------------------------------------------------------------------------------------------------------------------------------------------------------------------------------------------------------------------------------------------------|
|                                |        |                          | <p>Quantitative or mixed method study - use ONE of the following categories:</p> <ul style="list-style-type: none"> <li>• Randomised controlled trial</li> <li>• Cohort study</li> <li>• Case-control study</li> <li>• Cross sectional study</li> <li>• Case report / Case study</li> <li>• Other – please, specify</li> </ul> <p>For quantitative or mixed method studies, complete this field.<br/>Otherwise (i.e. for qualitative studies) enter 'not applicable'</p>                                                                                                                                                                                                                                                                                 |
| C. Study design - qualitative  | Custom | Free text<br>Categorical | <p>Enter the study design.</p> <p>Qualitative or mixed method study – use ONE of the following categories:</p> <ul style="list-style-type: none"> <li>• Grounded theory</li> <li>• Case study</li> <li>• Historical / Narratives</li> <li>• Participatory research / Action research</li> <li>• Phenomenology</li> <li>• Ethnography / Observation</li> <li>• Other – please, specify</li> </ul> <p>Ethnography: Immersion of the researcher the participants' environment, typically through observation (note, do not confuse this design with observational quantitative designs like traffic counting)</p> <p>For qualitative or mixed method studies, complete this field.<br/>Otherwise (i.e. for quantitative studies) enter 'not applicable'</p> |
| D. Study method – quantitative | Custom | Free text                | <p>If the study includes a quantitative element, enter the method type.</p> <p>Enter a small amount of free text summarising the study methods. This can usually be cut and pasted from the abstract.</p> <p><i>Examples</i><br/>Two-day vox pop survey, structured questionnaire at two main trip destinations<br/>STEPs survey<br/>Household survey and interview</p> <p>For quantitative or mixed method studies, complete this field.<br/>Otherwise (i.e. for qualitative studies) enter 'not applicable'</p>                                                                                                                                                                                                                                        |
| E. Study method - qualitative  | Custom | Free text<br>Categorical | <p>If the study includes a qualitative element, enter the method type.</p> <p>Use the following categories:<br/>If more than one, list separated by a comma</p>                                                                                                                                                                                                                                                                                                                                                                                                                                                                                                                                                                                          |



|                      |        |                          |                                                                                                                                                                                                                                                                                                                                                                                                                                                                                                                                                                                                                                                                                                                                                                                                                                                                                                                                                                                                                                   |
|----------------------|--------|--------------------------|-----------------------------------------------------------------------------------------------------------------------------------------------------------------------------------------------------------------------------------------------------------------------------------------------------------------------------------------------------------------------------------------------------------------------------------------------------------------------------------------------------------------------------------------------------------------------------------------------------------------------------------------------------------------------------------------------------------------------------------------------------------------------------------------------------------------------------------------------------------------------------------------------------------------------------------------------------------------------------------------------------------------------------------|
|                      |        |                          | <ul style="list-style-type: none"> <li>• Structured – interview , survey, questionnaire</li> <li>• Un-structured or Semi structured - interview , survey, questionnaire</li> <li>• In depth- interview / Key informants</li> <li>• Focus groups / Group discussions</li> <li>• Field Notes</li> <li>• Narrative descriptions</li> <li>• Audio tapes</li> <li>• Video tapes</li> <li>• Seasonal calendars</li> <li>• Transect walks</li> <li>• Participatory mapping / Modelling</li> <li>• Other– please, enter a small amount of free text summarising the study methods.</li> </ul> <p>For qualitative or mixed method studies, complete this field. Otherwise (i.e. for quantitative studies) enter 'not applicable'</p>                                                                                                                                                                                                                                                                                                       |
| F. Exposure category | Custom | Free text<br>Categorical | <p>Enter ALL of the categories of exposure that were assessed in the study.</p> <p>Use the following categories:<br/>If more than one, list separated by a comma</p> <ul style="list-style-type: none"> <li>• Individual characteristics</li> <li>• Travel mode characteristics</li> <li>• Built environment</li> <li>• Natural environment</li> <li>• Socio-cultural environment</li> <li>• Policy or wider environment</li> </ul> <p>See the 'Categories of exposure' (Table 1) in this document to help you decide which exposures should be listed.</p> <p>Exposures must be linked explicitly with travel behaviour outcomes, not just reported. E.g. A study might report the sex distribution of the sample (i.e. numbers of males and females), but to be considered an exposure the study needs to have examined how travel behaviour varies by sex (e.g. whether public transport use differs between males and females). For this example, the following category should be entered: 'Individual characteristics'.</p> |
| G. Exposure/s        | Custom | Free text                | Enter all of the exposures that were assessed in the study. See Table 1 to help you decide how to report exposures.                                                                                                                                                                                                                                                                                                                                                                                                                                                                                                                                                                                                                                                                                                                                                                                                                                                                                                               |
| H. Exposure methods  | Custom | Free text<br>Categorical | <p>Enter ONE of the methods of exposure that were assessed in the study:</p> <ul style="list-style-type: none"> <li>• Subjective</li> <li>• Objective</li> </ul>                                                                                                                                                                                                                                                                                                                                                                                                                                                                                                                                                                                                                                                                                                                                                                                                                                                                  |

|                                   |        |                          |                                                                                                                                                                                                                                                                                                                                                                                                                                                                                                                                                                                                                                                                                                                                                                                                                                                            |
|-----------------------------------|--------|--------------------------|------------------------------------------------------------------------------------------------------------------------------------------------------------------------------------------------------------------------------------------------------------------------------------------------------------------------------------------------------------------------------------------------------------------------------------------------------------------------------------------------------------------------------------------------------------------------------------------------------------------------------------------------------------------------------------------------------------------------------------------------------------------------------------------------------------------------------------------------------------|
|                                   |        |                          | <ul style="list-style-type: none"> <li>Both subjective and objective</li> </ul> <p>Subjective: Usually this means the participant has self-reported<br/>Objective: Observed by the researcher. For example, measured population density using census data, measured land use mix using geographical information systems</p>                                                                                                                                                                                                                                                                                                                                                                                                                                                                                                                                |
| I. Outcome/s                      | Custom | Free text<br>Categorical | <p>Enter ALL of the following outcomes that were assessed in the study:<br/>Enter all outcomes assessed from this list, separated by a comma.</p> <ul style="list-style-type: none"> <li>Time in all travel</li> <li>Time in active travel</li> <li>Time in travel modes or combinations of modes</li> <li>Number of trips/journeys</li> <li>Use of travel modes</li> <li>Choice of travel modes</li> <li>Travel mode share</li> <li>Mobility budget (percentage)</li> <li>Purpose of travel mode use</li> <li>Other – please, specify</li> </ul> <p>Active travel is commonly operationalised as walking only, cycling only, walking and cycling combined, or walking, cycling and public transport combined<br/>Enter all outcomes assessed from this list, separated by a comma</p> <p><i>Example</i><br/>Time in all travel, time in active travel</p> |
| J. Outcome methods                | Custom | Free text<br>Categorical | <p>Enter ONE of the methods of outcome that were assessed in the study:</p> <ul style="list-style-type: none"> <li>Subjective</li> <li>Objective</li> <li>Both subjective and objective</li> </ul> <p>Subjective: Usually this means the participant has self-reported<br/>Objective: Observed by the researcher. For example, counting people using particular travel modes</p>                                                                                                                                                                                                                                                                                                                                                                                                                                                                           |
| K. Analysis method - quantitative | Custom | Free text                | <p>Enter a small amount of free text summarising the analysis methods. For quantitative studies it is important to distinguish between basic statistical methods for assessing relationships (e.g. correlations) and those that account for potential confounding factors (e.g. multivariable regression modelling).</p> <p>For quantitative or mixed method studies, complete this field.<br/>Otherwise (i.e. for qualitative studies) enter 'not applicable'</p>                                                                                                                                                                                                                                                                                                                                                                                         |

|                                   |          |           |                                                                                                                                                                                                                                                                                                                                                                                                                                                                 |
|-----------------------------------|----------|-----------|-----------------------------------------------------------------------------------------------------------------------------------------------------------------------------------------------------------------------------------------------------------------------------------------------------------------------------------------------------------------------------------------------------------------------------------------------------------------|
| L. Analysis method - qualitative  | Custom   | Free text | <p>Enter a small amount of free text summarising the analysis methods, e.g. thematic analysis.</p> <p>For qualitative or mixed method studies, complete this field. Otherwise (i.e. for quantitative studies) enter 'not applicable'</p>                                                                                                                                                                                                                        |
| <b>Population</b>                 |          |           |                                                                                                                                                                                                                                                                                                                                                                                                                                                                 |
| Inclusion criteria                | Standard | Free text | <p>Enter a small amount of free text summarising the types of participants included in the study. This can usually be cut and pasted from the article.</p> <p><i>Example</i><br/>Data were collected from passengers waiting to board or actually on board vehicles operated by privately-owned and government-assisted transport systems in the four metropolitan areas under study.</p>                                                                       |
| Exclusion criteria                | Standard | Free text | <p>Enter a small amount of free text summarising the types of participants excluded from the study. This can usually be cut and pasted from the article.</p> <p>In many cases, there will be no explicit exclusion criteria listed. If this is the case, enter 'not reported'.</p> <p><i>Example</i><br/>Institutionalised individuals (e.g. hospitalised or jailed) were excluded from the study<br/>Participants with a diagnosis of cancer were excluded</p> |
| Group differences                 | Standard | Free text | <p>Enter a small amount of free text summarising whether there were any differences between participant groups at baseline. This only applies to studies that used a controlled experimental design (and it is likely that the majority of literature identified will not use this type of design). This can usually be cut and pasted from the article.</p> <p>If this does not apply, enter 'not applicable'.</p>                                             |
| <b>Additional population data</b> |          |           |                                                                                                                                                                                                                                                                                                                                                                                                                                                                 |
| 1. Sample size                    | Custom   | Free text | <p>Enter a small amount of free text describing the sample size</p> <p><i>Examples</i><br/>10,128 individuals<br/>100 households, 1 member of each household<br/>Ouagadougou - 754 households, 3682 individuals, Bamako - 251 households, 1666 individuals</p>                                                                                                                                                                                                  |
| 2. Response rate                  | Custom   | Free text | <p>Enter a small amount of free text describing the response rate, if provided. If reported, this is typically expressed as a percentage. It is likely that many studies will not provide this information.</p> <p>If not reported, enter 'not reported'</p> <p><i>Example</i></p>                                                                                                                                                                              |

|                               |        |           |                                                                                                                                                                                                                                                                                                                                                                                                                                                     |
|-------------------------------|--------|-----------|-----------------------------------------------------------------------------------------------------------------------------------------------------------------------------------------------------------------------------------------------------------------------------------------------------------------------------------------------------------------------------------------------------------------------------------------------------|
|                               |        |           | 78% response rate                                                                                                                                                                                                                                                                                                                                                                                                                                   |
| 3. Age                        | Custom | Free text | <p>Enter a small amount of free text describing the age of participants. If possible, enter this in the format 'mean (standard deviation)'. Other common reporting formats are a range, or the proportion of participants that fall within a particular age range.</p> <p>If not reported, enter 'not reported'</p> <p><i>Examples</i><br/> 45.3 (2.1) years<br/> 15-60 years<br/> 48% of participants were aged 30-44 years<br/> Over 13 years</p> |
| 4. Sex                        | Custom | Free text | <p>Enter a small amount of free text describing the sex of participants. If possible, enter this in the form 'number (percentage)'</p> <p>If not reported, enter 'not reported'</p> <p><i>Examples</i><br/> 100 (25%) female; 300 (75%) male<br/> 55% female<br/> Female only</p>                                                                                                                                                                   |
| 5. Urban/rural                | Custom | Free text | <p>Enter a small amount of free text describing the urban/rural status of participants</p> <p>If not reported, enter 'not reported'</p> <p><i>Examples</i><br/> Rural<br/> Urban<br/> Urban and peri-urban dwellers</p>                                                                                                                                                                                                                             |
| 6. Direction of relationships | Custom | Free text | <p>Enter a small amount of free text summarising the direction of the relationships found between exposures and outcomes. Try to keep this as succinct as possible, although it is likely that some studies will report a large number of relationships. Do not worry about reporting the size of the relationship.</p> <p><i>Examples</i><br/> Women travelled less than men<br/> Where new roads were built, car traffic increased</p>            |
| 7. Main idea                  | Custom | Free text | <p>Imagine you would like to summarise the article to a colleague in few sentences. What would you tell him/her?</p> <p>Try to get the main idea of the article. Limit your answer to 1 paragraph containing 3 to 5 sentences (maximum)</p>                                                                                                                                                                                                         |
| Baseline characteristics      |        |           |                                                                                                                                                                                                                                                                                                                                                                                                                                                     |
| Interventions                 |        |           | Do not enter data in this section                                                                                                                                                                                                                                                                                                                                                                                                                   |
| Outcomes                      |        |           | Do not enter data in this section                                                                                                                                                                                                                                                                                                                                                                                                                   |

## Categories of exposure

| Exposure category           | Examples                                                                                                                                                                                                                                                                                                                                                                                                                                                                                                                                                                                                                                                                                                                                                                                              |
|-----------------------------|-------------------------------------------------------------------------------------------------------------------------------------------------------------------------------------------------------------------------------------------------------------------------------------------------------------------------------------------------------------------------------------------------------------------------------------------------------------------------------------------------------------------------------------------------------------------------------------------------------------------------------------------------------------------------------------------------------------------------------------------------------------------------------------------------------|
| Individual characteristics  | <ul style="list-style-type: none"> <li>Age</li> <li>Sex</li> <li>Ethnicity</li> <li>Urban vs. rural dweller</li> <li>Slum dweller</li> <li>Country, region or area of residence</li> <li>Socioeconomic status</li> <li>Household factors (e.g. size, assets)</li> <li>Employment status</li> <li>Mobility budget (e.g. the share of income spent on public transport)</li> <li>Education level</li> <li>Occupation</li> <li>Income</li> <li>Marital status</li> <li>Vehicle ownership (e.g. car or motorbike)</li> <li>Bike ownership</li> <li>Hold driving license</li> <li>Ability to cycle</li> <li>Attitude towards particular travel modes</li> <li>Knowledge about travel modes</li> <li>Distance needed to travel (e.g. to place of work)</li> <li>Lifestyle</li> <li>Health status</li> </ul> |
| Travel mode characteristics | <ul style="list-style-type: none"> <li>Safety (e.g. road traffic accidents, injuries or fatalities)</li> <li>Crime (e.g. interpersonal violence, harassment, mugging)</li> <li>Cost</li> <li>Comfort</li> <li>Customer service</li> <li>Accessibility</li> <li>Availability of services</li> <li>Availability of space</li> <li>Speed (e.g. traffic jam, delays)</li> <li>Security</li> <li>Price stability</li> </ul>                                                                                                                                                                                                                                                                                                                                                                                |
| Built environment           | <ul style="list-style-type: none"> <li>Population density/urban sprawl</li> <li>Land use mix</li> <li>Street connectivity</li> <li>City layout (e.g. shops or other community destinations all clustered in city centre)</li> <li>Transport infrastructure (e.g. provision of paved roads, public transport, footpaths/cycling paths or infrastructure that protects vulnerable users)</li> <li>Sidewalk or street-crossing quality</li> <li>Cycle path quality</li> <li>Street lighting</li> <li>Speed management infrastructure</li> <li>General levels of traffic</li> <li>Green space</li> <li>Pollution or air quality</li> <li>Aesthetics (e.g. pleasantness of area)</li> <li>Incivilities (e.g. crime, litter, upkeep of area, traffic noise)</li> </ul>                                      |

|                             |                                                                                                                                                                                                                                                                                                                                                                                                                                                                                                                                                                                          |
|-----------------------------|------------------------------------------------------------------------------------------------------------------------------------------------------------------------------------------------------------------------------------------------------------------------------------------------------------------------------------------------------------------------------------------------------------------------------------------------------------------------------------------------------------------------------------------------------------------------------------------|
|                             | Note: This includes individuals' perceptions of the built environment as well as objective assessments of the built environment                                                                                                                                                                                                                                                                                                                                                                                                                                                          |
| Natural environment         | Climate (e.g. rainy vs. dry season, winter vs. summer)<br>Weather (e.g. hot temperatures)<br>Natural disasters<br><br>Note: This includes individuals' perceptions of the natural environment as well as objective assessments of the natural environment                                                                                                                                                                                                                                                                                                                                |
| Socio-cultural environment  | Social norms (e.g. family/household member roles, or community values)<br>Gender roles<br>Religious norms<br>Cultural norms<br>Class segregation<br>Stigmatisation/aspiration of particular travel modes (e.g. car seen as indicator of wealth)                                                                                                                                                                                                                                                                                                                                          |
| Policy or wider environment | Urban planning (e.g. planned vs. unplanned development)<br>Regional or national travel budgets or policies (including policy priorities)<br>Regional or national physical activity policies (including policy priorities)<br>Transport sector regulation/management, including taxes<br>Corruption/mismanagement<br>Economic development (e.g. leading to changing types of occupations)<br>Legacies (e.g. of apartheid or colonisation)<br>Climate/sustainability agenda (including oil crisis)<br>Overseas aid<br>Globalisation<br>International policy priorities<br>War and conflict |

**File S6. Modified CASP Cohort Study Checklist.**

| #                                              | Item                                                                                                  | Elaboration                                                                                                                                                                                                                                                                                                                                                                                                                                                                                                                           |
|------------------------------------------------|-------------------------------------------------------------------------------------------------------|---------------------------------------------------------------------------------------------------------------------------------------------------------------------------------------------------------------------------------------------------------------------------------------------------------------------------------------------------------------------------------------------------------------------------------------------------------------------------------------------------------------------------------------|
| Section A: Are the results of the study valid? |                                                                                                       |                                                                                                                                                                                                                                                                                                                                                                                                                                                                                                                                       |
| 1                                              | Did the study address a clearly focussed issue?<br><br>Yes<br><br>Can't tell<br><br>No                | HINT: A question can be 'focused' in terms of: <ul style="list-style-type: none"> <li>the population studied</li> <li>the risk factors studied</li> <li>is it clear whether the study tried to detect a beneficial or harmful effect the outcomes considered</li> </ul>                                                                                                                                                                                                                                                               |
| 2                                              | Was the cohort/sample recruited in an acceptable way?<br><br>Yes<br><br>Can't tell<br><br>No          | HINT: Look for selection bias which might compromise the generalisability of the findings: <ul style="list-style-type: none"> <li>was the cohort/sample representative of a defined population</li> <li>was there something special about the cohort/sample</li> <li>was everybody included who should have been</li> </ul>                                                                                                                                                                                                           |
| 3                                              | Was the exposure accurately measured to minimise bias?<br><br>Yes<br><br>Can't tell<br><br>No         | HINT: Look for measurement or classification bias: <ul style="list-style-type: none"> <li>did they use subjective or objective measurements</li> <li>do the measurements truly reflect what you want them to (have they been validated)</li> <li>were all the subjects classified into exposure groups using the same procedure</li> </ul>                                                                                                                                                                                            |
| 4                                              | Was the outcome accurately measured to minimise bias?<br><br>Yes<br><br>Can't tell<br><br>No          | HINT: Look for measurement or classification bias: <ul style="list-style-type: none"> <li>did they use subjective or objective measurements</li> <li>do the measurements truly reflect what you want them to (have they been validated)</li> <li>has a reliable system been established for detecting all the cases (for measuring disease occurrence)</li> <li>were the measurement methods similar in the different groups</li> <li>were the subjects and/or the outcome assessor blinded to exposure (does this matter)</li> </ul> |
| 5a                                             | Have the authors identified all important confounding factors?<br><br>Yes<br><br>Can't tell<br><br>No | HINT: list the ones you think might be important, and ones the author missed                                                                                                                                                                                                                                                                                                                                                                                                                                                          |

|                                  |                                                                                                                                                                 |                                                                                                                                                                                                                                                                                                                                                                                                                                |
|----------------------------------|-----------------------------------------------------------------------------------------------------------------------------------------------------------------|--------------------------------------------------------------------------------------------------------------------------------------------------------------------------------------------------------------------------------------------------------------------------------------------------------------------------------------------------------------------------------------------------------------------------------|
| 5b                               | <p>Have they taken account of the confounding factors in the design and/or analysis?</p> <p>Yes</p> <p>Can't tell</p> <p>No</p>                                 | <p>HINT: look for restriction in design, and techniques e.g. modelling, stratified-, regression-, or sensitivity analysis to correct, control or adjust for confounding factors</p>                                                                                                                                                                                                                                            |
| 6a                               | <p>For longitudinal studies: Was the follow up of subjects complete enough?</p> <p>Yes</p> <p>Can't tell</p> <p>No</p> <p>N/A (for cross-sectional studies)</p> | <p>HINT: Consider:</p> <ul style="list-style-type: none"> <li>the good or bad effects should have had long enough to reveal themselves</li> <li>the persons that are lost to follow-up may have different outcomes than those available for assessment</li> <li>in an open or dynamic cohort, was there anything special about the outcome of the people leaving, or the exposure of the people entering the cohort</li> </ul> |
| 6b                               | <p>For longitudinal studies: Was the follow up of subjects long enough?</p> <p>Yes</p> <p>Can't tell</p> <p>No</p> <p>N/A (for cross-sectional studies)</p>     | <p>HINT: Consider:</p> <ul style="list-style-type: none"> <li>the good or bad effects should have had long enough to reveal themselves</li> <li>the persons that are lost to follow-up may have different outcomes than those available for assessment</li> <li>in an open or dynamic cohort, was there anything special about the outcome of the people leaving, or the exposure of the people entering the cohort</li> </ul> |
| Section B: What are the results? |                                                                                                                                                                 |                                                                                                                                                                                                                                                                                                                                                                                                                                |
| 7                                | <p>What are the results of this study?</p> <p>[free text]</p>                                                                                                   | <p>HINT: Consider:</p> <ul style="list-style-type: none"> <li>what are the bottom line results</li> <li>have they reported the rate or the proportion between the exposed/unexposed, the ratio/rate difference</li> <li>how strong is the association between exposure and outcome (RR)</li> <li>what is the absolute risk reduction (ARR)</li> </ul>                                                                          |
| 8                                | <p>How precise are the results?</p> <p>[free text]</p>                                                                                                          | <p>HINT: look for the range of the confidence intervals, if given</p>                                                                                                                                                                                                                                                                                                                                                          |
| 9                                | <p>Do you believe the results?</p> <p>Yes</p> <p>Can't tell</p>                                                                                                 | <p>HINT: Consider:</p> <ul style="list-style-type: none"> <li>big effect is hard to ignore</li> <li>can it be due to bias, chance or confounding</li> <li>are the design and methods of this study sufficiently flawed to make the results unreliable</li> </ul>                                                                                                                                                               |



|                                           |                                                                                                               |                                                                                                                                                                                                                                                                                                                                                                                                                          |
|-------------------------------------------|---------------------------------------------------------------------------------------------------------------|--------------------------------------------------------------------------------------------------------------------------------------------------------------------------------------------------------------------------------------------------------------------------------------------------------------------------------------------------------------------------------------------------------------------------|
|                                           | No                                                                                                            | <ul style="list-style-type: none"> <li>Bradford Hills criteria (e.g. time sequence, dose-response gradient, biological plausibility, consistency)</li> </ul>                                                                                                                                                                                                                                                             |
| Section C: Will the results help locally? |                                                                                                               |                                                                                                                                                                                                                                                                                                                                                                                                                          |
| 10                                        | <p>Can the results be applied to the local population?</p> <p>Yes</p> <p>Can't tell</p> <p>No</p>             | <p>HINT: Consider whether:</p> <ul style="list-style-type: none"> <li>a cohort/cross-sectional study was the appropriate method to answer this question</li> <li>the subjects covered in this study could be sufficiently different from your population to cause concern</li> <li>your local setting is likely to differ much from that of the study</li> <li>you can quantify the local benefits and harms</li> </ul>  |
| 11                                        | <p>Do the results of this study fit with other available evidence?</p> <p>Yes</p> <p>Can't tell</p> <p>No</p> |                                                                                                                                                                                                                                                                                                                                                                                                                          |
| 12                                        | <p>What are the implications of this study for practice?</p> <p>Yes</p> <p>Can't tell</p> <p>No</p>           | <p>HINT: Consider:</p> <ul style="list-style-type: none"> <li>one observational study rarely provides sufficiently robust evidence to recommend changes to clinical practice or within health policy decision making</li> <li>for certain questions, observational studies provide the only evidence</li> <li>recommendations from observational studies are always stronger when supported by other evidence</li> </ul> |

**File S7. Modified CASP Qualitative Checklist.**

| #                                              | Item                                                                                                            | Elaboration                                                                                                                                                                                                                                                                                                                                                                                                                                                                                                                                                                     |
|------------------------------------------------|-----------------------------------------------------------------------------------------------------------------|---------------------------------------------------------------------------------------------------------------------------------------------------------------------------------------------------------------------------------------------------------------------------------------------------------------------------------------------------------------------------------------------------------------------------------------------------------------------------------------------------------------------------------------------------------------------------------|
| Section A: Are the results of the study valid? |                                                                                                                 |                                                                                                                                                                                                                                                                                                                                                                                                                                                                                                                                                                                 |
| 1                                              | Was there a clear statement of the aims of the research?<br><br>Yes<br><br>Can't tell<br><br>No                 | HINT: Consider: <ul style="list-style-type: none"> <li>• what was the goal of the research</li> <li>• why it was thought important</li> <li>• its relevance</li> </ul>                                                                                                                                                                                                                                                                                                                                                                                                          |
| 2                                              | Is a qualitative methodology appropriate?<br><br>Yes<br><br>Can't tell<br><br>No                                | HINT: Consider: <ul style="list-style-type: none"> <li>• If the research seeks to interpret or illuminate the actions and/or subjective experiences of research participants</li> <li>• Is qualitative research the right methodology for addressing the research goal</li> </ul>                                                                                                                                                                                                                                                                                               |
| 3                                              | Was the research design appropriate to address the aims of the research?<br><br>Yes<br><br>Can't tell<br><br>No | HINT: Consider: <ul style="list-style-type: none"> <li>• if the researcher has justified the research design (e.g. have they discussed how they decided which method to use)</li> </ul>                                                                                                                                                                                                                                                                                                                                                                                         |
| 4                                              | Was the recruitment strategy appropriate to the aims of the research?<br><br>Yes<br><br>Can't tell<br><br>No    | HINT: Consider: <ul style="list-style-type: none"> <li>• If the researcher has explained how the participants were selected:</li> <li>• If they explained why the participants they selected were the most appropriate to provide access to the type of knowledge sought by the study</li> <li>• If there are any discussions around recruitment (e.g. why some people chose not to take part)</li> </ul>                                                                                                                                                                       |
| 5                                              | Was the data collected in a way that addressed the research issue?<br><br>Yes<br><br>Can't tell<br><br>No       | HINT: Consider: <ul style="list-style-type: none"> <li>• If the setting for the data collection was justified</li> <li>• If it is clear how data were collected (e.g. focus group, semi-structured interview etc.)</li> <li>• If the researcher has justified the methods chosen</li> <li>• If the researcher has made the methods explicit (e.g. for interview method, is there an indication of how interviews are conducted, or did they use a topic guide)</li> <li>• If methods were modified during the study. If so, has the researcher explained how and why</li> </ul> |

|                                  |                                                                                                                                    |                                                                                                                                                                                                                                                                                                                                                                                                                                                                                                                                                                                                                                                                                                        |
|----------------------------------|------------------------------------------------------------------------------------------------------------------------------------|--------------------------------------------------------------------------------------------------------------------------------------------------------------------------------------------------------------------------------------------------------------------------------------------------------------------------------------------------------------------------------------------------------------------------------------------------------------------------------------------------------------------------------------------------------------------------------------------------------------------------------------------------------------------------------------------------------|
|                                  |                                                                                                                                    | <ul style="list-style-type: none"> <li>• If the form of data is clear (e.g. tape recordings, video material, notes etc.)</li> <li>• If the researcher has discussed saturation of data</li> </ul>                                                                                                                                                                                                                                                                                                                                                                                                                                                                                                      |
| 6                                | <p>Has the relationship between researcher and participants been adequately considered?</p> <p>Yes</p> <p>Can't tell</p> <p>No</p> | <p>HINT: Consider:</p> <ul style="list-style-type: none"> <li>• If the researcher critically examined their own role, potential bias and influence during (a) formulation of the research questions (b) data collection, including sample recruitment and choice of location</li> <li>• How the researcher responded to events during the study and whether they considered the implications of any changes in the research design</li> </ul>                                                                                                                                                                                                                                                          |
| Section B: What are the results? |                                                                                                                                    |                                                                                                                                                                                                                                                                                                                                                                                                                                                                                                                                                                                                                                                                                                        |
| 7                                | <p>Have ethical issues been taken into consideration?</p> <p>Yes</p> <p>Can't tell</p> <p>No</p>                                   | <p>HINT: Consider:</p> <ul style="list-style-type: none"> <li>• If there are sufficient details of how the research was explained to participants for the reader to assess whether ethical standards were maintained</li> <li>• If the researcher has discussed issues raised by the study (e.g. issues around informed consent or confidentiality or how they have handled the effects of the study on the participants during and after the study)</li> <li>• If approval has been sought from the ethics committee</li> </ul>                                                                                                                                                                       |
| 8                                | <p>Was the data analysis sufficiently rigorous?</p> <p>Yes</p> <p>Can't tell</p> <p>No</p>                                         | <p>HINT: Consider:</p> <ul style="list-style-type: none"> <li>• If there is an in-depth description of the analysis process</li> <li>• If thematic analysis is used. If so, is it clear how the categories/themes were derived from the data</li> <li>• Whether the researcher explains how the data presented were selected from the original sample to demonstrate the analysis process</li> <li>• If sufficient data are presented to support the findings</li> <li>• To what extent contradictory data are taken into account</li> <li>• Whether the researcher critically examined their own role, potential bias and influence during analysis and selection of data for presentation</li> </ul> |
| 9                                | <p>Is there a clear statement of findings?</p> <p>Yes</p> <p>Can't tell</p>                                                        | <p>HINT: Consider whether:</p> <ul style="list-style-type: none"> <li>• If the findings are explicit</li> <li>• If there is adequate discussion of the evidence both for and against the researcher's arguments</li> </ul>                                                                                                                                                                                                                                                                                                                                                                                                                                                                             |

|                                           |                                                         |                                                                                                                                                                                                                                                                                                                                                                                                                                                                                                                                           |
|-------------------------------------------|---------------------------------------------------------|-------------------------------------------------------------------------------------------------------------------------------------------------------------------------------------------------------------------------------------------------------------------------------------------------------------------------------------------------------------------------------------------------------------------------------------------------------------------------------------------------------------------------------------------|
|                                           | No                                                      | <ul style="list-style-type: none"> <li>• If the researcher has discussed the credibility of their findings (e.g. triangulation, respondent validation, more than one analyst)</li> <li>• If the findings are discussed in relation to the original research question</li> </ul>                                                                                                                                                                                                                                                           |
| Section C: Will the results help locally? |                                                         |                                                                                                                                                                                                                                                                                                                                                                                                                                                                                                                                           |
| 10                                        | <p>How valuable is the research?</p> <p>[free text]</p> | <p>HINT: Consider:</p> <ul style="list-style-type: none"> <li>• If the researcher discusses the contribution the study makes to existing knowledge or understanding (e.g. do they consider the findings in relation to current practice or policy, or relevant research based literature)</li> <li>• If they identify new areas where research is necessary</li> <li>• If the researchers have discussed whether or how the findings can be transferred to other populations or considered other ways the research may be used</li> </ul> |

**File S8. Keywords and country domains for grey literature searches.**

Keywords: travel behaviour, active transport, physical activity

Country domains: google.cm (Cameroon), google.com.jm (Jamaica), google.co.ke (Kenya), google.co.za (South Africa)

| Cameroon:                                                      |                | google.cm |                                                                                                                                                                                   |  |
|----------------------------------------------------------------|----------------|-----------|-----------------------------------------------------------------------------------------------------------------------------------------------------------------------------------|--|
| Search in Google                                               | Date of access | URL link  | Title                                                                                                                                                                             |  |
| travel behaviour active transport physical activity "cameroon" | 26/07/2019     | 1         | Children's Active Transportation (Pg 176)                                                                                                                                         |  |
| travel behaviour active transport physical activity "cameroon" | 26/07/2019     | 2         | Rural Transport Health and Safety in Sub-Saharan Africa                                                                                                                           |  |
| travel behaviour active transport physical activity "cameroon" | 26/07/2019     | 3         | A cross-sectional study of physical activity and sedentary behaviours in a Caribbean population: combining objective and questionnaire data to guide future interventions (Pg 12) |  |
| travel behaviour active transport physical activity "cameroon" | 26/07/2019     | 4         | Potential Health Implications and Health Cost Reductions of Transit-Induced Physical Activity (Pg 4)                                                                              |  |
| travel behaviour active transport physical activity "cameroon" | 26/07/2019     | 5         | Research on Women's Issues in Transportation (pg 6)                                                                                                                               |  |
| travel behaviour active transport physical activity "cameroon" | 26/07/2019     | 6         | Cameroon                                                                                                                                                                          |  |
| travel behaviour active transport physical activity "cameroon" | 26/07/2019     | 7         | Overweight and obesity in children aged 3–13 years in urban Cameroon: a cross- sectional study of prevalence and association with socio-economic status                           |  |
| travel behaviour active transport physical activity "cameroon" | 26/07/2019     | 8         | Multinational Cemar-Cameroon-Central African Republic-Chad. Transport Facilitation Programme On The Douala – Bangui And Douala – N'djamena Corridors                              |  |
| travel behaviour active transport physical activity "cameroon" | 05/08/2019     | A         | Motorbike taxis in the "transport crisis" of West and Central African cities                                                                                                      |  |
|                                                                |                | B         | Physical Activity and Associated Socioeconomic Determinants in Rural and Urban Tanzania: Results from the 2012 WHO-STEPS Survey                                                   |  |
|                                                                |                | C         | Chapter 1: Physical inactivity                                                                                                                                                    |  |
|                                                                |                | D         | A grounded theory of how social support influences physical activity in adolescent girls                                                                                          |  |
|                                                                |                | E         | Environmental determinants of lifestyle behaviours and chronic disease risk                                                                                                       |  |
|                                                                |                | F         | Road infrastructure and border trade in North-East Geopolitical. Zone in Nigeria                                                                                                  |  |
|                                                                |                | G         | Body weight and physical activity of adults in rural Uganda                                                                                                                       |  |
|                                                                |                | H         | Children and Youth and Sustainable Urban Mobility                                                                                                                                 |  |
|                                                                |                | I         | Integrating Big Data into a Sustainable Mobility Policy 2.0 Planning Support System                                                                                               |  |

| Jamaica:                                                       |                | google.com.jm |                                                                                                                                                                           |
|----------------------------------------------------------------|----------------|---------------|---------------------------------------------------------------------------------------------------------------------------------------------------------------------------|
| Search in Google                                               | Date of access | URL link      | Title                                                                                                                                                                     |
| travel behaviour active transport physical activity "jamaica"  | 26/07/2019     | 9             | Comparisons of intensity-duration patterns of physical activity in the US, Jamaica and 3 African countries                                                                |
| travel behaviour active transport physical activity "jamaica " | 26/07/2019     | 10            | Government of Jamaica – National Transport Policy, October 2007                                                                                                           |
| travel behaviour active transport physical activity "jamaica " | 26/07/2019     | 11            | Jamaica Health and Lifestyle Survey 2007-8 TECHNICAL REPORT                                                                                                               |
| travel behaviour active transport physical activity "jamaica " | 26/07/2019     | 12            | Association of car ownership and physical activity across the spectrum of human development: Modeling the Epidemiologic Transition Study (METS)                           |
| travel behaviour active transport physical activity "jamaica " | 26/07/2019     | 13            | A National Transport Strategy Framework For Jamaica: Implications For Financing The Sector                                                                                |
| travel behaviour active transport physical activity "jamaica " | 26/07/2019     | 14            | Jamaica 2019 Crime & Safety Report (Transportation-Safety situation)                                                                                                      |
| travel behaviour active transport physical activity "jamaica " | 05/08/2019     | J             | A cross-sectional study of physical activity and sedentary behaviours in a Caribbean population: combining objective and questionnaire data to guide future interventions |
|                                                                |                | K             | Bicycling for Transportation                                                                                                                                              |

| Kenya:                                                       |                | google.co.ke |                                                                                                                                             |
|--------------------------------------------------------------|----------------|--------------|---------------------------------------------------------------------------------------------------------------------------------------------|
| Search in Google                                             | Date of access | URL link     | Title                                                                                                                                       |
| travel behaviour active transport physical activity "kenya"  | 26/07/2019     | 15           | Active school transport and weekday physical activity in 9–11-year-old children from 12 countries                                           |
| travel behaviour active transport physical activity "kenya " | 26/07/2019     | 16           | A systematic review of active transportation research in Africa and the psychometric properties of measurement tools for children and youth |
| travel behaviour active transport physical activity "kenya " | 26/07/2019     | 17           | Kenya's 2016 Report Card on the Physical Activity and Body Weight of Children and Youth                                                     |
| travel behaviour active transport physical activity "kenya " | 26/07/2019     | 18           | Assessment of Physical Activity and Active Transport Among School Children in Kenya, Nigeria, and Mozambique                                |
| travel behaviour active transport physical activity "kenya " | 26/07/2019     | 19           | Emerging Evidence of the Physical Activity Transition in Kenya                                                                              |

|                                                              |            |    |                                                                                                                                                                |
|--------------------------------------------------------------|------------|----|----------------------------------------------------------------------------------------------------------------------------------------------------------------|
| travel behaviour active transport physical activity "kenya " | 26/07/2019 | 20 | Development and convergent validity of new self-administered questionnaires of active transportation in three African countries: Kenya, Mozambique and Nigeria |
| travel behaviour active transport physical activity "kenya " | 26/07/2019 | 21 | Associations Between Parental Perceptions of the Neighborhood Environment and Childhood Physical Activity: Results from ISCOLE-Kenya                           |
| travel behaviour active transport physical activity "kenya " | 26/07/2019 | 22 | Rural Transport Health and Safety in Sub-Saharan Africa                                                                                                        |
| travel behaviour active transport physical activity "kenya " | 05/08/2019 | L  | Active transport in Africa and beyond: towards a strategic framework                                                                                           |
|                                                              |            | M  | Physical activity temporal trends among children and adolescents                                                                                               |
|                                                              |            | N  | Active mobility and health: Insights from the PASTA project                                                                                                    |
|                                                              |            | O  | Life-Oriented Behavioral Research for Urban Policy                                                                                                             |
|                                                              |            | P  | Geographies of Transport and Ageing                                                                                                                            |

| South Africa: google.co.za                                          |                |          |                                                                                                                                                |
|---------------------------------------------------------------------|----------------|----------|------------------------------------------------------------------------------------------------------------------------------------------------|
| Search in Google                                                    | Date of access | URL link | Title                                                                                                                                          |
| travel behaviour active transport physical activity "south africa"  | 26/07/2019     | 23       | Active transport in Africa and beyond: towards a strategic framework                                                                           |
| travel behaviour active transport physical activity " south africa" | 26/07/2019     | 24       | A systematic review of active transportation research in Africa and the psychometric properties of measurement tools for children and youth    |
| travel behaviour active transport physical activity " south africa" | 26/07/2019     | 25       | Transport Geography in South Africa                                                                                                            |
| travel behaviour active transport physical activity " south africa" | 26/07/2019     | 26       | Active school transport and weekday physical activity in 9–11-year-old children from 12 countries                                              |
| travel behaviour active transport physical activity " south africa" | 26/07/2019     | 27       | Making the connections between transport disadvantage and the social exclusion of low income populations in the Tshwane Region of South Africa |
| travel behaviour active transport physical activity " south africa" | 26/07/2019     | 28       | The Impact of Crime and Neighbourhood Enclosures on Travel Behaviour and Transport Patterns in South Africa                                    |
| travel behaviour active transport physical activity " south africa" | 26/07/2019     | 29       | Are the correlates of active school transport context-specific?                                                                                |

|                                                                     |           |   |                                                                                                                                                                             |
|---------------------------------------------------------------------|-----------|---|-----------------------------------------------------------------------------------------------------------------------------------------------------------------------------|
| travel behaviour active transport physical activity " south africa" | 05/8/2019 | Q | Sustainable Urban Transport in the Developing World: Beyond Megacities                                                                                                      |
|                                                                     |           | R | Children's Independent Mobility: Current Knowledge, Future Directions, and Public Health Implications                                                                       |
|                                                                     |           | S | Associations between active travel and physical multi-morbidity in six low- and middle-income countries among community-dwelling older adults: A cross-sectional study      |
|                                                                     |           | T | Towards Sustainable Urban Transportation in Ghana: Exploring Adults' Intention to Adopt Cycling to Work Using Theory of Planned Behaviour and Structural Equation Modelling |

| Cameroun:                                                        |                | google.cm |                                                                                                                          |
|------------------------------------------------------------------|----------------|-----------|--------------------------------------------------------------------------------------------------------------------------|
| Search in Google                                                 | Date of access | URL link  | Title                                                                                                                    |
| travel behaviour active transport physical activity "cameroun"   | 26/07/2019     | 30        | Poverty and Urban motility in Doula                                                                                      |
| travel behaviour active transport physical activity " cameroun " | 26/07/2019     | 31        | Motorized Two-Wheelers In Sub-Saharan African Cities: Public And Private Use                                             |
| travel behaviour active transport physical activity " cameroun " | 26/07/2019     | 32        | Addressing urban sprawl in Douala, Cameroon: Lessons from Xiamen integrated coastal management                           |
| travel behaviour active transport physical activity " cameroun " | 05/8/2019      | U         | TRANSPORT SERVICES AND THEIR IMPACT ON POVERTY AND GROWTH IN RURAL SUB-SAHARAN AFRICA                                    |
|                                                                  |                | V         | TRANSPORTATION CONDITIONS AND ACCESS TO SERVICES IN A CONTEXT OF URBAN SPRAWL AND DEREGULATION THE CASE OF DAR ES SALAAM |
|                                                                  |                | W         | Transport for Sustainable Development                                                                                    |
|                                                                  |                | X         | INTRODUCING SUSTAINABLE URBAN TRANSPORT. A case of Kampala, Uganda                                                       |
|                                                                  |                | Y         | Low carbon stations for low carbon cities                                                                                |



**File S9. Characteristics of included studies.**

| Author (year)              | Region                           | Country (setting)                                                | Theory              | Quantitative methods | Qualitative methods                                                                                       | Outcomes                      | Sample characteristics                                                                                                                  | Funding                                                                                          | Authorship                                              |
|----------------------------|----------------------------------|------------------------------------------------------------------|---------------------|----------------------|-----------------------------------------------------------------------------------------------------------|-------------------------------|-----------------------------------------------------------------------------------------------------------------------------------------|--------------------------------------------------------------------------------------------------|---------------------------------------------------------|
| <b>Qualitative studies</b> |                                  |                                                                  |                     |                      |                                                                                                           |                               |                                                                                                                                         |                                                                                                  |                                                         |
| Gough (2008)               | Eastern Africa                   | Zambia (Lusaka)                                                  | Mobilities paradigm |                      | Focus groups<br>In-depth interviews                                                                       | Mobility and travel behaviour | Sample size: n=60 individuals<br>Area: urban<br>Sex: males and females<br>Age: adolescents and younger adults                           | Council for Development Research of the Danish International Development Agency                  | First author: Denmark<br><br>Single author study        |
| Benwell (2009)             | Southern Africa                  | South Africa (Cape Peninsula)                                    | Mobilities paradigm |                      | Focus groups<br>Art-based methods (drawing, painting, photography, drama)<br>Mapping<br>Accompanied walks | Mobility and travel behaviour | Sample size: n=65 individuals<br>Area: urban<br>Sex: 40% males, 60% females<br>Age: [38,39,48-50,53,58,70,74-76,95,100,113,114,132,133] | United Kingdom Economic and Social Research Council                                              | First author: United Kingdom<br><br>Single author study |
| Kamuhanda (2009)           | Eastern Africa                   | Uganda (Kampala)                                                 | None specified      |                      | Structured interviews                                                                                     | Paratransit                   | Sample size: n=161 individuals<br>Area: urban<br>Sex: males and females<br>Age: adults                                                  | International Labour Organisation<br><br>United Kingdom Department for International Development | First author: Uganda<br><br>Last author: India          |
| Langevang (2009)           | Western Africa                   | Ghana (Madina)                                                   | Mobilities paradigm |                      | Focus groups<br>Life histories<br>Photo-elicitation<br>Accompanied walks                                  | Mobility and travel behaviour | Sample size: n=17 focus groups<br>Area: urban<br>Sex: males and females<br>Age: adolescents and younger adults                          | Council for Development Research of the Danish International Development Agency                  | First author: Denmark<br><br>Last author: Denmark       |
| Porter (2010)              | Eastern Africa<br>Western Africa | Ghana (Abura)<br>Malawi (Ndirande)<br>South Africa (Ngangalizwe) | Mobilities paradigm |                      | In-depth interviews<br>Focus groups<br>Life histories<br>Accompanied walks                                | Mobility and travel behaviour | Sample size: not reported<br>Area: urban<br>Sex: males and females<br>Age: children and adolescents                                     | United Kingdom Department for International Development                                          | First author: United Kingdom                            |

|                       |                                        |                                                        |                       |  |                                                                            |                     |                                                                                                              |                                                                                                                                                                                                                |                                                                        |
|-----------------------|----------------------------------------|--------------------------------------------------------|-----------------------|--|----------------------------------------------------------------------------|---------------------|--------------------------------------------------------------------------------------------------------------|----------------------------------------------------------------------------------------------------------------------------------------------------------------------------------------------------------------|------------------------------------------------------------------------|
|                       | Southern Africa                        |                                                        |                       |  |                                                                            |                     |                                                                                                              | United Kingdom<br>Economic and<br>Social Research<br>Council                                                                                                                                                   | Last author:<br>Ghana                                                  |
| Porter (2010)         | Southern Africa                        | South Africa<br>(OR Tambo<br>District<br>Municipality) | None<br>specified     |  | In-depth interviews<br>Focus groups<br>Life histories<br>Accompanied walks | Travel<br>behaviour | Sample size: not reported<br>Area: rural<br>Sex: males and females<br>Age: children and<br>adolescents       | No funding<br>reported                                                                                                                                                                                         | First author:<br>United<br>Kingdom<br><br>Last author:<br>South Africa |
| Lucas (2011)          | Southern Africa                        | South Africa<br>(Tshwane<br>Metropolitan<br>Region)    | Social<br>exclusion   |  | Focus groups                                                               | Travel<br>behaviour | Sample size: n=102<br>individuals<br>Area: urban<br>Sex: males and females<br>Age: adolescents and<br>adults | South Africa<br>Department of<br>Transport                                                                                                                                                                     | First author:<br>United<br>Kingdom<br><br>Single author<br>study       |
| Porter (2011)         | Eastern<br>Africa<br>Western<br>Africa | Ghana<br>Malawi<br>Nigeria                             | Gendered<br>discourse |  | In-depth interviews                                                        | Travel<br>behaviour | Sample size: not reported<br>Area: rural<br>Sex: 100% female<br>Age: children and adults                     | United Kingdom<br>Department for<br>International<br>Development<br><br>United Kingdom<br>Economic and<br>Social Research<br>Council                                                                           | First author:<br>United<br>Kingdom<br><br>Single author<br>study       |
| Archambault<br>(2012) | Eastern<br>Africa                      | Mozambique<br>(Inhambane)                              | None<br>specified     |  | Group discussions<br>Individual<br>conversations                           | Travel<br>behaviour | Sample size: not reported<br>Area: urban<br>Sex: 100% male<br>Age: younger adults                            | Social Sciences<br>and Humanities<br>Research Council<br>of Canada<br><br>United Kingdom<br>Overseas<br>Research Student<br>Scheme<br><br>Central Research<br>Fund, University<br>of London, United<br>Kingdom | First author:<br>United<br>Kingdom<br><br>Single author<br>study       |

|                    |                 |                                         |                             |  |                                                                                |                               |                                                                                                                                      |                                                                                                       |                                                                 |
|--------------------|-----------------|-----------------------------------------|-----------------------------|--|--------------------------------------------------------------------------------|-------------------------------|--------------------------------------------------------------------------------------------------------------------------------------|-------------------------------------------------------------------------------------------------------|-----------------------------------------------------------------|
| Turner (2012)      | Eastern Africa  | Mozambique (Nampula)<br>Rwanda (Kigali) | None specified              |  | Group (household) discussions                                                  | Travel behaviour              | Sample size: not reported<br>Area: urban<br>Sex: not reported<br>Age: not reported                                                   | No funding reported                                                                                   | First author: United Kingdom<br><br>Last author: United Kingdom |
| van Blerk (2013)   | Southern Africa | South Africa (Cape Town, Cape Flats)    | Mobilities paradigm         |  | Unstructured interviews<br>Focus groups<br>Participatory mapping               | Mobility and travel behaviour | Sample size: n=50 individuals<br>Area: urban<br>Sex: mostly male<br>Age: children, adolescents and younger adults                    | United Kingdom Economic and Social Research Council                                                   | First author: United Kingdom<br><br>Single author study         |
| Raynor (2014)      | Eastern Africa  | Uganda (Kampala)                        | None specified              |  | Focus groups<br>In-depth interviews                                            | Paratransit                   | Sample size: not reported<br>Area: urban<br>Sex: not reported<br>Age: not reported                                                   | No funding reported                                                                                   | First author: Uganda<br><br>Single author study                 |
| Alando (2016)      | Eastern Africa  | Kenya (Kisumu)                          | None specified              |  | Semi-structured interviews<br>Field notes<br>Policy analysis                   | Cycling                       | Sample size: 2 individuals<br>Area: urban<br>Sex: not reported<br>Age: adults                                                        | German Academic Exchange Program<br><br>Kenya National Council for Science, Technology and Innovation | First author: Germany<br><br>Last author: Germany               |
| El-Dorghamy (2016) | Northern Africa | Egypt (Ezbet El-Haggana)                | Theory of planned behaviour |  | Focus groups<br>Semi-structured interviews<br>Field notes<br>Photo-elicitation | Travel behaviour              | Sample size: n=10 focus groups each comprising 4-11 individuals<br>Area: urban<br>Sex: males and females<br>Age: children and adults | No funding reported                                                                                   | First author: Germany<br><br>Last author: United Arab Emirates  |
| Esson (2016)       | Western Africa  | Ghana (Accra)                           | Mobilities paradigm         |  | Focus groups<br>Semi-structured interviews                                     | Mobility and travel behaviour | Sample size: n=118 individuals, n=14 focus groups<br>Area: urban                                                                     | RurbanAfrica funded by the European Union                                                             | First author: United Kingdom                                    |

|                        |                |                                        |                                 |  |                                            |                               |                                                                                                                           |                                                                                                                                                |                                                                       |
|------------------------|----------------|----------------------------------------|---------------------------------|--|--------------------------------------------|-------------------------------|---------------------------------------------------------------------------------------------------------------------------|------------------------------------------------------------------------------------------------------------------------------------------------|-----------------------------------------------------------------------|
|                        |                |                                        |                                 |  |                                            |                               | Sex: males and females<br>Age: adolescents and adults                                                                     |                                                                                                                                                | Last author:<br>Ghana                                                 |
| Ortegon-Sanchez (2016) | Caribbean      | Panama (Panama City Metropolitan Area) | None specified                  |  | Stakeholders' interviews                   | Bus Rapid Transit use         | Sample size: n=9<br>Organizations involved in the mobility from different sectors and government levels                   | The British Embassy-Prosperity fund programme                                                                                                  | First author:<br>United Kingdom<br><br>Last author:<br>United Kingdom |
| Zolnikov (2016)        | Eastern Africa | Kenya (Narok)                          | None specified                  |  | Accompanied walks                          | Walking to collect water      | Sample size: not reported<br>Area: rural<br>Sex: 100% female<br>Age: adults                                               | No funding reported                                                                                                                            | First author:<br>United States of America<br><br>Single author study  |
| Kenea (2017)           | Eastern Africa | Ethiopia (Addis Ababa)                 | None specified                  |  | In-depth interviews                        | Use of travel modes           | Sample size: n=12 stakeholders from transport sector<br>Area: urban<br>Sex: 83% males, 17% females                        | No funding reported                                                                                                                            | First author:<br>Australia<br><br>Last author:<br>Australia           |
| Yankson (2017)         | Western Africa | Ghana (Sekondi-Takoradi)               | Kaufmann's typology of mobility |  | Focus groups<br>Semi-structured interviews | Travel behaviour              | Sample size: n=108 individuals, n=20 focus groups<br>Area: urban<br>Sex: males and females<br>Age: adolescents and adults | RurbanAfrica funded by the European Union                                                                                                      | First author:<br>Ghana<br><br>Last author:<br>Ghana                   |
| Gwaka (2018)           | Eastern Africa | Zimbabwe (Beitbridge district)         | Mobilities paradigm             |  | Focus groups<br>Individual conversations   | Mobility and travel behaviour | Sample size: 3 focus groups<br>Area: rural<br>Sex: males and females<br>Age: adolescents and younger adults               | Makerere University School of Public Health's Resilient Africa Network<br><br>University of Pretoria Southern Africa Resilience Innovation Lab | First author:<br>South Africa<br><br>Single author study              |

|                                      |                                   |                                                                       |                                        |                                          |                                           |                                                                       |                                                                                                                                         |                                                                                                                                       |                                                             |
|--------------------------------------|-----------------------------------|-----------------------------------------------------------------------|----------------------------------------|------------------------------------------|-------------------------------------------|-----------------------------------------------------------------------|-----------------------------------------------------------------------------------------------------------------------------------------|---------------------------------------------------------------------------------------------------------------------------------------|-------------------------------------------------------------|
|                                      |                                   |                                                                       |                                        |                                          |                                           |                                                                       |                                                                                                                                         | United States Agency for International Development                                                                                    |                                                             |
| Lesteven (2018)                      | Eastern Africa<br>Southern Africa | Ethiopia (Addis Ababa)<br>Kenya (Nairobi)<br>South Africa (Cape Town) | None specified                         |                                          | Semi-structured interviews<br>Field notes | Paratransit and public transport                                      | Sample size: n=32 individuals<br>Area: urban<br>Sex: not reported<br>Age: not reported                                                  | Sustainable Mobility Institute<br>Renault-ParisTech, as part of the NexMob research project undertaken by City Mobility Transport Lab | First author: France<br><br>Last author: France             |
| Poku-Boansi (2018)                   | Western Africa                    | Ghana (Kumasi)                                                        | None specified                         |                                          | Semi-structured interviews                | Travel behaviour                                                      | Sample size: n=200 individuals<br>Area: urban<br>Sex: 48% males, 52% females<br>Age: adults                                             | No funding reported                                                                                                                   | First author: Ghana<br><br>Last author: Ghana               |
| <b>Mixed-method studies</b>          |                                   |                                                                       |                                        |                                          |                                           |                                                                       |                                                                                                                                         |                                                                                                                                       |                                                             |
| Behrens (2010)                       | Southern Africa                   | South Africa (Cape Town)                                              | Behavioural change transactional model | Cross-sectional survey                   | Semi-structured interviews                | Travel behaviour                                                      | Sample size: n=40 individuals<br>Area: urban<br>Sex: not reported<br>Age: not reported                                                  | No funding reported                                                                                                                   | First author: South Africa<br><br>Last author: South Africa |
| Diaz Olvera (2010)                   | Central Africa<br>Western Africa  | Cameroon (Douala)<br>Niger (Niamey)                                   | None specified                         | Cross-sectional survey                   | In-depth interviews                       | Use of travel modes                                                   | Sample size: not reported<br>Area: urban<br>Sex: not reported<br>Age: not reported                                                      | No funding reported                                                                                                                   | First author: France<br><br>Last author: Cameroon           |
| Integrated Transport Planning (2010) | Eastern Africa                    | Uganda (Greater Kampala Metropolitan Area)                            | None specified                         | Cross-sectional survey<br>Traffic counts | Semi-structured interviews                | Travel time<br>Travel distance<br>Travel speed<br>Use of travel modes | Sample size: n=126,895 inbound traffic counts; 127,197 outbound traffic counts<br>Area: urban<br>Sex: not reported<br>Age: not reported | No funding reported                                                                                                                   | First author: United Kingdom<br><br>Single author study     |

|                     |                                                    |                                                          |                                        |                        |                                                                            |                                                          |                                                                                                                                                               |                                                                                                       |                                                                   |
|---------------------|----------------------------------------------------|----------------------------------------------------------|----------------------------------------|------------------------|----------------------------------------------------------------------------|----------------------------------------------------------|---------------------------------------------------------------------------------------------------------------------------------------------------------------|-------------------------------------------------------------------------------------------------------|-------------------------------------------------------------------|
| Nkurunziza (2010)   | Eastern Africa                                     | Tanzania (Dar es Salaam)                                 | Behavioural change transactional model | Cross-sectional survey | Interview                                                                  | Travel distance<br>Use of travel modes<br>Travel purpose | Sample size: n=598 individuals<br>Area: urban<br>Sex: 75% males, 25% females<br>Age: children and adults                                                      | The Netherlands<br>Cycling Academic Network and Interface for Cycling Expertise                       | First author: The Netherlands<br><br>Last author: The Netherlands |
| Abane (2011)        | Western Africa                                     | Ghana (Accra, Kumasi, Tamale and Sekondi-Takoradi)       | None specified                         | Cross-sectional survey | In-depth interviews<br>Field notes                                         | Paratransit and public transport                         | Sample size: n=926 individuals, n=21 transport officials<br>Area: urban<br>Sex: 51% males, 48% females<br>Age: adolescents and adults                         | No funding reported                                                                                   | First author: Ghana<br><br>Single author study                    |
| Amoako-Sakyi (2011) | Western Africa                                     | Ghana (urban, peri-urban and rural communities)          | None specified                         | Cross-sectional survey | Focus groups<br>In-depth interviews                                        | Cycling                                                  | Sample size: n=1005 individuals, n=323 interviews, n=31 focus groups<br>Area: urban and rural<br>Sex: 47% males, 53% females<br>Age: children and adolescents | No funding reported                                                                                   | First author: Ghana<br><br>Last author: Ghana                     |
| Kumar (2011)        | Central Africa<br>Eastern Africa<br>Western Africa | Cameroon (Douala)<br>Nigeria (Lagos)<br>Uganda (Kampala) | Political economy perspective          | Cross-sectional survey | Focus groups<br>Semi-structured interviews<br>Field notes                  | Travel distance<br>Trips<br>Use of travel modes          | Sample size: not reported<br>Area: urban<br>Sex: males and females<br>Age: not reported                                                                       | European Commission<br><br>Islamic Development Bank<br><br>African Development Bank<br><br>World Bank | First author: not reported<br><br>Single author study             |
| Porter (2011)       | Eastern Africa                                     | Malawi                                                   | None specified                         | Cross-sectional survey | In-depth interviews<br>Focus groups<br>Life histories<br>Accompanied walks | Travel distance<br>Use of travel modes                   | Sample size: n=1,003 individuals<br>Area: urban and rural<br>Sex: males and females                                                                           | United Kingdom<br>Department for International Development                                            | First author: United Kingdom                                      |

|                    |                                                     |                                                                                                                           |                |                                         |                                                                            |                                                                                  |                                                                                                                                  |                                                                                                                    |                                                         |
|--------------------|-----------------------------------------------------|---------------------------------------------------------------------------------------------------------------------------|----------------|-----------------------------------------|----------------------------------------------------------------------------|----------------------------------------------------------------------------------|----------------------------------------------------------------------------------------------------------------------------------|--------------------------------------------------------------------------------------------------------------------|---------------------------------------------------------|
|                    |                                                     |                                                                                                                           |                |                                         |                                                                            | Travel purpose                                                                   | Age: children and adolescents                                                                                                    | United Kingdom Economic and Social Research Council                                                                | Last author: Malawi                                     |
| Bogale (2012)      | Eastern Africa                                      | Ethiopia (Bahir Dar and Hawassa)                                                                                          | None specified | Cross-sectional survey                  | In-depth interviews<br>Field notes                                         | Cycling                                                                          | Sample size: n=408 individuals, n=32 key informants<br>Area: urban<br>Sex: 76% males, 24% females<br>Age: adolescents and adults | No funding reported                                                                                                | First author: Ethiopia<br><br>Single author study       |
| Kola (2012)        | Eastern Africa                                      | Kenya (Kisumu)                                                                                                            | None specified | Cross-sectional survey<br>Land use maps | Focus groups<br>Semi-structured interviews<br>Field notes                  | Use of travel modes<br>Travel purpose                                            | Sample size: n=400 households<br>Area: urban<br>Sex: not reported<br>Age: not reported                                           | No funding reported                                                                                                | First author: Kenya<br><br>Last author: Kenya           |
| Porter (2012)      | Eastern Africa<br>Western Africa<br>Southern Africa | Ghana<br>Malawi<br>South Africa                                                                                           | None specified | Cross-sectional survey                  | In-depth interviews<br>Focus groups<br>Life histories<br>Accompanied walks | Travel time<br>Use of travel modes<br>Travel purpose                             | Sample size: n~3,000 individuals<br>Area: urban and rural<br>Sex: males and females<br>Age: children and adolescents             | United Kingdom Department for International Development<br><br>United Kingdom Economic and Social Research Council | First author: United Kingdom<br><br>Single author study |
| Diaz Olvera (2013) | Central Africa<br>Western Africa                    | Burkina Faso (Ouagadougou)<br>Cameroon (Douala)<br>Guinea (Conakry)<br>Mali (Bamako)<br>Niger (Niamey)<br>Senegal (Dakar) | None specified | Cross-sectional survey                  | Semi-structured interviews                                                 | Travel time<br>Travel distance<br>Trips<br>Use of travel modes<br>Travel purpose | Sample size: n=18,374 individuals, n=60 interviews<br>Area: urban<br>Sex: males and females<br>Age: adolescents and adults       | No funding reported                                                                                                | First author: France<br><br>Last author: France         |
| Porter (2013)      | Eastern Africa                                      | Tanzania (Kibaha district)                                                                                                | None specified | Cross-sectional survey                  | Semi-structured interviews                                                 | Travel time<br>Use of travel modes                                               | Sample size: n=339 individuals<br>Area: rural                                                                                    | Africa Community Access Programme                                                                                  | First author: United Kingdom                            |

|                  |                |                                         |                                    |                        |                                                                    |                                                                                    |                                                                                                                                                                      |                                               |                                                        |
|------------------|----------------|-----------------------------------------|------------------------------------|------------------------|--------------------------------------------------------------------|------------------------------------------------------------------------------------|----------------------------------------------------------------------------------------------------------------------------------------------------------------------|-----------------------------------------------|--------------------------------------------------------|
|                  |                |                                         |                                    |                        |                                                                    | Travel purpose                                                                     | Sex: 39% males, 61% females<br>Age: older adults                                                                                                                     |                                               | Last author: Tanzania                                  |
| Gamberini (2014) | Eastern Africa | Uganda (Kabale district)                | Social and economic exclusion      | Cross-sectional survey | Semi-structured interviews                                         | Number of trips<br>Use of travel modes<br>Choice of travel modes<br>Travel purpose | Sample size: n=268 household heads<br>Area: rural<br>Sex: not reported<br>Age: adults                                                                                | No funding reported                           | First author: United States<br><br>Single author study |
| Ojo (2014)       | Western Africa | Ghana (Accra-Takoradi)                  | None specified                     | Cross-sectional survey | In-depth interviews<br>Field notes                                 | Public transport                                                                   | Sample size: n=497 individuals, n=42 interviews<br>Area: urban<br>Sex: 57% males, 43% females<br>Age: adults                                                         | No funding reported                           | First author: Ghana<br><br>Last author: Ghana          |
| Sam (2014)       | Western Africa | Ghana (Cape Coast)                      | None specified                     | Cross-sectional survey | In-depth interviews                                                | Preference and patronage of public transport mode                                  | Sample size: n=100 students<br>Area: not applicable<br>Sex: 50% males, 50% females<br>Age: 71% aged 21- 25 years, 22% aged 16- 20 years.                             | No funding reported                           | First author: Ghana<br><br>Last author: Ghana          |
| Agyemang (2015)  | Western Africa | Ghana (Greater Accra Metropolitan Area) | None specified                     | Cross-sectional survey | In-depth interviews                                                | Paratransit and public transport                                                   | Sample size: n=30 individuals, n=6 drivers, n=4 key informants, n=120 trips<br>Area: urban<br>Sex: individuals 40% males, 60% females<br>Age: adolescents and adults | No funding reported                           | First author: Ghana<br><br>Single author study         |
| Vermeiren (2015) | Eastern Africa | Uganda (Kampala)                        | Hägerstrand's space-time framework | Cross-sectional survey | Semi-structured interviews<br>Field notes<br>Participatory mapping | Travel time<br>Travel distance<br>Use of travel modes                              | Sample size: n=143 individuals<br>Area: urban<br>Sex: not reported<br>Age: adults                                                                                    | Belgium Fund for Scientific Research Flanders | First author: Belgium<br><br>Last author: Belgium      |



|                  |                 |                                                                                                                                            |                |                                                                                           |                                                                                       |                                                      |                                                                                                                                |                                                         |                                                                 |
|------------------|-----------------|--------------------------------------------------------------------------------------------------------------------------------------------|----------------|-------------------------------------------------------------------------------------------|---------------------------------------------------------------------------------------|------------------------------------------------------|--------------------------------------------------------------------------------------------------------------------------------|---------------------------------------------------------|-----------------------------------------------------------------|
| Mbara (2016)     | Southern Africa | South Africa (Johannesburg)                                                                                                                | None specified | Cross-sectional survey                                                                    | Unstructured interviews                                                               | Tuk tuk                                              | Sample size: n=150 individuals<br>Area: urban<br>Sex: 36% males, 64% females<br>Age: adults                                    | No funding reported                                     | First author: South Africa<br><br>Single author study           |
| Seedhouse (2016) | Western Africa  | Nigeria (Kwara, Nasarawa, Plateau, Borno, Taraba, Yobe, Kaduna, Zamfara, Abia, Ebonyi, Enugu, Cross River, Edo, Ogun, Ondo and Oyo states) | None specified | Cross-sectional survey                                                                    | In-depth interviews                                                                   | Use of travel modes                                  | Sample size: n=92 individuals<br>Area: rural<br>Sex: female only<br>Age: adults                                                | No funding reported                                     | First author: United Kingdom<br><br>Last author: United Kingdom |
| Andreasen (2017) | Eastern Africa  | Tanzania (Dar es Salaam)                                                                                                                   | None specified | GIS analysis                                                                              | Focus groups<br>Semi-structured interviews<br>Key informant interviews<br>Field notes | Travel time<br>Use of travel modes<br>Travel purpose | Sample size: n=174 individuals<br>Area: urban<br>Sex: males and females<br>Age: adults                                         | RurbanAfrica funded by the European Union               | First author: Denmark<br><br>Last author: Denmark               |
| Mokitimi (2017)  | Southern Africa | South Africa (Limpopo Province)                                                                                                            | None specified | Cross-sectional survey<br>Spatial analysis<br>Road accident analysis<br>Photo-elicitation | Semi-structured interviews<br>Field observations<br>Policy analysis                   | Non-motorised travel                                 | Sample size: n=138 individuals<br>Area: rural<br>Sex: 55% female, 45% males<br>Age: 41% aged 26-40 years, 32% aged 18-25 years | No funding reported                                     | First author: South Africa<br><br>Last author: South Africa     |
| Porter (2017)    | Southern Africa | South Africa (Eastern Cape and Gauteng Province)                                                                                           | None specified | Cross-sectional survey                                                                    | In-depth interviews<br>Focus groups<br>Life histories<br>Accompanied walks            | Use of travel modes                                  | Sample size: n=642 individuals, n~200 interviews<br>Area: urban<br>Sex: males and females                                      | United Kingdom Department for International Development | First author: United Kingdom<br><br>Last author: South Africa   |

|                |                 |                                           |                                                          |                                        |                                                                       |                                                                                  |                                                                                                                                   |                                                                                                                 |                                                                             |
|----------------|-----------------|-------------------------------------------|----------------------------------------------------------|----------------------------------------|-----------------------------------------------------------------------|----------------------------------------------------------------------------------|-----------------------------------------------------------------------------------------------------------------------------------|-----------------------------------------------------------------------------------------------------------------|-----------------------------------------------------------------------------|
|                |                 |                                           |                                                          |                                        |                                                                       |                                                                                  | Age: children, adolescents and younger adults                                                                                     | United Kingdom Economic and Social Research Council                                                             |                                                                             |
| Delatte (2018) | Northern Africa | Algeria (Algiers)<br>Morocco (Casablanca) | Maslow's hierarchical pyramid of human needs             | Cross-sectional survey                 | Focus groups                                                          | Public transport                                                                 | Sample size: n=433 individuals<br>Area: urban<br>Sex: males and females (focus groups female only)<br>Age: adolescents and adults | No funding reported                                                                                             | First author: United Arab Emirates<br><br>Last author: United Arab Emirates |
| Evans (2018)   | Eastern Africa  | Uganda (Kampala)                          | None specified                                           | Cross-sectional survey<br>GIS analysis | Semi-structured interviews<br>Photo elicitation                       | Paratransit                                                                      | Sample size: n=60 individuals, n=400 GPS tracks<br>Area: urban<br>Sex: males and females<br>Age: not reported                     | National Geographic                                                                                             | First author: United Kingdom<br><br>Last author: Germany                    |
| Irlam (2018)   | Southern Africa | South Africa (Masiphumelele)              | Kaufmann's 'motility' concept                            | Cross-sectional survey                 | Focus groups                                                          | Cycling                                                                          | Sample size: n=100 individuals, n=1 focus group<br>Area: urban<br>Sex: males and females<br>Age: adults                           | No funding reported                                                                                             | First author: South Africa<br><br>Single author study                       |
| Oviedo (2017)  | Western Africa  | Nigeria (Abuja, Kaduna and Ibadan)        | Person-centred framework linking transport and wellbeing | Cross-sectional survey                 | Semi-structured interviews<br>In-depth interviews                     | Use of travel modes<br>Travel purpose                                            | Sample size: n=337 individuals, n=25 interviews<br>Area: urban<br>Sex: 59% males, 41% females<br>Age: adults                      | United Kingdom Department for International Development<br><br>ICF International<br><br>STO Associates, Nigeria | First author: United Kingdom<br><br>Last author: United Kingdom             |
| Janusz (2019)  | Eastern Africa  | Uganda (Kampala)                          | Hägerstrand's model of timespace constraints             | GIS analysis                           | Semi-structured interviews<br>Key informant interviews<br>Field notes | Travel time<br>Travel distance<br>Trips<br>Use of travel modes<br>Travel purpose | Sample size: n=10 individuals<br>Area: urban<br>Sex: 30% males, 70% females<br>Age: adults                                        | No funding reported                                                                                             | First author: Belgium<br><br>Last author: Belgium                           |

| Quantitative studies |                                   |                                                                                                                                           |  |                        |  |                                                                |                                                                                                                                                                                                                       |                                                                                                             |                                                                 |
|----------------------|-----------------------------------|-------------------------------------------------------------------------------------------------------------------------------------------|--|------------------------|--|----------------------------------------------------------------|-----------------------------------------------------------------------------------------------------------------------------------------------------------------------------------------------------------------------|-------------------------------------------------------------------------------------------------------------|-----------------------------------------------------------------|
| Aworemi (2008)       | Western Africa                    | Nigeria (Ilorin)                                                                                                                          |  | Cross-sectional survey |  | Use of travel modes<br>Travel purpose                          | Sample size: n=256 individuals<br>Area: urban<br>Sex: 66% males, 34% females<br>Age: adolescents and adults                                                                                                           | No funding reported                                                                                         | First author: Nigeria<br><br>Last author: Nigeria               |
| Bryceson (2008)      | Eastern Africa                    | Ethiopia (Hidabo Abote Wereda and Degem Wereda)<br>Zambia (Chipata District, Eastern Province and Luanshya District, Copperbelt Province) |  | Cross-sectional survey |  | Travel time<br>Travel distance<br>Trips<br>Use of travel modes | Sample size: not reported<br>Area: rural<br>Sex: not reported<br>Age: not reported                                                                                                                                    | United Kingdom Department for International Development<br><br>United Kingdom Transport Research Laboratory | First author: United Kingdom<br><br>Last author: United Kingdom |
| Odufuwa (2008)       | Western Africa                    | Nigeria (Lagos)                                                                                                                           |  | Cross-sectional survey |  | Trips<br>Use of travel modes                                   | Sample size: n=356 individuals<br>Area: urban<br>Sex: males and females<br>Age: adults                                                                                                                                | No funding reported                                                                                         | First author: Nigeria<br><br>Single author study                |
| Behrens (2009)       | Southern Africa<br>Eastern Africa | South Africa (Cape Town)<br>Tanzania (Dar Es Salaam)                                                                                      |  | Cross-sectional survey |  | Number of trips and trip stages                                | Sample size: n= 492 individuals (230 from Cape Town, 262 from Dar es Salaam)<br>Area: urban<br>Sex: 49% male; 51% female<br>Age: 9% 12-16 years; 37% 17-25 years; 39% 26-40 years; 12% 41-60 years; 12% over 60 years | Volvo Research and Educational Foundations                                                                  | First author: South Africa<br><br>Last author: Tanzania         |
| Bechstein (2010)     | Southern Africa                   | South Africa (Mamelodi and Nellmapius)                                                                                                    |  | Cross-sectional survey |  | Trips<br>Use of travel modes<br>Travel purpose                 | Sample size: n=178 individuals<br>Area: urban<br>Sex: predominantly male<br>Age: adults                                                                                                                               | No funding reported                                                                                         | First author: South Africa<br><br>Single author study           |

|                  |                 |                          |  |                        |  |                                       |                                                                                                       |                                                                                                                                                                |                                                                                     |
|------------------|-----------------|--------------------------|--|------------------------|--|---------------------------------------|-------------------------------------------------------------------------------------------------------|----------------------------------------------------------------------------------------------------------------------------------------------------------------|-------------------------------------------------------------------------------------|
|                  |                 |                          |  |                        |  |                                       |                                                                                                       |                                                                                                                                                                |                                                                                     |
| Behrens (2010)   | Southern Africa | South Africa (Cape Town) |  | Cross-sectional survey |  | Use of travel modes                   | Sample size: n=993 individuals<br>Area: urban<br>Sex: 49% males, 51% females<br>Age: adults           | African Centre of Excellence for Studies in Public and Non-motorised Transport funded by Volvo Research and Educational Foundations<br><br>Cape Town Metrorail | First author: South Africa<br><br>Last author: South Africa                         |
| Elfiky (2010)    | Northern Africa | Egypt (Kafr Elshiekh)    |  | Cross-sectional survey |  | Use of travel modes                   | Sample size: not reported<br>Area: urban<br>Sex: males and females<br>Age: children and adults        | No funding reported                                                                                                                                            | First author: Egypt<br><br>Single author study                                      |
| Ipingbemi (2010) | Western Africa  | Nigeria (Ibadan)         |  | Cross-sectional survey |  | Use of travel modes                   | Sample size: n=264 individuals<br>Area: urban<br>Sex: 41% males, 59% females<br>Age: older adults     | No funding reported                                                                                                                                            | First author: Nigeria<br><br>Single author study                                    |
| Salon (2010)     | Eastern Africa  | Kenya (Nairobi)          |  | Cross-sectional survey |  | Use of travel modes<br>Travel purpose | Sample size: n=4,375 individuals<br>Area: urban<br>Sex: males and females<br>Age: children and adults | World Bank<br><br>Norwegian Trust Fund                                                                                                                         | First author: United States of America<br><br>Last author: United States of America |
| Alemu (2011)     | Western Africa  | Sierra Leone             |  | Cross-sectional survey |  | Active travel time                    | Sample size: n=4,997 individuals<br>Area: not reported<br>Sex: 46% males, 54% females<br>Age: adults  | No funding reported                                                                                                                                            | First author: Sierra Leone<br><br>Last author: Sierra Leone                         |
| Bwire (2011)     | Eastern Africa  | Tanzania (Dar Es Salaam) |  | Cross-sectional survey |  | Travel time<br>Use of travel modes    | Sample size: n=284 individuals<br>Area: urban                                                         | African Centre of Excellence for Studies in Public                                                                                                             | First author: Tanzania                                                              |

|                 |                                                                                          |                                                                                                                                                                                                                                                              |  |                        |  |                                                |                                                                                                          |                                                                                       |                                                                   |
|-----------------|------------------------------------------------------------------------------------------|--------------------------------------------------------------------------------------------------------------------------------------------------------------------------------------------------------------------------------------------------------------|--|------------------------|--|------------------------------------------------|----------------------------------------------------------------------------------------------------------|---------------------------------------------------------------------------------------|-------------------------------------------------------------------|
|                 |                                                                                          |                                                                                                                                                                                                                                                              |  |                        |  | Travel purpose                                 | Sex: males and females<br>Age: children and parents                                                      | and Non-motorised<br>Transport funded by Volvo Research and Educational Foundations   | Single author study                                               |
| Babinard (2011) | Northern Africa                                                                          | Morocco                                                                                                                                                                                                                                                      |  | Cross-sectional survey |  | Use of travel modes<br>Travel purpose          | Sample size: n=822 individuals<br>Area: urban and rural<br>Sex: 27% males, 73% females<br>Age: adults    | World Bank                                                                            | First author: United States of America<br><br>Single author study |
| Guthold (2011)  | Northern Africa<br>Central Africa<br>Eastern Africa<br>Western Africa<br>Southern Africa | Algeria<br>Benin<br>Botswana<br>Cameroon<br>Cape Verde<br>Chad<br>Cote d'Ivoire<br>Congo<br>Eritrea<br>Ethiopia<br>Gabon<br>Madagascar<br>Malawi<br>Mali<br>Mauritania<br>Mozambique<br>Niger<br>Sao Tome et Principe<br>Sierra Leone<br>Swaziland<br>Zambia |  | Cross-sectional survey |  | Active travel time                             | Sample size: n=57,038 individuals<br>Area: urban and rural<br>Sex: 42% males, 58% females<br>Age: adults | No funding reported                                                                   | First author: Switzerland<br><br>Last author: Switzerland         |
| Masaoe (2011)   | Eastern Africa<br>Southern Africa                                                        | Kenya (Nairobi)<br>South Africa (Cape Town)<br>Tanzania (Dar es Salaam)                                                                                                                                                                                      |  | Cross-sectional survey |  | Trips<br>Use of travel modes<br>Travel purpose | Sample size: n=6,013 households<br>Area: urban<br>Sex: males and females<br>Age: children and adults     | African Centre of Excellence for Studies in Public and Non-motorised Transport funded | First author: Tanzania<br><br>Last author: Kenya                  |

|                 |                 |                           |  |                               |  |                                                                                  |                                                                                                                                                                                  |                                                                                                                                              |                                                                    |
|-----------------|-----------------|---------------------------|--|-------------------------------|--|----------------------------------------------------------------------------------|----------------------------------------------------------------------------------------------------------------------------------------------------------------------------------|----------------------------------------------------------------------------------------------------------------------------------------------|--------------------------------------------------------------------|
|                 |                 |                           |  |                               |  |                                                                                  |                                                                                                                                                                                  | by Volvo Research and Educational Foundations                                                                                                |                                                                    |
| Muhammed (2011) | Western Africa  | Nigeria (Kano state)      |  | Cross-sectional survey        |  | Paratransit                                                                      | Sample size: n=365 individuals<br>Area: urban<br>Sex: males and females<br>Age: adults                                                                                           | No funding reported                                                                                                                          | First author: Nigeria<br><br>Single author study                   |
| Mutiso (2011)   | Eastern Africa  | Kenya (Kisumu and Nakuru) |  | Cross-sectional survey        |  | Use of boda-boda<br>Daily service trips<br>Trip distance                         | Sample size: n= 500 individuals<br>Area: not reported<br>Sex: Almost all were male<br>Age: 33% 18-22 years old, 34% 23-27 years old, 24% 28-32 years old, and 6% 33-37 years old | The Mombasa Polytechnic and the Volvo Research and Educational Foundations                                                                   | First author: South Africa<br><br>Last author: South Africa        |
| Oyeyemi (2011)  | Western Africa  | Nigeria (Ibadan)          |  | Cross-sectional survey        |  | Walking                                                                          | Sample size: n=1,006 individuals<br>Area: urban<br>Sex: 49% males, 51% females<br>Age: adolescents and adults                                                                    | No funding reported                                                                                                                          | First author: Nigeria<br><br>Last author: United States of America |
| Venter (2011)   | Southern Africa | South Africa (Gauteng)    |  | Repeat cross-sectional survey |  | Travel time<br>Travel distance<br>Trips<br>Use of travel modes<br>Travel purpose | Sample size: n=16,729 individuals<br>Area: urban<br>Sex: males and females<br>Age: adolescents and adults                                                                        | Gauteng City-Region Observatory funded by University of Johannesburg, University of the Witwatersrand, and the Gauteng Provincial Government | First author: South Africa<br><br>Last author: South Africa        |
| Venter (2011)   | Southern Africa | South Africa              |  | Cross-sectional survey        |  | Travel time<br>Use of travel modes<br>Travel purpose                             | Sample size: n=163,064 individuals<br>Area: urban and rural<br>Sex: males and females<br>Age: adults                                                                             | South Africa Department of Transport                                                                                                         | First author: South Africa<br><br>Single author study              |

|                       |                 |                                                 |  |                                                                     |  |                                                                                  |                                                                                                                                                                                                                 |                                                                                                   |                                                                   |
|-----------------------|-----------------|-------------------------------------------------|--|---------------------------------------------------------------------|--|----------------------------------------------------------------------------------|-----------------------------------------------------------------------------------------------------------------------------------------------------------------------------------------------------------------|---------------------------------------------------------------------------------------------------|-------------------------------------------------------------------|
| Walter (2011)         | Southern Africa | South Africa (Nelson Mandela Metropolitan Area) |  | Cross-sectional survey                                              |  | Active travel time                                                               | Sample size: n=180 individuals<br>Area: urban<br>Sex: 100% females<br>Age: adults                                                                                                                               | South Africa National Research Foundation<br><br>Nelson Mandela Metropolitan University           | First author: South Africa<br><br>Last author: South Africa       |
| Abiola (2012)         | Western Africa  | Nigeria (Abeokuta)                              |  | Cross-sectional survey                                              |  | Trips<br>Use of travel modes                                                     | Sample size: n=1,300 individuals<br>Area: urban<br>Sex: not reported<br>Age: adults                                                                                                                             | No funding reported                                                                               | First author: Nigeria<br><br>Last author: Nigeria                 |
| Adetunji (2012)       | Western Africa  | Nigeria (Ilesa)                                 |  | Cross-sectional survey<br>Regional and national government datasets |  | Travel time<br>Travel distance<br>Trips<br>Use of travel modes<br>Travel purpose | Sample size: n=1,200 individuals<br>Area: urban<br>Sex: 52% males, 48% females<br>Age: adults                                                                                                                   | No funding reported                                                                               | First author: Nigeria<br><br>Single author study                  |
| Ibitayo (2012)        | Western Africa  | Nigeria (Lagos)                                 |  | Cross-sectional survey                                              |  | Transport mode<br>Time of the day to commute                                     | Sample size: n=200 individuals<br>Area: urban<br>Sex: 56.6% males<br>Age: 36% were 30-39 years old, 25.5% 40-49 years old, 19.3% 20-29 years, 10.9% 50-59 years old, 5.6% 60-69 years old, 2.7% 60-69 years old | No funding reported                                                                               | First author: United States<br><br>Single author study            |
| Nkurunziza (2012) (1) | Eastern Africa  | Tanzania (Dar Es Salaam)                        |  | Cross-sectional survey                                              |  | Use of travel modes<br>Choice of travel modes                                    | Sample size: n=598 individuals<br>Area: urban<br>Sex: not reported<br>Age: not reported                                                                                                                         | Dutch Ministry of Development Cooperation co-funded by the University of Twente (The Netherlands) | First author: The Netherlands<br><br>Last author: The Netherlands |
| Nkurunziza (2012) (2) | Eastern Africa  | Tanzania (Dar Es Salaam)                        |  | Cross-sectional survey                                              |  | Use of travel modes                                                              | Sample size: n=598 individuals<br>Area: urban                                                                                                                                                                   | No funding reported                                                                               | First author: The Netherlands                                     |

|                |                |                  |  |                        |  |                                                                                         |                                                                                                                                                                                                                                                                       |                                           |                                                                 |
|----------------|----------------|------------------|--|------------------------|--|-----------------------------------------------------------------------------------------|-----------------------------------------------------------------------------------------------------------------------------------------------------------------------------------------------------------------------------------------------------------------------|-------------------------------------------|-----------------------------------------------------------------|
|                |                |                  |  |                        |  | Choice of travel modes                                                                  | Sex: 25% female, 75% male<br>Age: 10y to >45y                                                                                                                                                                                                                         |                                           | Last author:<br>The Netherlands                                 |
| Nwaogbe (2012) | Western Africa | Nigeria (Aba)    |  | Cross-sectional survey |  | Perception on safety, cost, comfort, availability of the service<br>Transport mode use  | Sample size: n= 229 individuals<br>Area: urban<br>Sex: 64% male and 36% female<br>Age: 10% below the age of 15 years; 33% in the range 15–24 years; 19% between 25 years and 34 years; 12% from 35–44 years; 10% aged 45–54 years; while 16% were 55 years and above. | No funding reported                       | First author:<br>The Nigeria<br><br>Last author:<br>The Nigeria |
| Odufuwa (2012) | Western Africa | Nigeria (Ibadan) |  | Cross-sectional survey |  | Travel time<br>Travel distance<br>Trips<br>Use of travel modes<br>Travel purpose        | Sample size: n=203 individuals<br>Area: urban<br>Sex: males and females<br>Age: adults                                                                                                                                                                                | No funding reported                       | First author:<br>Nigeria<br><br>Last author:<br>Nigeria         |
| Olawole (2012) | Western Africa | Nigeria (Lagos)  |  | Cross-sectional survey |  | BRT use and frequency<br>Distance to access BRT terminus<br>Mode to access BRT terminus | Sample size: n=200 individuals<br>Area: urban<br>Sex: 59% were males.<br>Age: 28% below 20 years, 63% between 21 and 40 years, 7% between 41 and 60 years. Those above 60 years old accounted for the remaining 2%.                                                   | No funding reported                       | First author:<br>Nigeria<br><br>Single author study             |
| Salon (2012)   | Eastern Africa | Kenya (Nairobi)  |  | Cross-sectional survey |  | Travel distance<br>Use of travel modes                                                  | Sample size: n=7,500 individuals<br>Area: urban<br>Sex: males and females<br>Age: children and adults                                                                                                                                                                 | Volvo Research and Educational Foundation | First author:<br>United States of America                       |



|                    |                                                     |                                                                 |  |                        |  |                                                                         |                                                                                                             |                                                                              |                                                                                     |
|--------------------|-----------------------------------------------------|-----------------------------------------------------------------|--|------------------------|--|-------------------------------------------------------------------------|-------------------------------------------------------------------------------------------------------------|------------------------------------------------------------------------------|-------------------------------------------------------------------------------------|
|                    |                                                     |                                                                 |  |                        |  |                                                                         |                                                                                                             | The Earth Institute at Columbia University, United States of America         | Last author: Kenya                                                                  |
| Alade (2013)       | Western Africa                                      | Nigeria (Lagos)                                                 |  | Cross-sectional survey |  | Travel time<br>Trips<br>Use of travel modes<br>Travel purpose           | Sample size: n=155 individuals<br>Area: urban<br>Sex: 51% males, 49% females<br>Age: older adults           | No funding reported                                                          | First author: Nigeria<br><br>Last author: Nigeria                                   |
| Amoh-Gyimah (2013) | Western Africa                                      | Ghana (Kumasi)                                                  |  | Cross-sectional survey |  | Travel time<br>Travel distance<br>Use of travel modes<br>Travel purpose | Sample size: n=372 individuals<br>Area: urban<br>Sex: 68% males, 32% females<br>Age: adults                 | No funding reported                                                          | First author: Ghana<br><br>Last author: Nigeria                                     |
| Matous (2013)      | Eastern Africa                                      | Ethiopia (Tiyo District)                                        |  | Cross-sectional survey |  | Travel time<br>Travel frequency<br>Travel purpose                       | Sample size: n=297 individuals<br>Area: rural<br>Sex: 87% male<br>Age: 45.5 (SD 16.0) years                 | Japanese Ministry of Education, Culture, Sports, Science and Technology      | First author: The Japan<br><br>Last author: The Japan                               |
| Nkurunziza (2013)  | Eastern Africa                                      | Tanzania (Dar Es Salaam)                                        |  | Cross-sectional survey |  | Cycling                                                                 | Sample size: n=448 individuals<br>Area: urban<br>Sex: 87% males, 13% females<br>Age: adolescents and adults | The Netherlands Cycling Academic Network and Interface for Cycling Expertise | First author: The Netherlands<br><br>Last author: The Netherlands                   |
| Dugas (2014)       | Eastern Africa<br>Western Africa<br>Southern Africa | Ghana (Nkwantakese)<br>Seychelles<br>South Africa (Khayelitsha) |  | Cross-sectional survey |  | Active travel time                                                      | Sample size: n=1,504 individuals<br>Area: urban and rural<br>Sex: males and females<br>Age: adults          | No funding reported                                                          | First author: United States of America<br><br>Last author: United States of America |

|                 |                                                     |                                     |  |                        |  |                    |                                                                                                          |                                                                                                                                                                                                                                                                                |                                                                                     |
|-----------------|-----------------------------------------------------|-------------------------------------|--|------------------------|--|--------------------|----------------------------------------------------------------------------------------------------------|--------------------------------------------------------------------------------------------------------------------------------------------------------------------------------------------------------------------------------------------------------------------------------|-------------------------------------------------------------------------------------|
| Gradidge (2014) | Southern Africa                                     | South Africa (Soweto)               |  | Cross-sectional survey |  | Active travel time | Sample size: n=977 individuals<br>Area: urban<br>Sex: 100% female<br>Age: adults                         | Medical Research Council of South Africa<br><br>University of the Witwatersrand<br><br>United Kingdom Wellcome Trust<br><br>United Kingdom Department for International Development<br><br>United Kingdom Medical Research Council<br><br>The Carnegie Corporation of New York | First author: South Africa<br><br>Last author: South Africa                         |
| Joshi (2014)    | Eastern Africa                                      | Kenya (Kibera)                      |  | Cross-sectional survey |  | Active travel time | Sample size: n=2,061 individuals<br>Area: urban<br>Sex: 51% males, 49% females<br>Age: adults            | No funding reported                                                                                                                                                                                                                                                            | First author: Kenya<br><br>Last author: Kenya                                       |
| Luke (2014)     | Eastern Africa<br>Western Africa<br>Southern Africa | Ghana<br>Seychelles<br>South Africa |  | Cross-sectional survey |  | Active travel time | Sample size: n=1,504 individuals<br>Area: urban and rural<br>Sex: males and females<br>Age: older adults | United States National Institutes of Health                                                                                                                                                                                                                                    | First author: United States of America<br><br>Last author: United States of America |
| Mfinanga (2014) | Eastern Africa                                      | Tanzania (Dar es Salaam)            |  | Cross-sectional survey |  | Walking            | Sample size: n=386 individuals<br>Area: urban<br>Sex: 42% males, 58% females                             | No funding reported                                                                                                                                                                                                                                                            | First author: Tanzania<br><br>Single author study                                   |

|                        |                                   |                          |  |                        |  |                                                                                   |                                                                                                                                                     |                                                                                                                 |                                                                 |
|------------------------|-----------------------------------|--------------------------|--|------------------------|--|-----------------------------------------------------------------------------------|-----------------------------------------------------------------------------------------------------------------------------------------------------|-----------------------------------------------------------------------------------------------------------------|-----------------------------------------------------------------|
|                        |                                   |                          |  |                        |  |                                                                                   | Age: children and adults                                                                                                                            |                                                                                                                 |                                                                 |
| Olawole (2014)         | Western Africa                    | Nigeria (Osogbo)         |  | Cross-sectional survey |  | Travel distance<br>Trips<br>Use of travel modes<br>Travel purpose                 | Sample size: n=250 individuals<br>Area: urban<br>Sex: 51% males, 49% females<br>Age: older adults                                                   | No funding reported                                                                                             | First author: Nigeria<br><br>Last author: Nigeria               |
| Oyeyemi (2014)         | Western Africa                    | Nigeria (Maiduguri)      |  |                        |  | Transport-related physical activity.<br>Time and intensity<br>BMI, blood pressure | Sample size: n=180 individuals<br>Area: not reported<br>Sex: 50% female, 50% male<br>Age: 35.6±10.3 years                                           | No funding reported                                                                                             | First author: Nigeria<br><br>Last author: Nigeria               |
| Baldew (2015)          | Caribbean                         | Suriname                 |  | Cross-sectional survey |  | Transport-related physical activity<br>Active travel modes (walking/cycling)      | Sample size: n=180 individuals<br>Area: 76 % urban, 24% rural<br>Sex: 48.6% male, 51.4% female<br>Age: average age was 36.2 years (range 15 to 64). | Surinamese Government.<br>NV Consolidated Industries Corporation (CIC)<br>Staatsolie Maatschappij Suriname N.V. | First author: Suriname<br><br>Last author: Belgium              |
| Kolbe-Alexander (2015) | Southern Africa                   | South Africa (Cape Town) |  | Cross-sectional survey |  | Active travel time                                                                | Sample size: n=44 individuals<br>Area: urban<br>Sex: 23% males, 77% females<br>Age: older adults                                                    | University of Cape Town                                                                                         | First author: South Africa<br><br>Last author: South Africa     |
| Laverty (2015)         | Western Africa<br>Southern Africa | Ghana<br>South Africa    |  | Cross-sectional survey |  | Active travel time                                                                | Sample size: n=9,800 individuals<br>Area: urban and rural<br>Sex: males and females<br>Age: adults                                                  | No funding reported                                                                                             | First author: United Kingdom<br><br>Last author: United Kingdom |
| Olawole (2015)         | Western Africa                    | Nigeria (Ilesa)          |  | Cross-sectional survey |  | Travel time<br>Travel distance                                                    | Sample size: n=378 individuals<br>Area: urban                                                                                                       | No funding reported                                                                                             | First author: Nigeria                                           |

|                       |                    |                             |  |                                      |  |                                                                     |                                                                                                                        |                                                                                   |                                                                   |
|-----------------------|--------------------|-----------------------------|--|--------------------------------------|--|---------------------------------------------------------------------|------------------------------------------------------------------------------------------------------------------------|-----------------------------------------------------------------------------------|-------------------------------------------------------------------|
|                       |                    |                             |  |                                      |  | Trips<br>Use of travel<br>modes<br>Travel<br>purpose                | Sex: 62% males, 38%<br>females<br>Age: older adults                                                                    |                                                                                   | Single author<br>study                                            |
| Salau (2015)          | Western<br>Africa  | Nigeria (Lagos)             |  | Cross-<br>sectional<br>survey        |  | Travel time<br>Travel<br>distance<br>Use of travel<br>modes         | Sample size: n=1,475<br>individuals<br>Area: urban<br>Sex: 60% males, 40%<br>females<br>Age: adolescents and<br>adults | No funding<br>reported                                                            | First author:<br>Nigeria<br><br>Single author<br>study            |
| Weinstock<br>(2015)   | Eastern<br>Africa  | Kenya (Nairobi)             |  | Cross-<br>sectional<br>survey        |  | Transport<br>mode<br>Passenger<br>behaviour<br>Trip patterns        | Sample size: n=48 routes<br>Area: not reported<br>Sex: not reported<br>Age: not reported                               | Institute for<br>Transportation &<br>Development<br>Policy (ITDP)<br>ClimateWorks | First author:<br>not reported<br><br>Last author:<br>not reported |
| Acheampong<br>(2016)  | Western<br>Africa  | Ghana (Kumasi)              |  | Cross-<br>sectional<br>survey        |  | Cycling                                                             | Sample size: n=550<br>individuals<br>Area: urban<br>Sex: 49% males, 51%<br>females<br>Age: adults                      | No funding<br>reported                                                            | First author:<br>United<br>Kingdom<br><br>Single author<br>study  |
| Bartels<br>(2016)     | Southern<br>Africa | South Africa<br>(Cape Town) |  | Cross-<br>sectional<br>survey        |  | Active travel<br>time<br>Travel<br>purpose                          | Sample size: n=1,321<br>individuals<br>Area: urban<br>Sex: males and females<br>Age: adults                            | National Research<br>Foundation of<br>South Africa                                | First author:<br>South Africa<br><br>Last author:<br>South Africa |
| Diaz Olvera<br>(2016) | Western<br>Africa  | Senegal (Dakar)             |  | Repeat cross-<br>sectional<br>survey |  | Travel time<br>Trips<br>Use of travel<br>modes<br>Travel<br>purpose | Sample size: n=22,073<br>individuals<br>Area: urban<br>Sex: males and females<br>Age: adolescents and<br>adults        | Executive Council<br>of Urban<br>Transport in<br>Dakar                            | First author:<br>France<br><br>Last author:<br>France             |
| Guwatudde<br>(2016)   | Eastern<br>Africa  | Uganda                      |  | Cross-<br>sectional<br>survey        |  | Active travel<br>time                                               | Sample size: n=3,987<br>individuals<br>Area: urban and rural                                                           | Uganda<br>government                                                              | First author:<br>Uganda                                           |

|                      |                |                                         |  |                        |  |                                                       |                                                                                                       |                                                                                                                                       |                                                         |
|----------------------|----------------|-----------------------------------------|--|------------------------|--|-------------------------------------------------------|-------------------------------------------------------------------------------------------------------|---------------------------------------------------------------------------------------------------------------------------------------|---------------------------------------------------------|
|                      |                |                                         |  |                        |  |                                                       | Sex: 40% males, 60% females<br>Age: adults                                                            | World Health Organization<br><br>World Diabetes Foundation<br><br>United Nations Development Program                                  | Last author:<br>Uganda                                  |
| Nigatu Haregu (2016) | Eastern Africa | Kenya (Nairobi)                         |  | Cross-sectional survey |  | Active travel time                                    | Sample size: n=5,190 individuals<br>Area: urban<br>Sex: 54% males, 46% females<br>Age: adults         | United Kingdom Wellcome Trust                                                                                                         | First author:<br>Kenya<br><br>Last author:<br>Kenya     |
| Olawole (2016)       | Western Africa | Nigeria (Ile-Ife)                       |  | Cross-sectional survey |  | Travel time<br>Travel distance<br>Use of travel modes | Sample size: n=1,638 individuals<br>Area: urban<br>Sex: 63% males, 37% females<br>Age: younger adults | No funding reported                                                                                                                   | First author:<br>Nigeria<br><br>Last author:<br>Nigeria |
| Oyeyemi (2016)       | Western Africa | Nigeria (Maiduguri)                     |  | Cross-sectional survey |  | Active travel time                                    | Sample size: n=1,006 individuals<br>Area: urban<br>Sex: 50% males, 50% females<br>Age: adolescents    | No funding reported                                                                                                                   | First author:<br>Nigeria<br><br>Last author:<br>Nigeria |
| Saddier (2016)       | Western Africa | Ghana (Greater Accra Metropolitan Area) |  | GIS analysis           |  | Paratransit                                           | Sample size: n=580 paratransit routes<br>Area: urban<br>Sex: not applicable<br>Age: not applicable    | Canada Fonds Québécois de la Recherche sur la Société et la Culture Nouveaux Chercheurs Program<br><br>Canada Research Chairs Program | First author:<br>Ghana<br><br>Last author:<br>Canada    |

|                     |                 |                                              |  |                        |  |                                                                            |                                                                                                                                        |                                                                              |                                                               |
|---------------------|-----------------|----------------------------------------------|--|------------------------|--|----------------------------------------------------------------------------|----------------------------------------------------------------------------------------------------------------------------------------|------------------------------------------------------------------------------|---------------------------------------------------------------|
|                     |                 |                                              |  |                        |  |                                                                            |                                                                                                                                        | Canadian Foundation for Innovation                                           |                                                               |
| Agyemang (2017)     | Western Africa  | Ghana (Greater Accra Metropolitan Area)      |  | Cross-sectional survey |  | Travel distance<br>Use of travel modes<br>Travel purpose                   | Sample size: n=613 individuals<br>Area: urban<br>Sex: males and females<br>Age: adults                                                 | Danish International Development Agency                                      | First author: Ghana<br><br>Single author study                |
| Christoph (2017)    | Eastern Africa  | Uganda                                       |  | Cross-sectional survey |  | Time in active travel<br>Use of travel modes<br>Purpose of travel mode use | Sample size: n=148 individuals<br>Area: 51% rural, 49% urban<br>Sex: 51% female, 49% male<br>Age: 11-16 years, mean age 12.1y (+ 1.1y) | USDA National Institute of Food and Agriculture                              | First author: United States<br><br>Last author: United States |
| Groot (2017)        | Eastern Africa  | Kenya (Nairobi)                              |  | Cross-sectional survey |  | Active travel time                                                         | Sample size: n=10,128 individuals<br>Area: urban and rural<br>Sex: males and females<br>Age: adults                                    | No funding reported                                                          | First author: The Netherlands<br><br>Last author: Kenya       |
| John (2017)         | Eastern Africa  | Tanzania (Magu district)                     |  | Cross-sectional survey |  | Active travel time                                                         | Sample size: n=5,663 individuals<br>Area: urban and rural<br>Sex: 59% males, 41% females<br>Age: adolescents and adults                | No funding reported                                                          | First author: Tanzania<br><br>Last author: Tanzania           |
| Machado-León (2017) | Northern Africa | Algeria (Algiers)                            |  | Cross-sectional survey |  | Use of travel modes<br>Travel purpose                                      | Sample size: n=1,454 individuals<br>Area: urban<br>Sex: 54% males, 46% females<br>Age: adolescents and adults                          | Spanish Initiatives of Development Cooperation Centre, University of Granada | First author: Spain<br><br>Last author: Spain                 |
| Malambo (2017)      | Southern Africa | South Africa (Langa, Cape Town, Mount Frere) |  | Cross-sectional survey |  | Time in active travel                                                      | Sample size: n=671 households<br>Area: urban and rural                                                                                 | Social Innovation in Public Health Impulse                                   | First author: South Africa                                    |

|                     |                 |                                     |  |                        |  |                                                                           |                                                                                                              |                                                                                                                                                                                                                                                                               |                                                                   |
|---------------------|-----------------|-------------------------------------|--|------------------------|--|---------------------------------------------------------------------------|--------------------------------------------------------------------------------------------------------------|-------------------------------------------------------------------------------------------------------------------------------------------------------------------------------------------------------------------------------------------------------------------------------|-------------------------------------------------------------------|
|                     |                 |                                     |  |                        |  |                                                                           | Sex: 23.8% male, 76.2% female<br>Age: 30% aged 35-44 years, 34.5% aged 45-54 years, 35.5% aged 55+ years     | fellowship program                                                                                                                                                                                                                                                            | Last author:<br>South Africa                                      |
| McKay (2017)        | Southern Africa | South Africa (Gauteng)              |  | Cross-sectional survey |  | Trip Generation<br>Trip distribution<br>Modal split<br>Traffic assignment | Sample size: not reported<br>Area: not reported<br>Sex: not reported<br>Age: not reported                    | Gauteng City Regional Observatory (GCRO)                                                                                                                                                                                                                                      | First author:<br>South Africa<br><br>Last author:<br>South Africa |
| Micklesfield (2017) | Southern Africa | South Africa (Agincourt and Soweto) |  | Cross-sectional survey |  | Active travel time                                                        | Sample size: n=1,019 individuals<br>Area: urban and rural<br>Sex: 100% female<br>Age: adolescents and adults | Medical Research Council of South Africa<br><br>University of the Witwatersrand<br><br>South Africa Claude Leon Foundation<br><br>United Kingdom Wellcome Trust<br><br>United Kingdom Department for International Development<br><br>United Kingdom Medical Research Council | First author:<br>South Africa<br><br>Last author:<br>South Africa |
| Olawole (2017)      | Western Africa  | Nigeria (Ile-Ife)                   |  | Cross-sectional survey |  | Travel distance<br>Trips<br>Use of travel modes                           | Sample size: n=273 individuals<br>Area: rural<br>Sex: 49% males, 51% females<br>Age: older adults            | No funding reported                                                                                                                                                                                                                                                           | First author:<br>Nigeria<br><br>Single author study               |

|                 |                                                                                         |                                                                      |  |                               |  |                                                                   |                                                                                                                                   |                                                                                               |                                                                                     |
|-----------------|-----------------------------------------------------------------------------------------|----------------------------------------------------------------------|--|-------------------------------|--|-------------------------------------------------------------------|-----------------------------------------------------------------------------------------------------------------------------------|-----------------------------------------------------------------------------------------------|-------------------------------------------------------------------------------------|
|                 |                                                                                         |                                                                      |  |                               |  | Travel purpose                                                    |                                                                                                                                   |                                                                                               |                                                                                     |
| Olojede (2017)  | Western Africa                                                                          | Nigeria (Ilesa)                                                      |  | Cross-sectional survey        |  | Walking                                                           | Sample size: n=524 individuals<br>Area: urban<br>Sex: 53% males, 47% females<br>Age: adults                                       | No funding reported                                                                           | First author: Nigeria<br><br>Last author: Nigeria                                   |
| Oyeyemi (2017)  | Central Africa<br>Eastern Africa<br>Western Africa<br>Southern Africa<br>Eastern Africa | Cameroon<br>Ghana<br>Mozambique<br>Nigeria<br>South Africa<br>Uganda |  | Cross-sectional survey        |  | Time in active travel (walking)                                   | Sample size: n=469 individuals<br>Area: Urban, peri-urban and rural<br>Sex: 49.7% female, 50.3% male<br>Age: 32.0 (SD 12.5) years | NIH Grant R01 HL111378<br>IDRC Grant 107144-001<br>The Canadian Institutes of Health Research | First author: Nigeria<br><br>Last author: Unites States                             |
| Sabry (2017)    | Northern Africa                                                                         | Egypt (Alexandria)                                                   |  | Cross-sectional survey        |  | Travel distance<br>Trips<br>Use of travel modes<br>Travel purpose | Sample size: n=182 individuals<br>Area: urban<br>Sex: 47% males, 53% females<br>Age: adults                                       | No funding reported                                                                           | First author: Egypt<br><br>Last author: Egypt                                       |
| Schuyler (2017) | Eastern Africa                                                                          | Uganda (Rakai)                                                       |  | Repeat cross-sectional survey |  | Travel time<br>Travel purpose                                     | Sample size: n=10,042 observations<br>Area: urban and rural<br>Sex: 40% males, 60% females<br>Age: adolescents and younger adults | United States of America National Institutes of Health                                        | First author: United States of America<br><br>Last author: United States of America |
| Tegebu (2017)   | Eastern Africa                                                                          | Ethiopia (Tigray)                                                    |  | Cross-sectional survey        |  | Number of trips<br>Use of travel modes<br>Distance travelled      | Sample size: n=529 households<br>Area: rural<br>Sex: not reported<br>Age: not reported                                            | No funding reported                                                                           | First author: Ethiopia<br><br>Last author: Ethiopia                                 |



|                    |                 |                                        |  |                        |  |                                                      |                                                                                                                         |                                        |                                                             |
|--------------------|-----------------|----------------------------------------|--|------------------------|--|------------------------------------------------------|-------------------------------------------------------------------------------------------------------------------------|----------------------------------------|-------------------------------------------------------------|
| Thaba (2017)       | Southern Africa | South Africa (Johannesburg)            |  | Cross-sectional survey |  | Transport mode use (cycling)                         | Sample size: n=480 individuals<br>Area: urban<br>Sex: not reported<br>Age: university students                          | No funding reported                    | First author: South Africa<br><br>Last author: South Africa |
| Acheampong (2018)  | Western Africa  | Ghana (Tamale)                         |  | Cross-sectional survey |  | Cycling                                              | Sample size: n=455 individuals<br>Area: urban<br>Sex: 59% males, 41% females<br>Age: adults                             | No funding reported                    | First author: Ireland<br><br>Last author: Hong Kong         |
| Baouni (2018)      | Northern Africa | Algeria (Algiers)                      |  | Cross-sectional survey |  | Public transport                                     | Sample size: n=347 individuals<br>Area: urban<br>Sex: 49% males, 51% females<br>Age: adolescents and adults             | No funding reported                    | First author: Algeria<br><br>Last author: Spain             |
| Chakwizira (2018)  | Southern Africa | South Africa (Gauteng province)        |  | Cross-sectional survey |  | Travel time<br>Use of travel modes<br>Travel purpose | Sample size: n=1,150 individuals<br>Area: urban<br>Sex: males and females<br>Age: adults                                | No funding reported                    | First author: South Africa<br><br>Last author: Nigeria      |
| El-Sherbiny (2018) | Northern Africa | Egypt (Fayoum governorate)             |  | Cross-sectional survey |  | Active travel time                                   | Sample size: n=5,000 individuals<br>Area: urban and rural<br>Sex: 46% males, 54% females<br>Age: adolescents and adults | No funding reported                    | First author: Egypt<br><br>Last author: Egypt               |
| Lengana (2018)     | Southern Africa | South Africa (Johannesburg)            |  | Cross-sectional survey |  | Travel mode use                                      | Sample size: n=125 individuals<br>Area: urban<br>Sex: not reported<br>Age: between the ages of 18 to 60                 | No funding reported                    | First author: South Africa<br>Last author: South Africa     |
| Tembe (2018)       | Eastern Africa  | Kenya (Nairobi)<br>Mozambique (Maputo) |  | Cross-sectional survey |  | Use of travel modes<br>Travel purpose                | Sample size: n=71,545 individuals<br>Area: urban<br>Sex: males and females                                              | Japan International Cooperation Agency | First author: Japan                                         |

|                    |                                   |                             |  |                        |  |                                    |                                                                                                              |                                                                                                                                                                                                                                                           |                                                               |
|--------------------|-----------------------------------|-----------------------------|--|------------------------|--|------------------------------------|--------------------------------------------------------------------------------------------------------------|-----------------------------------------------------------------------------------------------------------------------------------------------------------------------------------------------------------------------------------------------------------|---------------------------------------------------------------|
|                    |                                   |                             |  |                        |  |                                    | Age: adolescents and adults                                                                                  |                                                                                                                                                                                                                                                           | Last author: Japan                                            |
| Scordia (2018)     | Southern Africa                   | South Africa (Johannesburg) |  | Cross-sectional survey |  | Travel distance<br>Travel mode use | Sample size: not reported<br>Area: urban<br>Sex: not reported<br>Age: not reported                           | No funding reported                                                                                                                                                                                                                                       | First author: United States<br><br>Last author: United States |
| Vancampfort (2018) | Western Africa<br>Southern Africa | Ghana<br><br>South Africa   |  | Cross-sectional survey |  | Time in active travel              | Sample size: n=1975 (Ghana), n=1484 (South Africa)<br>Area: not reported<br>Sex: not reported<br>Age: adults | ISCIII - General Branch Evaluation and Promotion of Health Research<br>The European Regional Development Fund (ERDF-FEDER)<br>National Institute for Health Research<br>Collaboration for Leadership in Applied Health Research & Care<br>Funding scheme. | First author: Belgium<br><br>Last author: Spain               |
| Davy (2019)        | Southern Africa                   | South Africa (Durban)       |  | Cross-sectional survey |  | Travel time                        | Sample size: n=10 individuals<br>Area: urban<br>Sex: 50% males, 50% females<br>Age: adults                   | No funding reported                                                                                                                                                                                                                                       | First author: South Africa<br><br>Last author: South Africa   |
| Oyeyemi (2019)     | Western Africa                    | Nigeria (Maiduguri)         |  | Cross-sectional survey |  | Walking                            | Sample size: n=353 individuals<br>Area: urban<br>Sex: 60% males, 40% females<br>Age: older adults            | No funding reported                                                                                                                                                                                                                                       | First author: Nigeria<br><br>Last author: Nigeria             |

GIS – geographic information system

**File S10. Exposures and definitions identified in Analysis 1.**

| Theme                      | Factor                                   | Definition                                                                                                                                                                                                                                                                                                                                                                                                                                                                 |
|----------------------------|------------------------------------------|----------------------------------------------------------------------------------------------------------------------------------------------------------------------------------------------------------------------------------------------------------------------------------------------------------------------------------------------------------------------------------------------------------------------------------------------------------------------------|
| Individual characteristics | SES (broadly defined)                    | It comprises any of the following factors reported by participants: individual or household socioeconomic status, household assets, household size, education level, employment status, occupation, income, vehicle ownership, bike ownership, family composition, family size, phone ownership (household), type of livelihoods (home-based enterprise, enterprise operators whose business is located elsewhere and itinerant workers), purchasing power and thus wealth |
| Individual characteristics | Area of residence (broadly defined)      | It comprises any of the following factors reported by participants: living in slums, urban or rural dwellers, area of residence, distance needed to travel, proximity to BRT, city of residence                                                                                                                                                                                                                                                                            |
| Individual characteristics | Sex                                      | Sex of the participants                                                                                                                                                                                                                                                                                                                                                                                                                                                    |
| Individual characteristics | Age                                      | Age of the participants                                                                                                                                                                                                                                                                                                                                                                                                                                                    |
| Individual characteristics | Country                                  | Country of residence of the participant                                                                                                                                                                                                                                                                                                                                                                                                                                    |
| Individual characteristics | Health status                            | Self-reported health status of the participants                                                                                                                                                                                                                                                                                                                                                                                                                            |
| Individual characteristics | Attitude towards particular travel modes | Attitudes and perceptions in relation to a mode                                                                                                                                                                                                                                                                                                                                                                                                                            |
| Individual characteristics | Trip purpose                             | Reasons for journey such as health- or work-related trips                                                                                                                                                                                                                                                                                                                                                                                                                  |
| Individual characteristics | Ethnicity                                | The fact or state of belonging to a social group that has a common national or cultural tradition                                                                                                                                                                                                                                                                                                                                                                          |
| Individual characteristics | Marital status                           | One's situation with regard to whether one is single, married, separated, divorced, or widowed.                                                                                                                                                                                                                                                                                                                                                                            |
| Individual characteristics | Ability to cycle                         | Participant's perceived (lack of) cycling skills or confidence in cycling skills or perception of not being fit or well enough to cycle                                                                                                                                                                                                                                                                                                                                    |
| Individual characteristics | Reason for travel                        | Either for recreation purposes, work purposes, study purposes or other reasons                                                                                                                                                                                                                                                                                                                                                                                             |
| Individual characteristics | Life events/shocks                       | Change in personal circumstances either by 'life shocks' consisting of incidents (e.g., mugging) or by 'life events' consisting of life stage events (e.g., graduated from school), relocation events (e.g., moved house), mobility events (e.g., bought car)                                                                                                                                                                                                              |
| Individual characteristics | Knowledge about travel modes             | Participants' lack of awareness on how to use and navigate the transport system                                                                                                                                                                                                                                                                                                                                                                                            |

|                             |                             |                                                                                                                                                                                                                              |
|-----------------------------|-----------------------------|------------------------------------------------------------------------------------------------------------------------------------------------------------------------------------------------------------------------------|
| Individual characteristics  | Business location           | Participants' physical distance of their business from other parts of the city, also considering the perceptions of the terrain to be crossed including muddy, dusty, and poor-quality roads to reach the location.          |
| Individual characteristics  | Tiredness                   | Participant's consideration of the bodily energy required to move                                                                                                                                                            |
| Individual characteristics  | Trip destination            | Place to which participants are journeying                                                                                                                                                                                   |
| Individual characteristics  | BRT users                   | Passengers utilising the BRT service                                                                                                                                                                                         |
| Individual characteristics  | Time of day of travel       | Temporal distribution of trips characterized by peak-hour periods                                                                                                                                                            |
| Individual characteristics  | Traffic awareness           | Participant's traffic education/ enlightenment                                                                                                                                                                               |
| Individual characteristics  | Place of birth              | Place where the participant was born                                                                                                                                                                                         |
| Individual characteristics  | Hold driving license        | Participants holding a valid and official permission to drive a car                                                                                                                                                          |
| Individual characteristics  | Religion                    | It refers to participant's religion being the same or different from neighbour's religion as a factor of frequency of social walking                                                                                         |
| Individual characteristics  | Frequency of social contact | Frequency of social meetings, such as social walking journeys, often taking place via foot                                                                                                                                   |
| Individual characteristics  | Disability                  | Disability status not further described by authors                                                                                                                                                                           |
| Individual characteristics  | Load carrying ability       | Referred as head loading or portering                                                                                                                                                                                        |
| Individual characteristics  | Mobile phone ownership      | When considered as a mean to organise travel or as a substitutive of physical travel. Otherwise, factor included under SES                                                                                                   |
| Travel mode characteristics | Safety/crime                | It comprises any of the following factors reported by participants: safety (e.g., road traffic accidents, injuries, or fatalities), crime (e.g., interpersonal violence, harassment, mugging), behaviour of driver, security |
| Travel mode characteristics | Cost                        | It comprises any of the following factors reported by participants: ticket cost, price stability, affordability,                                                                                                             |
| Travel mode characteristics | Comfort/convenience         | The degree of ease or convenience. It comprises cleanliness and availability of space/seating (whether a service had seating ready for use)                                                                                  |
| Travel mode characteristics | Customer service            | The interaction between the consumer/transport user and a representative of that mode of travel                                                                                                                              |

|                             |                                         |                                                                                                                                                                                                                                                                                                                                                                                                                                                                                                         |
|-----------------------------|-----------------------------------------|---------------------------------------------------------------------------------------------------------------------------------------------------------------------------------------------------------------------------------------------------------------------------------------------------------------------------------------------------------------------------------------------------------------------------------------------------------------------------------------------------------|
| Travel mode characteristics | Accessibility/Availability of a service | It comprises any of the following factors reported by participants: accessibility, availability of services, speed (e.g., traffic jam, delays, travel time), reliability, waiting time, flexibility (door-to-door service/stops), timeliness/punctuality, time efficiency (working/operating quickly and effectively with regards to time management), frequency of trip departures, distance to public transport stop, operating hours, connection with other modes, time consistency, route frequency |
| Travel mode characteristics | Vehicle maintenance                     | Service/repair of motor vehicles                                                                                                                                                                                                                                                                                                                                                                                                                                                                        |
| Travel mode characteristics | Service standards/quality               | The quality of a service                                                                                                                                                                                                                                                                                                                                                                                                                                                                                |
| Travel mode characteristics | Ability to carry loads                  | The ability to carry objects over distances                                                                                                                                                                                                                                                                                                                                                                                                                                                             |
| Travel mode characteristics | Services on board                       | Services provided on board                                                                                                                                                                                                                                                                                                                                                                                                                                                                              |
| Travel mode characteristics | Better vehicular performance            | Less pollution/emission of smoke of a vehicle                                                                                                                                                                                                                                                                                                                                                                                                                                                           |
| Travel mode characteristics | Capacity                                | The number of people a service can accommodate                                                                                                                                                                                                                                                                                                                                                                                                                                                          |
| Travel mode characteristics | Responsiveness                          | The readiness with which service to respond to complaints/suggestions of improvement                                                                                                                                                                                                                                                                                                                                                                                                                    |
| Travel mode characteristics | Technical constraints                   | The degree to which a service is affected by vehicle breakdowns                                                                                                                                                                                                                                                                                                                                                                                                                                         |
| Travel mode characteristics | Provision of bicycle sharing scheme     | A system in which bikes are shared among users                                                                                                                                                                                                                                                                                                                                                                                                                                                          |
| Built environment           | Domestic pets (dogs)                    | Presence of domestic 'guard' dogs in the neighbourhood as a concern of safety for many children and adults' mobilities                                                                                                                                                                                                                                                                                                                                                                                  |
| Built environment           | Spatial layout                          | It comprises any of the following factors reported by participants: population density, urban sprawl, land use mix, street connectivity, city layout and city design                                                                                                                                                                                                                                                                                                                                    |
| Built environment           | Transport infrastructure                | It comprises any of the following factors reported by participants: transport infrastructure, sidewalk quality, street-crossing quality, cycle path quality, bicycle lanes, road quality, speed management infrastructure (measures to increase compliance with speed limits such as speed humps and raised platforms), street lighting (presence of street-lights on the edge of a road or path).                                                                                                      |
| Built environment           | Traffic levels                          | General levels of traffic including traffic volumes                                                                                                                                                                                                                                                                                                                                                                                                                                                     |
| Built environment           | Pollution or air quality                | Level of air pollution in the area                                                                                                                                                                                                                                                                                                                                                                                                                                                                      |

|                            |                                                      |                                                                                                                                                                                                                                                                                                                                                                                                                      |
|----------------------------|------------------------------------------------------|----------------------------------------------------------------------------------------------------------------------------------------------------------------------------------------------------------------------------------------------------------------------------------------------------------------------------------------------------------------------------------------------------------------------|
| Built environment          | Aesthetics                                           | Pleasantness of the area perceived by participants, green space                                                                                                                                                                                                                                                                                                                                                      |
| Built environment          | Incivilities                                         | Behaviour perceived as anti-social by participants such as waste blocking road and behaviours by street youths                                                                                                                                                                                                                                                                                                       |
| Built environment          | Waste management                                     | Management of solid waste in the area causing blockage on the road and pollution                                                                                                                                                                                                                                                                                                                                     |
| Built environment          | Cycling-friendliness                                 | It comprises any of the following factors reported by participants: availability of alternative roads (alternative roads available to cyclists), difficult road junctions (road junctions perceived to be difficult to navigate by cyclists), on-street parking (on-street parking causing obstruction to cyclists), blockages on neighbourhood routes (blockages in neighbourhoods causing obstruction to cyclists) |
| Built environment          | Destination accessibility                            | Car accessibility at the destination e.g., parking space                                                                                                                                                                                                                                                                                                                                                             |
| Built environment          | Poor driving by other drivers                        | Inconsiderate driving behaviour such as stopping in the middle of the road and cutting in front of others                                                                                                                                                                                                                                                                                                            |
| Built environment          | Flooded roadway                                      | Road subjected to flooding                                                                                                                                                                                                                                                                                                                                                                                           |
| Built environment          | Road blockages                                       | Any obstruction on the road such as police checkpoints, road construction, oil tankers and vehicle breakdowns                                                                                                                                                                                                                                                                                                        |
| Built environment          | Area boys/touts/hawkers                              | People attempting to sell things on the side of the road                                                                                                                                                                                                                                                                                                                                                             |
| Socio-cultural environment | Social expectations (broadly defined)                | It comprises any of the following factors reported by participants: social norms, gender roles, religious norms, cultural norms, social inclusion, generational relations, mode seen as cool, mode recommended by friends, attitudes of parents/teachers/peers towards mode, parental rules                                                                                                                          |
| Socio-cultural environment | Stigmatisation/aspiration of particular travel modes | It refers to the population's image or perception of the mode (e.g., condemning/lauding certain travel modes)                                                                                                                                                                                                                                                                                                        |
| Socio-cultural environment | Incivilities                                         | Societal anxieties in relation to crime and danger                                                                                                                                                                                                                                                                                                                                                                   |
| Socio-cultural environment | Crime                                                | Level of crime in the area                                                                                                                                                                                                                                                                                                                                                                                           |
| Socio-cultural environment | Water gathering                                      | Cultural and social underpinnings of inadequate access to water                                                                                                                                                                                                                                                                                                                                                      |
| Socio-cultural environment | Physical vulnerability riding bicycles               | The perceived physical vulnerability of girls, particularly in relation to reproductive health, when riding bicycles                                                                                                                                                                                                                                                                                                 |
| Natural environment        | Weather                                              | It comprises any of the following factors reported by participants: climate (e.g., rainy vs. dry season), weather (e.g., hot temperatures), wind                                                                                                                                                                                                                                                                     |

|                                 |                             |                                                                                                                                                                             |
|---------------------------------|-----------------------------|-----------------------------------------------------------------------------------------------------------------------------------------------------------------------------|
| Natural environment             | Pollution                   | Introduction of harmful materials into the environment                                                                                                                      |
| Natural environment             | Time of day of travel       | Daylight travel versus darkness or night-time travel                                                                                                                        |
| Natural environment             | Topography (flat landscape) | It comprises any of the following factors reported by participants: topography (flat landscape), hilliness, terrain, altitudes                                              |
| Natural environment             | Wildlife                    | Wild animals near roads                                                                                                                                                     |
| Policy or political environment | Transport sector            | It comprises any of the following factors reported by participants: transport regulations, taxes, regional or national travel budgets, regional or national travel policies |
| Policy or political environment | Urban planning sector       | Design and regulation of urban environment including renewal                                                                                                                |
| Policy or political environment | Policy environment          | Wider policy environment including corruption, mismanagement, coordination, and multi-sectoral engagement                                                                   |
| Policy or political environment | Historical legacies         | Legacies of historical events such as apartheid, colonisation, war, and globalisation. It includes class or racial-residential segregation as legacy of apartheid           |
| Policy or political environment | Digital technologies        | Virtual mobility using digital technologies to share videos and images of different places                                                                                  |
| Policy or political environment | Law enforcement             | Policing on the streets including removal and dispersal of homeless people and street youths                                                                                |
| Policy or political environment | Economic climate            | Factors affecting economy in a city such as investments from private companies and city or federal governments                                                              |
| Policy or political environment | International investment    | Investment into transport infrastructure by international institutions                                                                                                      |

**File S11. All exposures and by study design identified in Analysis 1.**

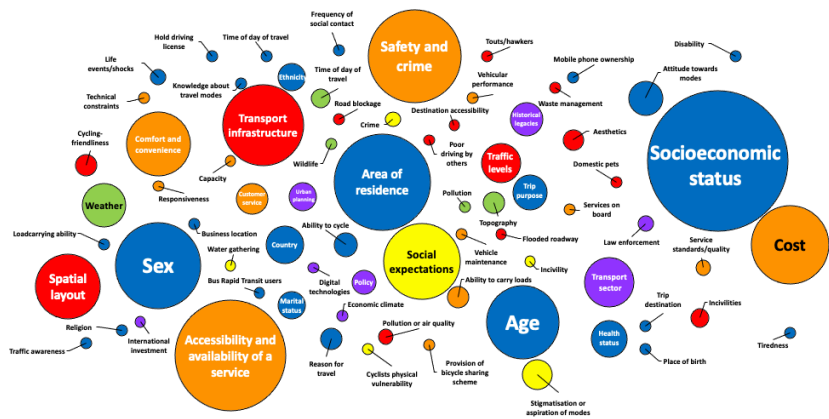

All studies

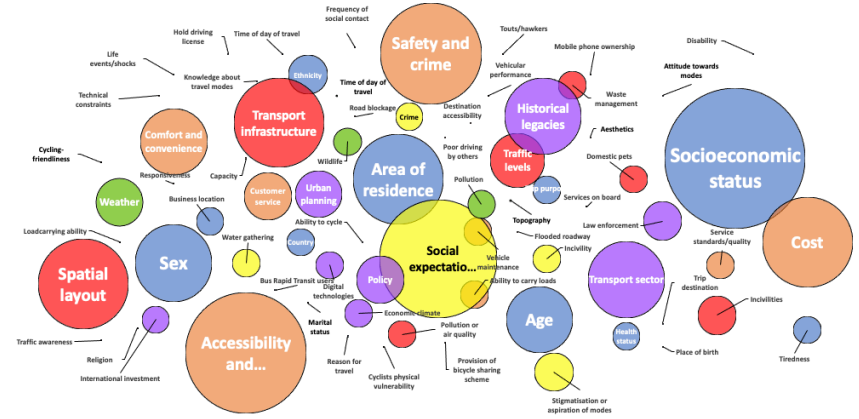

## Qualitative studies

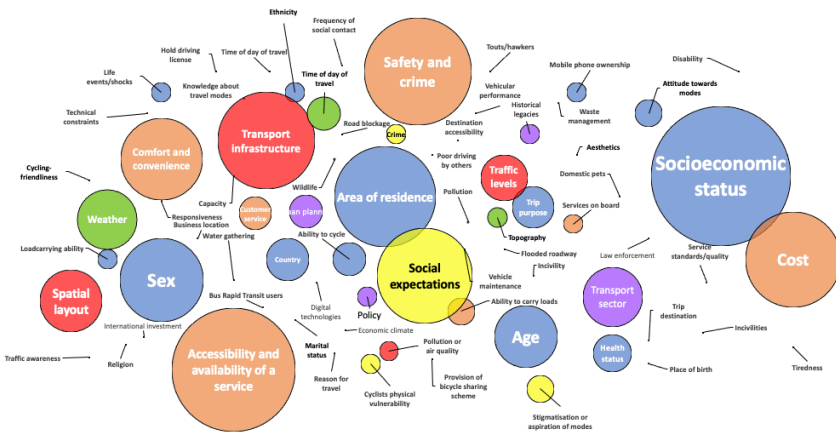

## Mixed methods studies

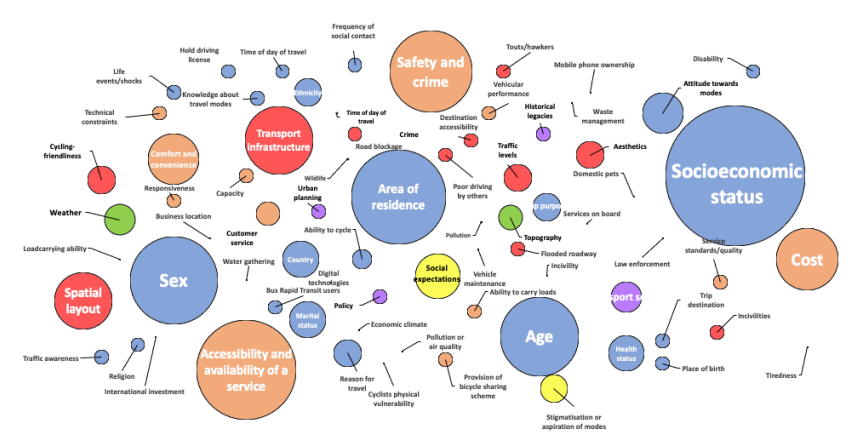

## Quantitative studies

**Figure S11.** Frequency of all exposures identified in the literature, grouped by thematic set (represented by different colours) and by study design. The size of the bubbles represents the percentage of exposure over total. Figure created using Microsoft Excel.



|                                        | Exposure                                    | All studies     |            | Qualitative studies |            | Mixed methods studies |            | Quantitative studies |            |
|----------------------------------------|---------------------------------------------|-----------------|------------|---------------------|------------|-----------------------|------------|----------------------|------------|
|                                        |                                             | % over category | % over all | % over category     | % over all | % over category       | % over all | % over category      | % over all |
| <b>Individual characteristics</b>      | Socioeconomic status                        | 39.2            | 17.5       | 14.1                | 2.5        | 29.3                  | 5.1        | 56.5                 | 9.9        |
|                                        | Area of residence                           | 18.3            | 8.2        | 12.4                | 1.0        | 32.6                  | 2.7        | 55.1                 | 4.5        |
|                                        | Sex                                         | 14.4            | 6.4        | 11.4                | 0.7        | 28.6                  | 1.8        | 60.0                 | 3.8        |
|                                        | Age                                         | 10.5            | 4.7        | 11.8                | 0.5        | 21.6                  | 1.0        | 66.7                 | 3.1        |
|                                        | Country                                     | 2.7             | 1.2        | 7.7                 | 0.1        | 38.5                  | 0.5        | 53.8                 | 0.6        |
|                                        | Health status                               | 2.5             | 1.1        | 8.3                 | 0.1        | 33.3                  | 0.4        | 58.3                 | 0.6        |
|                                        | Attitude towards modes                      | 2.3             | 1.0        | 0.0                 | 0.0        | 18.2                  | 0.2        | 81.8                 | 0.8        |
|                                        | Trip purpose                                | 2.3             | 1.0        | 9.1                 | 0.1        | 45.5                  | 0.5        | 36.4                 | 0.4        |
|                                        | Ethnicity                                   | 1.4             | 0.6        | 28.6                | 0.2        | 14.3                  | 0.1        | 57.1                 | 0.4        |
|                                        | Marital status                              | 1.4             | 0.6        | 0.0                 | 0.0        | 0.0                   | 0.0        | 100.0                | 0.6        |
|                                        | Ability to cycle                            | 1.0             | 0.5        | 0.0                 | 0.0        | 60.0                  | 0.3        | 40.0                 | 0.2        |
|                                        | Reason for travel                           | 0.8             | 0.4        | 0.0                 | 0.0        | 0.0                   | 0.0        | 100.0                | 0.4        |
|                                        | Life events/shocks                          | 0.4             | 0.2        | 0.0                 | 0.0        | 50.0                  | 0.1        | 50.0                 | 0.1        |
|                                        | Hold driving license                        | 0.2             | 0.1        | 0.0                 | 0.0        | 0.0                   | 0.0        | 100.0                | 0.1        |
|                                        | Knowledge about travel modes                | 0.2             | 0.1        | 0.0                 | 0.0        | 0.0                   | 0.0        | 100.0                | 0.1        |
|                                        | Business location                           | 0.2             | 0.1        | 100.0               | 0.1        | 0.0                   | 0.0        | 0.0                  | 0.0        |
|                                        | Tiredness                                   | 0.2             | 0.1        | 100.0               | 0.1        | 0.0                   | 0.0        | 0.0                  | 0.0        |
|                                        | Trip destination                            | 0.2             | 0.1        | 0.0                 | 0.0        | 0.0                   | 0.0        | 100.0                | 0.1        |
|                                        | Bus Rapid Transit users                     | 0.2             | 0.1        | 0.0                 | 0.0        | 0.0                   | 0.0        | 100.0                | 0.1        |
|                                        | Time of day of travel                       | 0.2             | 0.1        | 0.0                 | 0.0        | 0.0                   | 0.0        | 100.0                | 0.1        |
|                                        | Traffic awareness                           | 0.2             | 0.1        | 0.0                 | 0.0        | 0.0                   | 0.0        | 100.0                | 0.1        |
|                                        | Place of birth                              | 0.2             | 0.1        | 0.0                 | 0.0        | 0.0                   | 0.0        | 100.0                | 0.1        |
|                                        | Religion                                    | 0.2             | 0.1        | 0.0                 | 0.0        | 0.0                   | 0.0        | 100.0                | 0.1        |
|                                        | Frequency of social contact                 | 0.2             | 0.1        | 0.0                 | 0.0        | 0.0                   | 0.0        | 100.0                | 0.1        |
|                                        | Disability                                  | 0.2             | 0.1        | 0.0                 | 0.0        | 0.0                   | 0.0        | 100.0                | 0.1        |
|                                        | Loadcarrying ability                        | 0.2             | 0.1        | 0.0                 | 0.0        | 100.0                 | 0.1        | 0.0                  | 0.0        |
|                                        | Mobile phone ownership                      | 0.2             | 0.1        | 0.0                 | 0.0        | 100.0                 | 0.1        | 0.0                  | 0.0        |
| <b>Travel mode characteristics</b>     | Accessibility and availability of a service | 36.8            | 10.8       | 16.9                | 1.8        | 37.3                  | 4.0        | 45.8                 | 4.9        |
|                                        | Safety and crime                            | 26.2            | 7.7        | 16.7                | 1.3        | 39.3                  | 3.0        | 44.0                 | 3.4        |
|                                        | Cost                                        | 18.1            | 5.3        | 19.0                | 1.0        | 44.8                  | 2.4        | 36.2                 | 1.9        |
|                                        | Comfort and convenience                     | 12.1            | 3.6        | 15.4                | 0.5        | 48.7                  | 1.7        | 35.9                 | 1.3        |
|                                        | Customer service                            | 2.8             | 0.8        | 33.3                | 0.3        | 33.3                  | 0.3        | 33.3                 | 0.3        |
|                                        | Ability to carry loads                      | 1.2             | 0.4        | 25.0                | 0.1        | 50.0                  | 0.2        | 25.0                 | 0.1        |
|                                        | Service standards/quality                   | 0.6             | 0.2        | 50.0                | 0.1        | 0.0                   | 0.0        | 50.0                 | 0.1        |
|                                        | Vehicle maintenance                         | 0.3             | 0.1        | 100.0               | 0.1        | 0.0                   | 0.0        | 0.0                  | 0.0        |
|                                        | Services on board                           | 0.3             | 0.1        | 0.0                 | 0.0        | 100.0                 | 0.1        | 0.0                  | 0.0        |
|                                        | Vehicular performance                       | 0.3             | 0.1        | 0.0                 | 0.0        | 0.0                   | 0.0        | 100.0                | 0.1        |
|                                        | Capacity                                    | 0.3             | 0.1        | 0.0                 | 0.0        | 0.0                   | 0.0        | 100.0                | 0.1        |
|                                        | Responsiveness                              | 0.3             | 0.1        | 0.0                 | 0.0        | 0.0                   | 0.0        | 100.0                | 0.1        |
|                                        | Technical constraints                       | 0.3             | 0.1        | 0.0                 | 0.0        | 0.0                   | 0.0        | 100.0                | 0.1        |
|                                        | Provision of bicycle sharing scheme         | 0.3             | 0.1        | 0.0                 | 0.0        | 0.0                   | 0.0        | 100.0                | 0.1        |
| <b>Built Environment</b>               | Transport infrastructure                    | 46.0            | 5.8        | 17.5                | 1.0        | 42.9                  | 2.5        | 39.7                 | 2.3        |
|                                        | Spatial layout                              | 29.2            | 3.7        | 27.5                | 1.0        | 27.5                  | 1.0        | 45.0                 | 1.6        |
|                                        | Traffic levels                              | 10.2            | 1.3        | 28.6                | 0.4        | 42.9                  | 0.5        | 28.6                 | 0.4        |
|                                        | Aesthetics                                  | 2.9             | 0.4        | 0.0                 | 0.0        | 0.0                   | 0.0        | 100.0                | 0.4        |
|                                        | Cycling-friendliness                        | 2.9             | 0.4        | 0.0                 | 0.0        | 0.0                   | 0.0        | 100.0                | 0.4        |
|                                        | Incivilities                                | 2.2             | 0.3        | 66.7                | 0.2        | 0.0                   | 0.0        | 33.3                 | 0.1        |
|                                        | Pollution or air quality                    | 1.5             | 0.2        | 50.0                | 0.1        | 50.0                  | 0.1        | 0.0                  | 0.0        |
|                                        | Waste management                            | 0.7             | 0.1        | 100.0               | 0.1        | 0.0                   | 0.0        | 0.0                  | 0.0        |
|                                        | Destination accessibility                   | 0.7             | 0.1        | 0.0                 | 0.0        | 0.0                   | 0.0        | 100.0                | 0.1        |
|                                        | Poor driving by others                      | 0.7             | 0.1        | 0.0                 | 0.0        | 0.0                   | 0.0        | 100.0                | 0.1        |
|                                        | Flooded roadway                             | 0.7             | 0.1        | 0.0                 | 0.0        | 0.0                   | 0.0        | 100.0                | 0.1        |
|                                        | Road blockage                               | 0.7             | 0.1        | 0.0                 | 0.0        | 0.0                   | 0.0        | 100.0                | 0.1        |
|                                        | Area boys/Touts/Hawkers                     | 0.7             | 0.1        | 0.0                 | 0.0        | 0.0                   | 0.0        | 100.0                | 0.1        |
|                                        | Domestic pets (dogs)                        | 0.7             | 0.1        | 100.0               | 0.1        | 0.0                   | 0.0        | 0.0                  | 0.0        |
| <b>Socio-cultural environment</b>      | Social expectations                         | 81.2            | 5.1        | 33.9                | 1.7        | 46.4                  | 2.4        | 19.6                 | 1.0        |
|                                        | Stigmatisation or aspiration of modes       | 11.6            | 0.7        | 25.0                | 0.2        | 25.0                  | 0.2        | 50.0                 | 0.4        |
|                                        | Crime                                       | 2.9             | 0.2        | 50.0                | 0.1        | 50.0                  | 0.1        | 0.0                  | 0.0        |
|                                        | Incivility                                  | 1.4             | 0.1        | 100.0               | 0.1        | 0.0                   | 0.0        | 0.0                  | 0.0        |
|                                        | Water gathering                             | 1.4             | 0.1        | 100.0               | 0.1        | 0.0                   | 0.0        | 0.0                  | 0.0        |
|                                        | Physical vulnerability riding bicycles      | 1.4             | 0.1        | 0.0                 | 0.0        | 100.0                 | 0.1        | 0.0                  | 0.0        |
| <b>Natural environment</b>             | Weather                                     | 66.7            | 1.6        | 16.7                | 0.3        | 55.6                  | 0.9        | 27.8                 | 0.5        |
|                                        | Topography                                  | 14.8            | 0.4        | 0.0                 | 0.0        | 25.0                  | 0.1        | 75.0                 | 0.3        |
|                                        | Time of day of travel                       | 11.1            | 0.3        | 0.0                 | 0.0        | 100.0                 | 0.3        | 0.0                  | 0.0        |
|                                        | Wildlife                                    | 3.7             | 0.1        | 100.0               | 0.1        | 0.0                   | 0.0        | 0.0                  | 0.0        |
|                                        | Pollution                                   | 3.7             | 0.1        | 100.0               | 0.1        | 0.0                   | 0.0        | 0.0                  | 0.0        |
| <b>Policy or political environment</b> | Transport sector                            | 46.0            | 2.1        | 34.8                | 0.7        | 43.5                  | 0.9        | 21.7                 | 0.5        |
|                                        | Historical legacies                         | 20.0            | 0.9        | 80.0                | 0.7        | 10.0                  | 0.1        | 10.0                 | 0.1        |
|                                        | Urban planning                              | 14.0            | 0.6        | 42.9                | 0.3        | 42.9                  | 0.3        | 14.3                 | 0.1        |
|                                        | Policy                                      | 10.0            | 0.5        | 60.0                | 0.3        | 20.0                  | 0.1        | 20.0                 | 0.1        |
|                                        | Law enforcement                             | 4.0             | 0.2        | 100.0               | 0.2        | 0.0                   | 0.0        | 0.0                  | 0.0        |
|                                        | Digital technologies                        | 2.0             | 0.1        | 100.0               | 0.1        | 0.0                   | 0.0        | 0.0                  | 0.0        |
|                                        | Economic climate                            | 2.0             | 0.1        | 100.0               | 0.1        | 0.0                   | 0.0        | 0.0                  | 0.0        |
|                                        | International investment                    | 2.0             | 0.1        | 100.0               | 0.1        | 0.0                   | 0.0        | 0.0                  | 0.0        |

**File S12. Meta-method.**

| Qualitative studies (N=20)              |                          |                                             | Mixed-methods studies (N=27)                  |                          |                                             | Quantitative studies (N=71)     |                          |                                             |
|-----------------------------------------|--------------------------|---------------------------------------------|-----------------------------------------------|--------------------------|---------------------------------------------|---------------------------------|--------------------------|---------------------------------------------|
| Method                                  | Number of times reported | Frequency of method within study design (%) | Method                                        | Number of times reported | Frequency of method within study design (%) | Method                          | Number of times reported | Frequency of method within study design (%) |
| Focus groups                            | 12                       | 20                                          | Survey <sup>3</sup>                           | 24                       | 27                                          | Survey <sup>3</sup>             | 68                       | 91                                          |
| Participants interviews <sup>1</sup>    | 8                        | 13                                          | Participants interviews <sup>1</sup>          | 15                       | 16                                          | Secondary data                  | 3                        | 4                                           |
| Key informants' interviews <sup>2</sup> | 7                        | 12                                          | Key informants' interviews <sup>2</sup>       | 12                       | 14                                          | Accelerometry                   | 2                        | 3                                           |
| Survey <sup>3</sup>                     | 4                        | 7                                           | Focus groups                                  | 9                        | 10                                          | Field observations <sup>4</sup> | 1                        | 1                                           |
| Field observations <sup>4</sup>         | 4                        | 7                                           | Field observations <sup>4</sup>               | 8                        | 9                                           | Spatial analysis (mapping)      | 1                        | 1                                           |
| Photo-elicitation                       | 3                        | 5                                           | Geographic Information                        | 4                        | 5                                           | <b>Total:</b>                   | <b>75</b>                | <b>100</b>                                  |
| Life-story interviews                   | 3                        | 5                                           | Life-story interviews                         | 3                        | 3                                           |                                 |                          |                                             |
| Neighbourhood walkabouts                | 2                        | 3                                           | Stopwatch and traffic congestion registration | 3                        | 3                                           |                                 |                          |                                             |
| Individual conversations                | 2                        | 3                                           | Photo-elicitation                             | 2                        | 2                                           |                                 |                          |                                             |
| Written diaries                         | 2                        | 3                                           | Transect walks                                | 2                        | 2                                           |                                 |                          |                                             |
| Brainstorming diagrams                  | 1                        | 2                                           | Policy analysis                               | 1                        | 1                                           |                                 |                          |                                             |
| Drawing and painting exercises          | 1                        | 2                                           | Written diaries                               | 1                        | 1                                           |                                 |                          |                                             |
| Collage                                 | 1                        | 2                                           | Participatory mapping                         | 1                        | 1                                           |                                 |                          |                                             |
| Spatial analysis (mapping)              | 1                        | 2                                           | Spatial analysis (mapping)                    | 1                        | 1                                           |                                 |                          |                                             |
| Drama and role-play                     | 1                        | 2                                           | Land use maps and plans                       | 1                        | 1                                           |                                 |                          |                                             |
| Phone analyses                          | 1                        | 2                                           | Reconnaissance surveys                        | 1                        | 1                                           |                                 |                          |                                             |
| Debate                                  | 1                        | 2                                           | Road accident analysis                        | 1                        | 1                                           |                                 |                          |                                             |
| Policy analysis                         | 1                        | 2                                           | <b>Total:</b>                                 | <b>89</b>                | <b>100</b>                                  |                                 |                          |                                             |
| Community visioning workshops           | 1                        | 2                                           |                                               |                          |                                             |                                 |                          |                                             |
| 'Hanging out' and 'moving along'        | 1                        | 2                                           |                                               |                          |                                             |                                 |                          |                                             |
| Life-line interviews                    | 1                        | 2                                           |                                               |                          |                                             |                                 |                          |                                             |
| Transect walks                          | 1                        | 2                                           |                                               |                          |                                             |                                 |                          |                                             |
| Action research                         | 1                        | 2                                           |                                               |                          |                                             |                                 |                          |                                             |
| <b>Total:</b>                           | <b>60</b>                | <b>100</b>                                  |                                               |                          |                                             |                                 |                          |                                             |

<sup>1</sup> Participants interviews: un-structured or semi-structured; <sup>2</sup> Key informants' interviews: in-depth interviews or stakeholders or topic experts; <sup>3</sup> Survey: structured questionnaire either self-completed or administered by face-to face or by phone interview; <sup>4</sup> Field observations: field notes or participants' observations; <sup>5</sup> Secondary data analysis: census statistics or other available datasets

File S13. Meta-theory.

| All studies           |                            |                                    |                              |
|-----------------------|----------------------------|------------------------------------|------------------------------|
| Study design          | Number of included studies | Number of studies reporting theory | Studies reporting theory (%) |
| Qualitative studies   | 20                         | 10                                 | 50.0                         |
| Mixed-methods studies | 27                         | 8                                  | 29.6                         |
| Quantitative studies  | 71                         | 10                                 | 14.1                         |
| Total                 | 118                        | 28                                 | 23.7                         |

| Qualitative studies             |                                    |                                                  |
|---------------------------------|------------------------------------|--------------------------------------------------|
| Theory                          | Number of studies reporting theory | Studies reporting theory within study design (%) |
| Mobilities paradigm             | 6                                  | 60                                               |
| Social exclusion                | 1                                  | 10                                               |
| Gendered discourse              | 1                                  | 10                                               |
| Theory of planned behaviour     | 1                                  | 10                                               |
| Kaufmann's typology of mobility | 1                                  | 10                                               |

| Mixed-methods studies                                                               |                                    |                                                  |
|-------------------------------------------------------------------------------------|------------------------------------|--------------------------------------------------|
| Theory ( <i>discipline</i> )                                                        | Number of studies reporting theory | Studies reporting theory within study design (%) |
| Hägerstrand's space-time framework ( <i>human geography</i> )                       | 2                                  | 25                                               |
| Behavioural change transactional model                                              | 1                                  | 12.5                                             |
| Political economy perspective                                                       | 1                                  | 12.5                                             |
| Maslow's hierarchical pyramid of human needs ( <i>sociology</i> )                   | 1                                  | 12.5                                             |
| Kaufmann's 'motility' concept ( <i>human geography</i> )                            | 1                                  | 12.5                                             |
| Person-centred framework linking transport and wellbeing ( <i>human geography</i> ) | 1                                  | 12.5                                             |
| Social and economic exclusion ( <i>sociology</i> )                                  | 1                                  | 12.5                                             |

| Quantitative studies   |                                    |                                                  |
|------------------------|------------------------------------|--------------------------------------------------|
| Theory                 | Number of studies reporting theory | Studies reporting theory within study design (%) |
| Mobilities paradigm    | 9                                  | 90                                               |
| Stages of change model | 1                                  | 10                                               |
