# Supplementary material for: The Potential for Healthy, Sustainable, and Equitable Transport Systems in Africa and the Caribbean: A Mixed-Methods Systematic Review and Meta-Study
Source: MDPI journal article supplement (doi:10.3390/su15065303), 2023-03-16
Supplement: s1 [file s1]

Archive with 1 entries (1 files):
- sustainability-2256344-supplementary.pdf
